# Supplementary material for: Patterns of bleaching and mortality following widespread warming events in 2014 and 2015 at the Hanauma Bay Nature Preserve, Hawai‘i
Source: PeerJ. 2017 May 30;5:e3355. doi: 10.7717/peerj.3355 (PMC5452947; doi:10.7717/peerj.3355)
Supplement: Data S1 [file peerj-05-3355-s001.xlsx]

## Sheet: HBay 160112
Hanauma Bay	Observer Ku'ulei		Conditions surge, swell, patially cloudy					15m transects		BD=Backdoors		Pl=porites lobata				GPS	Pictures
Site	Species	Size	Live (%)	Bleach (%)	Pale (%)	Recently Dead (%)	other (abraded)	total	Notes	KH=Keyhole		Pc=Porites compressa
1a BD	Pl	5	100					100	GPS waypoint 556	CH=Channel		Pm=Pocillopora meandrina
1a BD	Pl	10	100					100		WB=Witches Brew		Pv=Pavona varians
1a BD	Pl	95	100					100				Co=Cyphastrea ocellina
1a BD	Pl	110	100					100				Mc=Montipora capitata
1a BD	Pl	10	100					100	21.2726	-157.695		Mp=Montipora patula
1a BD	Pl	15	100					100				Pt=Palythoa tuberculosa
1a BD	Pl	10	100					100				Pr=Porites rus
1a BD	Pl	55	100					100
1a BD	Pl	10	100					100
1a BD	Pl	10	100					100
1a BD	Pl	10	100					100
1a BD	Pl	60	100					100
1a BD	Pl	40	80		20			100
1a BD	Pt	75	100					100
1a BD	Pt	200	90	10				100
1a BD	Pt	450	95	5				100
1a BD	Pm	50	100					100
1a BD	Pv	15	100					100
1a BD	Pv	10	100					100
1a BD	Pl	15	100					100
1a BD	Pv	5	100					100
Site	Species	Size	Live (%)	Bleach (%)	Pale (%)	Recently Dead (%)	other (abraded)	total	GPS waypoint 555
1b BD	Mp	45	100					100
1b BD	Mc	25	60				40	100	Notes
1b BD	Pm	10	100					100
1b BD	Co	3	20				80	100	21.2724	-157.695
1b BD	Co	7	80				20	100
1b BD	Pr	40	100					100
1b BD	Pr	25	100					100
1b BD	Pl	20	100					100
1b BD	Pl	15	100
Site	Species	Size	Live (%)	Bleach (%)	Pale (%)	Recently Dead (%)	other (abraded)	total	GPS waypoint 554
2a KH	Mp	130	70				30	100
2a KH	Mc	20	50				50	100	Notes
2a KH	Pm	25	100					100
2a KH	Mc	100	50				50	100	21.2723	-157.695
2a KH	Pm	30	95			5		100
2a KH	Pr	10	90				10	100
2a KH	Pl	15	90				10	100
2a KH	Mc	25	100					100
2a KH	Pm	20	100					100
Site	Species	Size	Live (%)	Bleach (%)	Pale (%)	Recently Dead (%)	other (abraded)	total	GPS waypoint 553
2b KH	Co	12	90				10	100
2b KH	Pm	7	100					100	Notes
2b KH	Pm	10	100					100
2b KH	Pm	25	100					100	21.2719	-157.696
2b KH	Mc	40	100					100
2b KH	Mc	10	100					100
2b KH	Pc	25	60				40	100
2b KH	Pc	45	50				5	55
2b KH	Co	10	50				50	100
2b KH	Pm	25	100					100
2b KH	Pm	20	95				5	100
Site	Species	Size	Live (%)	Bleach (%)	Pale (%)	Recently Dead (%)	other (abraded)	total	GPS waypoint 552
3a CH	Pc	20	50				50	100
3a CH	Pl	65	30				70	100
3a CH	Pl	25	20				80	100
3a CH	Pl	40	10				90	100	Notes
3a CH	Co	3	50				50	100
3a CH	Co	4	10				90	100
3a CH	Co	10	30				70	100
3a CH	Co	10	10				90	100
3a CH	Pl	60	20				80	100	21.2703	-157.697
3a CH	Pl	5	100					100
3a CH	Pc	15	50				50	100
3a CH	Pc	10	60				40	100
3a CH	Pc	30	100					100
3a CH	Pl	5	100					100
3a CH	Pl	25	10			20	70	100
3a CH	Pm	40	100					100
3a CH	Mc	100	90				10	100
3a CH	Mc	40	90				10	100
3a CH	Mc	15	80				20	100
3a CH	Mc	15	90				10	100
3a CH	Pm	60	100					100
Site	Species	Size	Live (%)	Bleach (%)	Pale (%)	Recently Dead (%)	other (abraded)	total
3b CH	Pm	25	100					100
3b CH	Pl	30	80				20	100
3b CH	Pl	15	95				5	100
3b CH	Pl	10	90				10	100	Notes
3b CH	Pl	20	100					100
3b CH	Pl	40	100					100	21.2701	-157.697
3b CH	Mc	90	90		10			100
3b CH	Co	5	100					100
3b CH	Co	10	80				20	100
3b CH	Mc	50	100					100
3b CH	Mc	105	100					100
3b CH	Pc	20	80				20	100
3b CH	Pl	15	100					100
3b CH	Pl	60	100					100
3b CH	Pl	45	100					100
3b CH	Pl	40	100					100
3b CH	Co	5	100					100
3b CH	Mc	95	100					100
3b CH	Mc	80	100					100
3b CH	Mc	75	100					100
3b CH	Mc	110	100					100
3b CH	Co	10	100					100
3b CH	Co	5	90				10	100
Site	Species	Size	Live (%)	Bleach (%)	Pale (%)	Recently Dead (%)	other (abraded)	total	GPS waypoint 550
4a WB	Co	5	100					100
4a WB	Mc	120	90				10	100
4a WB	Mc	15	80				20	100
4a WB	Mc	60	80				20	100	Notes
4a WB	Mp	30	100					100	21.2688	-157.697
4a WB	Mp	60	100					100
4a WB	Mc	5	100					100
4a WB	Mc	100	100					100
4a WB	Mc	15	100					100
4a WB	Pl	40	100					100
4a WB	Pl	35	100					100
4a WB	Pl	55	100					100
4a WB	Pl	5	100					100
4a WB	Mc	40	40		60			100
4a WB	Pl	40	100					100
4a WB	Pl	50	100					100
4a WB	Co	5	100					100
4a WB	Pl	150	100					100
4a WB	Pl	10	100					100
4a WB	Pl	20	100					100
4a WB	Pl	40	100					100
4a WB	Pl	50	100					100
4a WB	Pl	45	100					100
4a WB	Pl	35	20		80			100
Site	Species	Size	Live (%)	Bleach (%)	Pale (%)	Recently Dead (%)	other (abraded)	total	GPS waypoint 549
4b WB	Pl	20	60				40	100
4b WB	Pl	20	60				40	100
4b WB	Co	4	100					100
4b WB	Pl	10	90				10	100	Notes
4b WB	Pl	10	90				10	100
4b WB	Pl	12	95				5	100	21.2685	-157.697
4b WB	Pl	17	95				5	100
4b WB	Pl	10	100					100
4b WB	Pl	5	100					100
4b WB	Pl	12	90				10	100
4b WB	Pl	20	80				20	100
4b WB	Pl	20	90				10	100
4b WB	Pl	10	100					100
4b WB	Pl	20	100					100
4b WB	Pl	15	80				20	100
4b WB	Pl	25	10	80		10		100
4b WB	Pl	30	20	70		10		100
4b WB	Pl	30	100					100
4b WB	Pl	25	15	65		20		100
4b WB	Pl	50	10	80		10		100
4b WB	Pl	20	100					100
4b WB	Pl	30		90		10		100
4b WB	Pl	15	90				10	100
4b WB	Pl	15	90				10	100
4b WB	Pl	15	100					100
4b WB	Pl	20	90				10	100
4b WB	Pl	25	100					100
4b WB	Pl	10	80				20	100
4b WB	Pl	5	90				10	100
4b WB	Pl	10	90				10	100
4b WB	Pl	55	100					100
4b WB	Pl	45	10	70			20	100
4b WB	Pl	10	100					100

## Sheet: HBay 151020
Hanauma Bay	Observer Ku'ulei		Conditions surge, swell, patially cloudy				15m transects		BD=Backdoors		Pl=porites lobata				GPS	Pictures
Site	Species	Size	Live (%)	Bleach (%)	Pale (%)	Recently Dead (%)	total	Notes	KH=Keyhole		Pc=Porites compressa
1a BD	Pl	50	10	70	0	20	100		CH=Channel		Pm=Pocillopora meandrina
1a BD	Pl	25	0	50	50	0	100		WB=Witches Brew		Pv=Pavona varians
1a BD	Pl	15	0	90	0	10	100				Co=Cyphastrea ocellina
1a BD	Pl	20	0	60	40	0	100				Mc=Montipora capitata
1a BD	Pl	10	0	20	80	0	100				Mp=Montipora patula
1a BD	Pl	60	20	30	50	0	100
1a BD	Pl	30	30	60	10	0	100
1a BD	Pl	20	90	0	10	0	100
1a BD	Pl	150	0	80	10	10	100
1a BD	Pl	25	20	50	30	0	100
1a BD	Pl	10	10	20	70	0	100
1a BD	Pl	20	0	80	20	0	100
1a BD	Pl	40	50	0	50	0	100
1a BD	Pl	35	50	0	50	0	100
1a BD	Pl	20	50	0	50	0	100
1a BD	Pl	35	70	10	20	0	100
1a BD	Pl	10	80	0	20	0	100
1a BD	Pl	10	80	0	20	0	100
1a BD	Pm	50	50	50	0	0	100
1a BD	Pl	10	0	100	0	0	100
1a BD	Pc	10	100	0	0	0	100
1a BD	Pm	25	30	70	0	0	100
1a BD	Pl	15	0	100	0	0	100
Site	Species	Size	Live (%)	Bleach (%)	Pale (%)	Recently Dead (%)	total	Notes
1b BD	Pm	15	80	20	0	0	100
1b BD	Pl	70	0	30	20	50	100
1b BD	Pl	10	0	100	0	0	100
1b BD	Pl	10	100	0	0	0	100
1b BD	Co	5	50	30	20	0	100
1b BD	Co	10	60	30	10	0	100
1b BD	Pl	10	30	40	30	0	100
1b BD	Pl	15	90	0	10	0	100
Site	Species	Size	Live (%)	Bleach (%)	Pale (%)	Recently Dead (%)	total	Notes
2a KH	Pm	15	0	100	0	0	100
2a KH	Mc	60	0	50	50	0	100
2a KH	Pm	10	0	80	20	0	100
2a KH	Pl	20	10	60	30	0	100
2a KH	Pm	5	0	90	10	0	100
2a KH	Pm	40	0	80	20	0	100
2a KH	Mc	120	70	0	30	0	100
2a KH	Mc	180	80	0	20	0	100
2a KH	Pm	15	0	90	0	10	100
2a KH	Pm	5	0	90	10	0	100
2a KH	Pv	5	80	0	0	0	80	20% abraded
Site	Species	Size	Live (%)	Bleach (%)	Pale (%)	Recently Dead (%)	total	Notes
2b KH	Mc	70	70	20	10	0	100
2b KH	Pm	5	0	90	0	10	100
2b KH	Pm	40	20	60	20	0	100	broken (Hobo marker)
2b KH	Pm	25	30	70	0	0	100
2b KH	Pm	30	10	60	30	0	100
2b KH	Pm	5	10	80	10	0	100
2b KH	Pm	5	10	80	10	0	100
2b KH	Co	5	80	10	10	0	100
2b KH	Mc	100	10	80	10	0	100
2b KH	Pm	0	0	100	0	0	100
2b KH	Co	0	40	40	20	0	100
2b KH	Pc	60	10	20	70	0	100
2b KH	Pc	30	20	10	70	0	100
Site	Species	Size	Live (%)	Bleach (%)	Pale (%)	Recently Dead (%)	total	Notes
3a CH	Pm	20	20	40	40	0	100
3a CH	Pc	5	0	20	80	0	100
3a CH	Pc	10	0	20	80	0	100
3a CH	Pm	30	40	40	20	0	100
3a CH	Mc	60	10	40	50	0	100
3a CH	Pm	30	90	0	10	0	100
3a CH	Pl	50	90	0	10	0	100
3a CH	Mc	150	20	50	30	0	100
3a CH	Pc	45	20	0	0	0	20	80% abraded
3a CH	Pv	40	90	0	10	0	100
3a CH	Pv	15	70	30	0	0	100
3a CH	Mc	70	50	30	20	0	100
3a CH	Mc	20	0	90	10	0	100
3a CH	Mc	15	10	80	10	0	100
3a CH	Pm	50	0	100	0	0	100
3a CH	Pc	30	90	0	10	0	100
Site	Species	Size	Live (%)	Bleach (%)	Pale (%)	Recently Dead (%)	total	Notes
3b CH	Mc	200	80	10	10	0	100
3b CH	Pm	30	60	20	20	0	100
3b CH	Mc	60	10	0	90	0	100	Mc purple
3b CH	Pm	10	10	10	80	0	100
3b CH	Mc	80	10	70	20	0	100
3b CH	Mc	10	90	10	0	0	100
3b CH	Mc	15	90	10	0	0	100
3b CH	Mc	30	90	10	0	0	100
3b CH	Mc	40	90	10	0	0	100
3b CH	Mc	200	20	50	30	0	100
3b CH	Mc	150	90	0	10	0	100
3b CH	Mc	65	50	30	20	0	100
3b CH	Pm	40	20	80	0	0	100
3b CH	Pm	55	40	40	10	10	100
3b CH	Mp	100	10	80	10	0	100
3b CH	Pl	20	80	0	20	0	100
3b CH	Co	15	70	20	10	0	100
Site	Species	Size	Live (%)	Bleach (%)	Pale (%)	Recently Dead (%)	total	Notes
4a WB	Pl	25	10	50	40	0	100	Pavona duerdeni not on transect but almost completely bleached in WB area
4a WB	Mc	250	70	20	10	0	100
4a WB	Mc	100	20	40	40	0	100
4a WB	Mc	60	50	40	10	0	100
4a WB	Mc	40	20	70	10	0	100
4a WB	Mc	10	0	100	0	0	100
4a WB	Mc	75	60	20	20	0	100
4a WB	Pv	10	0	100	0	0	100
4a WB	Pv	10	0	80	20	0	100
4a WB	Pv	10	0	100	0	0	100
4a WB	Pv	5	0	100	0	0	100
4a WB	Pv	80	10	80	10	0	100
4a WB	Pv	40	20	60	20	0	100
4a WB	Pv	5	0	80	20	0	100
4a WB	Pv	5	0	100	0	0	100
4a WB	Mc	30	70	10	20	0	100
4a WB	Pv	10	0	100	0	0	100
4a WB	Pv	35	0	100	0	0	100
4a WB	Mc	30	0	20	80	0	100
4a WB	Mc	60	50	10	40	0	100
4a WB	Mc	50	0	80	20	0	100
4a WB	Co	75	20	80	0	0	100
Site	Species	Size	Live (%)	Bleach (%)	Pale (%)	Recently Dead (%)	total	Notes
4b WB	Pl	60	0	0	0	100	100
4b WB	Pc	10	100	0	0	0	100
4b WB	Pc	5	20	50	30	0	100
4b WB	Pc	15	100	0	0	0	100
4b WB	Pl	35	50	0	50	0	100
4b WB	Pl	10	80	10	10	0	100
4b WB	Pl	40	0	100	0	0	100
4b WB	Pl	20	0	70	0	30	100
4b WB	Pl	10	100	0	0	0	100
4b WB	Pl	15	0	0	100	0	100
4b WB	Pl	20	80	0	20	0	100
4b WB	Pl	85	0	80	0	20	100
4b WB	Pl	20	0	90	0	10	100
4b WB	Pl	60	0	70	0	30	100
4b WB	Pl	30	0	100	0	0	100
4b WB	Pl	45	0	90	0	10	100
4b WB	Pl	40	0	90	0	10	100
4b WB	Pl	100	90	0	10	0	100
4b WB	Pl	10	100	0	0	0	100
4b WB	Pl	90	100	0	0	0	100
4b WB	Pl	15	0	80	20	0	100
4b WB	Pl	10	0	100	0	0	100
4b WB	Pl	5	0	90	10	0	100
4b WB	Pl	35	0	100	0	0	100
4b WB	Pl	25	0	100	0	0	100
4b WB	Pl	35	0	100	0	0	100
4b WB	Pl	80	100	0	0	0	100
4b WB	Pl	25	50	0	50	0	100
4b WB	Pl	30	0	100	0	0	100
4b WB	Pl	10	0	90	0	10	100
4b WB	Pl	10	100	0	0	0	100
4b WB	Pl	150	100	0	0	0	100
4b WB	Pl	15	40	0	60	0	100
4b WB	Pv	10	80	0	20	0	100

## Sheet: Transects
			Start		End
Transect	Start Mark	End Mark	Lat	Long	Lat	Long
1A	424	425	21.2559	157.471	21.1621	157.414
1B	426	428	21.1621	157.414	21.162	157.414
2A	430	431	21.1621	157.414	21.162	157.414
2B	432	433	21.162	157.414	21.1618	157.414
3A	434	437	21.1618	157.414	21.1613	157.415
3B	438	439	21.1614	157.415	21.1612	157.415
4A	441	442	21.1612	157.415	21.1608	157.415
4B	443	444	21.1606	157.415	21.1606	157.415

## Sheet: Temperature
Date	Hour	BackDoor	Channel	Keyhole 1	Keyhole 2	10M Cramp	3M Cramp		Mean by month by site (mid day 11-14)									Mean Midday Daily temp		BD	CH	K1	K2	Mean Nightly temp	BD	CH	K1	K2
2015-06-30 12:00:00	2015-06-30 12:00:00	26.769	27.481	27.014	27.038	25.695	26.353	Day			Mean Mid Day								2015-06-30	26.924	27.669	27.18	27.123	2015-06-30	27.279	27.87	27.512	27.525
2015-06-30 12:15:00	2015-06-30 12:15:00	26.793	27.53	27.014	27.038	25.72	26.329	Day	Month	BD	SE	CH	SE	KH1	SE	KH2	SE		2015-07-01	26.923	27.507	27.165	27.087	2015-07-01	26.726	27.011	26.859	26.886
2015-06-30 12:30:00	2015-06-30 12:30:00	26.842	27.579	27.063	27.038	25.72	26.28	Day	June	26.924	0.0385	27.669	0.0416	27.18	0.0472	27.123	0.031		2015-07-02	26.854	27.332	27.12	27.039	2015-07-02	26.511	26.786	26.613	26.619
2015-06-30 12:45:00	2015-06-30 12:45:00	26.867	27.628	27.112	27.063	25.574	26.256	Day	July	27.165	0.0191	27.571	0.0248	27.396	0.0214	27.366	0.0217		2015-07-03	27.002	27.519	27.274	27.25	2015-07-03	26.439	26.687	26.496	26.508
2015-06-30 13:00:00	2015-06-30 13:00:00	26.916	27.677	27.161	27.087	25.428	26.207	Day	August	28.269	0.0275	28.596	0.0297	28.513	0.0277	28.463	0.0274		2015-07-04	26.914	27.424	27.235	27.144	2015-07-04	26.393	26.637	26.469	26.469
2015-06-30 13:15:00	2015-06-30 13:15:00	26.965	27.727	27.235	27.136	25.331	26.158	Day	September	28.629	0.0186	28.785	0.0193	28.801	0.021	28.785	0.0202		2015-07-05	26.937	27.243	27.169	27.089	2015-07-05	26.554	26.682	26.578	26.589
2015-06-30 13:30:00	2015-06-30 13:30:00	27.014	27.751	27.284	27.186	25.307	26.158	Day	October	27.56	0.0202	27.563	0.0202	27.763	0.02	27.762	0.02		2015-07-06	26.451	26.923	26.718	26.665	2015-07-06	26.42	26.531	26.456	26.471
2015-06-30 13:45:00	2015-06-30 13:45:00	27.063	27.801	27.358	27.235	25.307	26.158	Day	November	26.647	0.0199	26.684	0.0233	26.766	0.0212	26.78	0.0213		2015-07-07	26.637	26.886	26.718	26.669	2015-07-07	26.474	26.523	26.488	26.499
2015-06-30 14:00:00	2015-06-30 14:00:00	27.087	27.85	27.382	27.284	25.355	26.158	Day	December	25.895	0.0167	25.908	0.02	26.011	0.0182	26.029	0.0186		2015-07-08	26.643	27.005	26.846	26.784	2015-07-08	26.667	26.725	26.684	26.689
2015-06-30 14:15:00	2015-06-30 14:15:00	27.136	27.899	27.431	27.333	25.477	26.182	Night	January	25.261	0.0178	25.254	0.022	25.359	0.0229	25.362	0.0232		2015-07-09	26.727	26.942	26.952	26.906	2015-07-09	26.795	26.795	26.788	26.804
2015-06-30 14:30:00	2015-06-30 14:30:00	27.186	27.974	27.481	27.407	25.598	26.207	Night											2015-07-10	26.846	27.048	27.167	27.127	2015-07-10	26.853	26.847	26.888	26.911
2015-06-30 14:45:00	2015-06-30 14:45:00	27.21	28.023	27.53	27.456	25.744	26.231	Night											2015-07-11	26.933	27.102	27.067	27.053	2015-07-11	26.874	26.968	26.911	26.928
2015-06-30 15:00:00	2015-06-30 15:00:00	27.235	28.072	27.579	27.505	25.866	26.28	Night											2015-07-12	27.382	27.791	27.748	27.708	2015-07-12	27.239	27.538	27.397	27.406
2015-06-30 15:15:00	2015-06-30 15:15:00	27.284	28.122	27.628	27.554	25.963	26.329	Night											2015-07-13	27.036	27.263	27.24	27.225	2015-07-13	27.106	27.202	27.2	27.224
2015-06-30 15:30:00	2015-06-30 15:30:00	27.308	28.171	27.677	27.604	26.036	26.378	Night											2015-07-14	26.842	27.127	27.014	26.974	2015-07-14	26.789	26.761	26.887	26.891
2015-06-30 15:45:00	2015-06-30 15:45:00	27.358	28.196	27.702	27.653	26.109	26.402	Night											2015-07-15	27.295	27.708	27.539	27.496	2015-07-15	27.07	27.126	27.234	27.218
2015-06-30 16:00:00	2015-06-30 16:00:00	27.382	28.245	27.727	27.677	26.109	26.426	Night											2015-07-16	27.367	27.676	27.736	27.706	2015-07-16	27.218	27.438	27.343	27.348
2015-06-30 16:15:00	2015-06-30 16:15:00	27.407	28.295	27.727	27.702	26.109	26.426	Night											2015-07-17	27.53	28.056	27.941	27.947	2015-07-17	27.365	27.697	27.541	27.543
2015-06-30 16:30:00	2015-06-30 16:30:00	27.431	28.32	27.751	27.727	26.134	26.426	Night											2015-07-18	27.56	28.191	27.782	27.795	2015-07-18	27.392	27.446	27.362	27.372
2015-06-30 16:45:00	2015-06-30 16:45:00	27.456	28.32	27.776	27.751	26.158	26.451	Night											2015-07-19	27.585	27.951	27.926	27.934	2015-07-19	27.248	27.309	27.306	27.312
2015-06-30 17:00:00	2015-06-30 17:00:00	27.456	28.32	27.776	27.751	26.207	26.5	Night											2015-07-20	27.437	28.004	27.715	27.693	2015-07-20	27.152	27.301	27.176	27.18
2015-06-30 17:15:00	2015-06-30 17:15:00	27.456	28.32	27.751	27.751	26.256	26.549	Night											2015-07-21	27.235	27.703	27.496	27.477	2015-07-21	27.064	27.312	27.138	27.147
2015-06-30 17:30:00	2015-06-30 17:30:00	27.431	28.27	27.727	27.751	26.304	26.598	Night											2015-07-22	27.188	27.849	27.356	27.318	2015-07-22	27.019	27.323	27.137	27.142
2015-06-30 17:45:00	2015-06-30 17:45:00	27.431	28.221	27.702	27.727	26.329	26.646	Night											2015-07-23	26.948	27.547	26.993	26.985	2015-07-23	26.81	26.978	26.85	26.85
2015-06-30 18:00:00	2015-06-30 18:00:00	27.407	28.147	27.653	27.702	26.353	26.671	Night											2015-07-24	27.016	27.229	27.163	27.131	2015-07-24	26.999	26.951	26.984	26.983
2015-06-30 18:15:00	2015-06-30 18:15:00	27.431	28.122	27.628	27.677	26.353	26.695	Night											2015-07-25	27.176	27.399	27.244	27.238	2015-07-25	27.156	27.096	27.127	27.126
2015-06-30 18:30:00	2015-06-30 18:30:00	27.431	28.072	27.604	27.653	26.378	26.72	Night											2015-07-26	27.463	27.839	27.543	27.539	2015-07-26	27.264	27.384	27.329	27.338
2015-06-30 18:45:00	2015-06-30 18:45:00	27.407	28.048	27.604	27.628	26.378	26.744	Night											2015-07-27	27.537	27.904	27.636	27.625	2015-07-27	27.495	27.609	27.569	27.573
2015-06-30 19:00:00	2015-06-30 19:00:00	27.382	28.023	27.604	27.628	26.402	26.744	Night											2015-07-28	27.748	28.175	27.972	27.968	2015-07-28	27.578	27.68	27.665	27.675
2015-06-30 19:15:00	2015-06-30 19:15:00	27.358	27.998	27.604	27.628	26.256	26.744	Night											2015-07-29	27.624	28.196	27.974	27.962	2015-07-29	27.479	27.644	27.68	27.687
2015-06-30 19:30:00	2015-06-30 19:30:00	27.333	27.949	27.579	27.604	25.939	26.744	Night											2015-07-30	27.636	28.181	27.943	27.93	2015-07-30	27.466	27.541	27.661	27.67
2015-06-30 19:45:00	2015-06-30 19:45:00	27.308	27.899	27.554	27.579	25.647	26.744	Night											2015-07-31	27.651	27.97	27.894	27.884	2015-07-31	27.376	27.453	27.641	27.646
2015-06-30 20:00:00	2015-06-30 20:00:00	27.308	27.85	27.53	27.554	25.428	26.72	Night											2015-08-01	27.237	27.647	27.439	27.433	2015-08-01	26.998	27.027	27.127	27.132
2015-06-30 20:15:00	2015-06-30 20:15:00	27.308	27.776	27.481	27.53	25.307	26.598	Night											2015-08-02	27.206	27.608	27.335	27.31	2015-08-02	26.902	26.86	27.029	27.036
2015-06-30 20:30:00	2015-06-30 20:30:00	27.333	27.727	27.456	27.505	25.258	26.5	Night											2015-08-03	27.539	27.826	27.788	27.752	2015-08-03	27.166	27.167	27.216	27.217
2015-06-30 20:45:00	2015-06-30 20:45:00	27.333	27.677	27.456	27.481	25.258	26.426	Night											2015-08-04	27.721	28.189	27.863	27.814	2015-08-04	27.558	27.606	27.523	27.551
2015-06-30 21:00:00	2015-06-30 21:00:00	27.308	27.628	27.456	27.481	25.307	26.402	Night											2015-08-05	27.66	27.871	27.936	27.85	2015-08-05	27.564	27.529	27.527	27.573
2015-06-30 21:15:00	2015-06-30 21:15:00	27.259	27.579	27.431	27.481	25.355	26.402	Night											2015-08-06	27.292	27.643	27.689	27.583	2015-08-06	27.325	27.224	27.285	27.32
2015-06-30 21:30:00	2015-06-30 21:30:00	27.21	27.53	27.407	27.456	25.477	26.426	Night											2015-08-07	28.128	28.579	28.448	28.373	2015-08-07	28.012	28.061	28.067	28.082
2015-06-30 21:45:00	2015-06-30 21:45:00	27.136	27.481	27.382	27.431	25.574	26.426	Night											2015-08-08	28.236	28.457	28.537	28.482	2015-08-08	28.209	28.206	28.224	28.261
2015-06-30 22:00:00	2015-06-30 22:00:00	27.112	27.456	27.333	27.407	25.623	26.426	Night											2015-08-09	28.105	28.324	28.48	28.411	2015-08-09	27.997	27.927	28.03	28.076
2015-06-30 22:15:00	2015-06-30 22:15:00	27.087	27.407	27.284	27.358	25.72	26.426	Night											2015-08-10	27.899	28.126	28.242	28.147	2015-08-10	27.769	27.752	27.871	27.922
2015-06-30 22:30:00	2015-06-30 22:30:00	27.087	27.382	27.259	27.333	25.793	26.426	Night											2015-08-11	27.903	28.276	28.181	28.076	2015-08-11	27.734	27.775	27.801	27.846
2015-06-30 22:45:00	2015-06-30 22:45:00	27.087	27.358	27.235	27.284	25.793	26.402	Night											2015-08-12	28.19	28.442	28.444	28.387	2015-08-12	27.994	27.949	28.035	28.068
2015-06-30 23:00:00	2015-06-30 23:00:00	27.063	27.333	27.186	27.259	25.671	26.378	Night											2015-08-13	28.32	28.581	28.572	28.509	2015-08-13	28.188	28.13	28.274	28.307
2015-06-30 23:15:00	2015-06-30 23:15:00	27.038	27.284	27.136	27.21	25.574	26.353	Night											2015-08-14	28.266	28.585	28.427	28.413	2015-08-14	28.139	28.173	28.197	28.229
2015-06-30 23:30:00	2015-06-30 23:30:00	27.014	27.235	27.087	27.161	25.55	26.304	Night											2015-08-15	28.27	28.587	28.442	28.457	2015-08-15	28.146	28.147	28.198	28.227
2015-06-30 23:45:00	2015-06-30 23:45:00	26.965	27.186	27.038	27.112	25.55	26.256	Night											2015-08-16	28.354	28.976	28.717	28.711	2015-08-16	28.149	28.372	28.266	28.308
2015-07-01	2015-07-01	26.94	27.136	26.989	27.063	25.574	26.182	Night											2015-08-17	28.236	28.484	28.364	28.335	2015-08-17	28.148	28.246	28.18	28.197
2015-07-01 00:15:00	2015-07-01 00:15:00	26.891	27.063	26.94	27.014	25.598	26.158	Night											2015-08-18	28.956	29.456	29.232	29.15	2015-08-18	28.799	28.939	28.89	28.917
2015-07-01 00:30:00	2015-07-01 00:30:00	26.842	27.014	26.891	26.965	25.623	26.158	Night											2015-08-19	29.021	29.338	29.209	29.112	2015-08-19	28.972	29.076	29.011	29.046
2015-07-01 00:45:00	2015-07-01 00:45:00	26.818	26.965	26.842	26.94	25.695	26.182	Night											2015-08-20	29	29.352	29.242	29.113	2015-08-20	28.77	29.084	28.896	28.949
2015-07-01 01:00:00	2015-07-01 01:00:00	26.769	26.891	26.793	26.891	25.695	26.207	Night											2015-08-21	28.975	29.286	29.196	29.146	2015-08-21	28.784	28.881	28.788	28.822
2015-07-01 01:15:00	2015-07-01 01:15:00	26.744	26.842	26.744	26.842	25.768	26.207	Night											2015-08-22	28.617	28.766	28.768	28.765	2015-08-22	28.674	28.71	28.676	28.696
2015-07-01 01:30:00	2015-07-01 01:30:00	26.72	26.769	26.695	26.793	25.817	26.207	Night											2015-08-23	28.545	28.809	28.753	28.719	2015-08-23	28.618	28.668	28.596	28.627
2015-07-01 01:45:00	2015-07-01 01:45:00	26.695	26.72	26.671	26.744	25.866	26.207	Night											2015-08-24	28.194	28.2	28.31	28.276	2015-08-24	28.288	28.224	28.278	28.313
2015-07-01 02:00:00	2015-07-01 02:00:00	26.671	26.671	26.646	26.695	25.939	26.182	Night											2015-08-25	28.539	28.703	28.719	28.667	2015-08-25	28.082	28.225	28.081	28.132
2015-07-01 02:15:00	2015-07-01 02:15:00	26.646	26.646	26.598	26.671	25.987	26.158	Night											2015-08-26	28.131	28.533	28.537	28.467	2015-08-26	27.8	27.938	27.808	27.849
2015-07-01 02:30:00	2015-07-01 02:30:00	26.646	26.598	26.573	26.646	26.012	26.182	Night											2015-08-27	28.391	28.891	28.805	28.738	2015-08-27	28.175	28.298	28.239	28.25
2015-07-01 02:45:00	2015-07-01 02:45:00	26.622	26.549	26.549	26.598	26.061	26.182	Night											2015-08-28	29.061	29.461	29.255	29.217	2015-08-28	28.871	29.019	28.916	28.944
2015-07-01 03:00:00	2015-07-01 03:00:00	26.598	26.5	26.5	26.573	26.061	26.182	Night											2015-08-29	29.05	29.346	29.169	29.146	2015-08-29	28.682	28.808	28.771	28.798
2015-07-01 03:15:00	2015-07-01 03:15:00	26.598	26.475	26.475	26.549	26.085	26.207	Night											2015-08-30	28.776	29.156	29.042	29.025	2015-08-30	28.702	28.871	28.793	28.827
2015-07-01 03:30:00	2015-07-01 03:30:00	26.573	26.451	26.451	26.5	26.085	26.207	Night											2015-08-31	28.505	28.969	28.749	28.766	2015-08-31	28.311	28.441	28.384	28.413
2015-07-01 03:45:00	2015-07-01 03:45:00	26.549	26.426	26.451	26.5	26.085	26.207	Night											2015-09-01	28.616	28.555	28.6	28.602	2015-09-01	28.419	28.352	28.37	28.388
2015-07-01 04:00:00	2015-07-01 04:00:00	26.549	26.402	26.426	26.475	26.085	26.231	Night											2015-09-02	28.989	29.227	29.138	29.119	2015-09-02	28.798	28.689	28.769	28.792
2015-07-01 04:15:00	2015-07-01 04:15:00	26.5	26.378	26.402	26.451	26.109	26.231	Night											2015-09-03	28.503	28.417	28.461	28.476	2015-09-03	28.475	28.374	28.406	28.428
2015-07-01 04:30:00	2015-07-01 04:30:00	26.5	26.353	26.402	26.451	26.109	26.256	Night											2015-09-04	28.621	28.893	28.841	28.803	2015-09-04	28.464	28.452	28.476	28.496
2015-07-01 04:45:00	2015-07-01 04:45:00	26.475	26.353	26.378	26.426	26.134	26.256	Night											2015-09-05	28.682	28.835	28.885	28.832	2015-09-05	28.619	28.598	28.616	28.642
2015-07-01 05:00:00	2015-07-01 05:00:00	26.451	26.353	26.353	26.402	26.134	26.256	Night											2015-09-06	28.776	28.985	28.996	28.95	2015-09-06	28.76	28.754	28.762	28.785
2015-07-01 05:15:00	2015-07-01 05:15:00	26.451	26.329	26.329	26.378	26.134	26.256	Night											2015-09-07	28.983	29.167	29.186	29.129	2015-09-07	28.945	28.962	28.962	28.991
2015-07-01 05:30:00	2015-07-01 05:30:00	26.426	26.304	26.304	26.353	26.134	26.256	Night											2015-09-08	29.152	29.296	29.369	29.346	2015-09-08	29.008	28.992	28.969	28.995
2015-07-01 05:45:00	2015-07-01 05:45:00	26.402	26.304	26.28	26.329	26.158	26.256	Night											2015-09-09	29.326	29.432	29.542	29.474	2015-09-09	29.243	29.299	29.278	29.31
2015-07-01 06:00:00	2015-07-01 06:00:00	26.402	26.28	26.256	26.304	26.158	26.256	Night											2015-09-10	29.328	29.442	29.704	29.632	2015-09-10	29.287	29.439	29.366	29.395
2015-07-01 06:15:00	2015-07-01 06:15:00	26.378	26.28	26.256	26.304	26.158	26.256	Night											2015-09-11	28.963	29.115	29.027	29.038	2015-09-11	28.901	28.96	28.902	28.937
2015-07-01 06:30:00	2015-07-01 06:30:00	26.353	26.256	26.231	26.28	26.158	26.256	Night											2015-09-12	28.417	28.669	28.593	28.535	2015-09-12	28.592	28.735	28.676	28.709
2015-07-01 06:45:00	2015-07-01 06:45:00	26.353	26.231	26.207	26.256	26.158	26.256	Night											2015-09-13	28.491	28.489	28.47	28.482	2015-09-13	28.529	28.481	28.479	28.505
2015-07-01 07:00:00	2015-07-01 07:00:00	26.329	26.231	26.207	26.256	26.061	26.256	Night											2015-09-14	28.744	28.921	28.763	28.774	2015-09-14	28.563	28.449	28.524	28.548
2015-07-01 07:15:00	2015-07-01 07:15:00	26.329	26.207	26.207	26.231	25.866	26.231	Night											2015-09-15	28.627	28.822	28.623	28.635	2015-09-15	28.469	28.415	28.425	28.448
2015-07-01 07:30:00	2015-07-01 07:30:00	26.304	26.231	26.231	26.231	25.744	26.231	Night											2015-09-16	28.449	28.834	28.583	28.572	2015-09-16	28.403	28.416	28.366	28.394
2015-07-01 07:45:00	2015-07-01 07:45:00	26.304	26.231	26.28	26.256	25.647	26.231	Night											2015-09-17	28.453	28.665	28.715	28.679	2015-09-17	28.402	28.318	28.341	28.37
2015-07-01 08:00:00	2015-07-01 08:00:00	26.304	26.256	26.329	26.256	25.598	26.256	Night											2015-09-18	28.503	28.723	28.64	28.644	2015-09-18	28.441	28.392	28.381	28.405
2015-07-01 08:15:00	2015-07-01 08:15:00	26.304	26.304	26.378	26.304	25.574	26.256	Night											2015-09-19	28.459	28.772	28.635	28.621	2015-09-19	28.422	28.419	28.405	28.432
2015-07-01 08:30:00	2015-07-01 08:30:00	26.329	26.353	26.451	26.329	25.525	26.256	Night											2015-09-20	28.574	28.814	28.82	28.811	2015-09-20	28.561	28.498	28.522	28.543
2015-07-01 08:45:00	2015-07-01 08:45:00	26.353	26.378	26.549	26.378	25.525	26.256	Night											2015-09-21	28.591	28.681	28.742	28.723	2015-09-21	28.669	28.598	28.633	28.653
2015-07-01 09:00:00	2015-07-01 09:00:00	26.402	26.426	26.598	26.426	25.525	26.256	Night											2015-09-22	28.692	28.835	28.854	28.853	2015-09-22	28.689	28.597	28.66	28.681
2015-07-01 09:15:00	2015-07-01 09:15:00	26.426	26.475	26.671	26.5	25.525	26.256	Night											2015-09-23	28.795	28.883	28.96	28.95	2015-09-23	28.71	28.618	28.705	28.726
2015-07-01 09:30:00	2015-07-01 09:30:00	26.475	26.549	26.72	26.549	25.453	26.231	Night											2015-09-24	28.782	28.929	29.275	29.24	2015-09-24	28.679	28.585	28.756	28.788
2015-07-01 09:45:00	2015-07-01 09:45:00	26.524	26.622	26.793	26.622	25.283	26.207	Night											2015-09-25	28.671	28.788	29.11	29.104	2015-09-25	28.619	28.418	28.544	28.568
2015-07-01 10:00:00	2015-07-01 10:00:00	26.573	26.72	26.842	26.695	25.186	26.182	Night											2015-09-26	28.615	28.669	28.73	28.732	2015-09-26	28.487	28.34	28.401	28.423
2015-07-01 10:15:00	2015-07-01 10:15:00	26.622	26.818	26.867	26.744	25.089	26.109	Night											2015-09-27	28.209	28.286	28.32	28.333	2015-09-27	28.143	28.025	28.051	28.073
2015-07-01 10:30:00	2015-07-01 10:30:00	26.671	26.916	26.867	26.793	25.089	26.061	Night											2015-09-28	27.907	28.048	28.103	28.112	2015-09-28	27.814	27.706	27.795	27.818
2015-07-01 10:45:00	2015-07-01 10:45:00	26.695	27.038	26.891	26.818	25.113	26.085	Night											2015-09-29	28.021	28.167	28.196	28.207	2015-09-29	27.779	27.687	27.668	27.688
2015-07-01 11:00:00	2015-07-01 11:00:00	26.744	27.136	26.891	26.842	25.162	26.134	Day											2015-09-30	27.922	28.204	28.15	28.149	2015-09-30	27.813	27.709	27.739	27.762
2015-07-01 11:15:00	2015-07-01 11:15:00	26.793	27.259	26.916	26.867	25.234	26.158	Day											2015-10-01	28.16	28.301	28.308	28.318	2015-10-01	27.845	27.797	27.764	27.789
2015-07-01 11:30:00	2015-07-01 11:30:00	26.818	27.358	26.916	26.891	25.307	26.158	Day											2015-10-02	27.972	28.126	28.131	28.124	2015-10-02	27.765	27.68	27.715	27.741
2015-07-01 11:45:00	2015-07-01 11:45:00	26.818	27.456	26.94	26.916	25.428	26.158	Day											2015-10-03	27.761	27.488	27.922	27.913	2015-10-03	27.587	27.504	27.5	27.524
2015-07-01 12:00:00	2015-07-01 12:00:00	26.842	27.481	26.965	26.94	25.525	26.158	Day											2015-10-04	27.569	27.49	27.901	27.896	2015-10-04	27.46	27.537	27.472	27.496
2015-07-01 12:15:00	2015-07-01 12:15:00	26.842	27.53	27.014	26.965	25.623	26.158	Day											2015-10-05	27.808	27.723	27.998	28.004	2015-10-05	27.606	27.631	27.582	27.606
2015-07-01 12:30:00	2015-07-01 12:30:00	26.891	27.554	27.087	26.989	25.72	26.158	Day											2015-10-06	27.535	27.405	27.768	27.767	2015-10-06	27.355	27.365	27.312	27.336
2015-07-01 12:45:00	2015-07-01 12:45:00	26.94	27.604	27.161	27.063	25.768	26.134	Day											2015-10-07	27.38	27.38	27.653	27.64	2015-10-07	27.307	27.339	27.288	27.312
2015-07-01 13:00:00	2015-07-01 13:00:00	27.014	27.628	27.259	27.136	25.817	26.109	Day											2015-10-08	27.356	27.361	27.592	27.588	2015-10-08	27.276	27.302	27.277	27.299
2015-07-01 13:15:00	2015-07-01 13:15:00	27.038	27.677	27.333	27.21	25.841	26.109	Day											2015-10-09	27.714	27.698	27.913	27.905	2015-10-09	27.517	27.555	27.51	27.529
2015-07-01 13:30:00	2015-07-01 13:30:00	27.063	27.653	27.456	27.333	25.866	26.109	Day											2015-10-10	27.77	27.784	28.101	28.086	2015-10-10	27.651	27.716	27.669	27.693
2015-07-01 13:45:00	2015-07-01 13:45:00	27.087	27.628	27.554	27.431	25.817	26.109	Day											2015-10-11	27.972	27.926	28.204	28.189	2015-10-11	27.778	27.86	27.791	27.817
2015-07-01 14:00:00	2015-07-01 14:00:00	27.112	27.628	27.653	27.554	25.598	26.109	Day											2015-10-12	27.678	27.717	27.666	27.679	2015-10-12	27.552	27.627	27.526	27.548
2015-07-01 14:15:00	2015-07-01 14:15:00	27.136	27.677	27.677	27.604	25.453	26.109	Night											2015-10-13	27.157	27.127	27.193	27.189	2015-10-13	27.31	27.343	27.282	27.305
2015-07-01 14:30:00	2015-07-01 14:30:00	27.161	27.727	27.677	27.653	25.404	26.085	Night											2015-10-14	27.515	27.646	27.723	27.732	2015-10-14	27.311	27.422	27.325	27.346
2015-07-01 14:45:00	2015-07-01 14:45:00	27.161	27.751	27.677	27.653	25.477	26.085	Night											2015-10-15	27.751	27.683	27.905	27.905	2015-10-15	27.568	27.627	27.534	27.555
2015-07-01 15:00:00	2015-07-01 15:00:00	27.186	27.801	27.677	27.653	25.671	26.109	Night											2015-10-16	28.025	27.917	28.162	28.171	2015-10-16	27.666	27.682	27.628	27.647
2015-07-01 15:15:00	2015-07-01 15:15:00	27.235	27.825	27.702	27.677	25.841	26.134	Night											2015-10-17	27.981	27.947	28.042	28.046	2015-10-17	27.849	27.945	27.871	27.891
2015-07-01 15:30:00	2015-07-01 15:30:00	27.308	27.875	27.751	27.751	25.963	26.182	Night											2015-10-18	28.099	28.154	28.187	28.198	2015-10-18	27.926	28.094	27.955	27.98
2015-07-01 15:45:00	2015-07-01 15:45:00	27.382	27.924	27.825	27.801	26.061	26.256	Night											2015-10-19	27.989	27.998	28.196	28.191	2015-10-19	27.762	27.955	27.768	27.793
2015-07-01 16:00:00	2015-07-01 16:00:00	27.431	27.974	27.899	27.875	26.109	26.329	Night											2015-10-20	27.725	27.805	27.882	27.888	2015-10-20	27.688	27.766	27.676	27.701
2015-07-01 16:15:00	2015-07-01 16:15:00	27.481	28.023	27.949	27.924	26.158	26.402	Night											2015-10-21	27.706	27.714	27.994	27.985	2015-10-21	27.594	27.673	27.592	27.614
2015-07-01 16:30:00	2015-07-01 16:30:00	27.505	28.048	27.974	27.974	26.207	26.451	Night											2015-10-22	27.786	27.805	28.042	28.042	2015-10-22	27.644	27.726	27.641	27.666
2015-07-01 16:45:00	2015-07-01 16:45:00	27.53	28.097	27.974	27.974	26.256	26.475	Night											2015-10-23	27.492	27.496	27.812	27.805	2015-10-23	27.362	27.435	27.327	27.354
2015-07-01 17:00:00	2015-07-01 17:00:00	27.505	28.122	27.949	27.974	26.231	26.5	Night											2015-10-24	26.969	27.095	27.193	27.189	2015-10-24	26.967	27.154	26.97	26.998
2015-07-01 17:15:00	2015-07-01 17:15:00	27.481	28.122	27.899	27.924	25.939	26.549	Night											2015-10-25	27.072	27.114	27.342	27.327	2015-10-25	26.972	27.153	26.944	26.972
2015-07-01 17:30:00	2015-07-01 17:30:00	27.456	28.122	27.825	27.875	25.647	26.573	Night											2015-10-26	27.044	27.031	27.477	27.473	2015-10-26	26.917	27.029	26.95	26.978
2015-07-01 17:45:00	2015-07-01 17:45:00	27.407	28.097	27.751	27.801	25.428	26.622	Night											2015-10-27	26.789	26.82	26.955	26.963	2015-10-27	26.783	26.817	26.708	26.729
2015-07-01 18:00:00	2015-07-01 18:00:00	27.358	28.072	27.677	27.727	25.283	26.622	Night											2015-10-28	27.031	26.982	27.231	27.252	2015-10-28	26.834	26.836	26.755	26.776
2015-07-01 18:15:00	2015-07-01 18:15:00	27.284	28.048	27.554	27.604	25.186	26.573	Night											2015-10-29	27.553	27.394	27.719	27.729	2015-10-29	27.101	27.185	27.07	27.099
2015-07-01 18:30:00	2015-07-01 18:30:00	27.259	27.998	27.456	27.53	25.04	26.5	Night											2015-10-30	26.889	27.091	27.087	27.097	2015-10-30	26.767	27.114	26.839	26.861
2015-07-01 18:45:00	2015-07-01 18:45:00	27.21	27.949	27.382	27.456	24.871	26.304	Night											2015-10-31	27.125	27.239	27.335	27.324	2015-10-31	27.085	27.325	27.152	27.176
2015-07-01 19:00:00	2015-07-01 19:00:00	27.161	27.875	27.333	27.407	24.774	26.036	Night											2015-11-01	27.29	27.45	27.526	27.537	2015-11-01	27.137	27.401	27.14	27.168
2015-07-01 19:15:00	2015-07-01 19:15:00	27.136	27.825	27.235	27.333	24.702	25.841	Night											2015-11-02	27.14	27.365	27.308	27.327	2015-11-02	27.107	27.26	27.115	27.135
2015-07-01 19:30:00	2015-07-01 19:30:00	27.087	27.727	27.186	27.259	24.702	25.72	Night											2015-11-03	27.057	27.195	27.223	27.229	2015-11-03	27.102	27.158	27.106	27.13
2015-07-01 19:45:00	2015-07-01 19:45:00	27.038	27.653	27.112	27.21	24.726	25.647	Night											2015-11-04	27.199	27.327	27.386	27.399	2015-11-04	27.154	27.147	27.128	27.15
2015-07-01 20:00:00	2015-07-01 20:00:00	26.989	27.554	27.063	27.136	24.774	25.623	Night											2015-11-05	27.119	27.127	27.203	27.208	2015-11-05	27.09	27.093	27.068	27.093
2015-07-01 20:15:00	2015-07-01 20:15:00	26.94	27.481	27.014	27.087	24.847	25.598	Night											2015-11-06	27.038	27.206	27.263	27.269	2015-11-06	26.997	26.974	26.955	26.978
2015-07-01 20:30:00	2015-07-01 20:30:00	26.867	27.382	26.989	27.063	24.726	25.574	Night											2015-11-07	26.874	27.068	27.086	27.089	2015-11-07	26.917	26.875	26.886	26.906
2015-07-01 20:45:00	2015-07-01 20:45:00	26.793	27.308	26.94	27.014	24.46	25.525	Night											2015-11-08	27.004	27.178	27.216	27.233	2015-11-08	26.916	26.837	26.878	26.9
2015-07-01 21:00:00	2015-07-01 21:00:00	26.72	27.235	26.891	26.965	24.315	25.477	Night											2015-11-09	26.918	27.074	27.052	27.061	2015-11-09	26.903	26.838	26.848	26.869
2015-07-01 21:15:00	2015-07-01 21:15:00	26.646	27.161	26.818	26.891	24.195	25.428	Night											2015-11-10	26.784	26.752	26.795	26.801	2015-11-10	26.802	26.686	26.736	26.757
2015-07-01 21:30:00	2015-07-01 21:30:00	26.549	27.087	26.744	26.842	24.098	25.355	Night											2015-11-11	26.985	26.976	27.093	27.106	2015-11-11	26.802	26.742	26.773	26.793
2015-07-01 21:45:00	2015-07-01 21:45:00	26.475	27.014	26.671	26.744	24.026	25.258	Night											2015-11-12	26.814	26.871	26.814	26.838	2015-11-12	26.696	26.64	26.629	26.65
2015-07-01 22:00:00	2015-07-01 22:00:00	26.402	26.965	26.598	26.695	24.002	25.186	Night											2015-11-13	26.778	26.81	26.835	26.859	2015-11-13	26.588	26.51	26.504	26.526
2015-07-01 22:15:00	2015-07-01 22:15:00	26.304	26.891	26.524	26.622	24.026	25.137	Night											2015-11-14	26.786	26.731	26.857	26.889	2015-11-14	26.597	26.476	26.503	26.525
2015-07-01 22:30:00	2015-07-01 22:30:00	26.231	26.842	26.451	26.549	24.074	25.089	Night											2015-11-15	26.612	26.513	26.645	26.671	2015-11-15	26.409	26.291	26.303	26.325
2015-07-01 22:45:00	2015-07-01 22:45:00	26.158	26.793	26.378	26.475	24.171	25.089	Night											2015-11-16	26.624	26.556	26.711	26.727	2015-11-16	26.459	26.357	26.363	26.385
2015-07-01 23:00:00	2015-07-01 23:00:00	26.061	26.744	26.28	26.378	24.267	25.065	Night											2015-11-17	26.588	26.68	26.693	26.716	2015-11-17	26.454	26.477	26.407	26.432
2015-07-01 23:15:00	2015-07-01 23:15:00	25.987	26.671	26.182	26.304	24.339	25.065	Night											2015-11-18	26.765	26.773	26.882	26.88	2015-11-18	26.559	26.549	26.497	26.52
2015-07-01 23:30:00	2015-07-01 23:30:00	25.89	26.622	26.109	26.207	24.388	25.065	Night											2015-11-19	26.737	26.752	26.818	26.84	2015-11-19	26.608	26.573	26.57	26.592
2015-07-01 23:45:00	2015-07-01 23:45:00	25.817	26.573	26.012	26.134	24.46	25.04	Night											2015-11-20	26.235	26.122	26.16	26.175	2015-11-20	26.257	26.174	26.187	26.205
2015-07-02	2015-07-02	25.744	26.5	25.939	26.061	24.484	25.04	Night											2015-11-21	26.395	26.334	26.409	26.419	2015-11-21	26.289	26.262	26.246	26.267
2015-07-02 00:15:00	2015-07-02 00:15:00	25.695	26.451	25.841	25.963	24.557	25.016	Night											2015-11-22	26.137	26.158	26.197	26.205	2015-11-22	26.102	26.122	26.08	26.101
2015-07-02 00:30:00	2015-07-02 00:30:00	25.623	26.378	25.768	25.89	24.581	24.992	Night											2015-11-23	26.158	26.132	26.261	26.258	2015-11-23	26.074	26.115	26.025	26.049
2015-07-02 00:45:00	2015-07-02 00:45:00	25.574	26.304	25.72	25.817	24.629	24.992	Night											2015-11-24	26.031	25.95	26.109	26.106	2015-11-24	25.942	25.935	25.837	25.865
2015-07-02 01:00:00	2015-07-02 01:00:00	25.525	26.207	25.671	25.768	24.653	24.992	Night											2015-11-25	26.412	26.233	26.556	26.558	2015-11-25	26.01	26.037	25.998	26.027
2015-07-02 01:15:00	2015-07-02 01:15:00	25.477	26.134	25.623	25.72	24.653	24.992	Night											2015-11-26	26.158	26.124	26.295	26.297	2015-11-26	26.037	25.987	25.872	25.892
2015-07-02 01:30:00	2015-07-02 01:30:00	25.428	26.061	25.598	25.671	24.629	24.992	Night											2015-11-27	26.145	26.297	26.361	26.378	2015-11-27	26.079	26.023	26.002	26.023
2015-07-02 01:45:00	2015-07-02 01:45:00	25.404	25.963	25.574	25.623	24.677	24.992	Night											2015-11-28	26.177	26.212	26.391	26.417	2015-11-28	26.048	26.026	25.993	26.021
2015-07-02 02:00:00	2015-07-02 02:00:00	25.38	25.914	25.525	25.574	24.798	24.992	Night											2015-11-29	26.211	26.229	26.423	26.453	2015-11-29	26.099	26.039	26.072	26.093
2015-07-02 02:15:00	2015-07-02 02:15:00	25.355	25.841	25.477	25.525	24.871	25.016	Night											2015-11-30	26.25	26.314	26.421	26.445	2015-11-30	26.177	26.123	26.12	26.143
2015-07-02 02:30:00	2015-07-02 02:30:00	25.331	25.768	25.428	25.501	24.895	25.065	Night											2015-12-01	26.263	26.246	26.387	26.406	2015-12-01	26.174	26.125	26.127	26.154
2015-07-02 02:45:00	2015-07-02 02:45:00	25.38	25.72	25.404	25.453	24.895	25.137	Night											2015-12-02	26.134	26.12	26.233	26.243	2015-12-02	26.089	26.06	26.03	26.056
2015-07-02 03:00:00	2015-07-02 03:00:00	25.404	25.671	25.38	25.428	24.919	25.186	Night											2015-12-03	26.089	26.051	26.19	26.218	2015-12-03	25.959	25.937	25.915	25.939
2015-07-02 03:15:00	2015-07-02 03:15:00	25.477	25.623	25.38	25.404	24.992	25.283	Night											2015-12-04	26.038	26.04	26.139	26.149	2015-12-04	25.95	25.884	25.86	25.886
2015-07-02 03:30:00	2015-07-02 03:30:00	25.55	25.574	25.428	25.428	25.04	25.38	Night											2015-12-05	26.01	26.094	26.248	26.267	2015-12-05	25.971	26.028	25.92	25.941
2015-07-02 03:45:00	2015-07-02 03:45:00	25.623	25.525	25.501	25.477	25.113	25.453	Night											2015-12-06	26.014	26.061	26.137	26.16	2015-12-06	25.966	26.018	25.92	25.945
2015-07-02 04:00:00	2015-07-02 04:00:00	25.671	25.501	25.574	25.525	25.186	25.525	Night											2015-12-07	26.306	26.331	26.444	26.457	2015-12-07	26.069	26.1	25.979	26.005
2015-07-02 04:15:00	2015-07-02 04:15:00	25.744	25.477	25.623	25.574	25.21	25.525	Night											2015-12-08	26.104	26.231	26.244	26.265	2015-12-08	26.051	26.055	25.962	25.982
2015-07-02 04:30:00	2015-07-02 04:30:00	25.793	25.453	25.671	25.623	25.258	25.55	Night											2015-12-09	26.046	25.986	26.113	26.126	2015-12-09	25.987	25.917	25.868	25.892
2015-07-02 04:45:00	2015-07-02 04:45:00	25.817	25.428	25.72	25.671	25.283	25.574	Night											2015-12-10	26.059	26.064	26.175	26.196	2015-12-10	25.929	25.908	25.861	25.879
2015-07-02 05:00:00	2015-07-02 05:00:00	25.841	25.404	25.744	25.72	25.331	25.598	Night											2015-12-11	26.1	26.209	26.261	26.282	2015-12-11	26.13	26.097	26.074	26.097
2015-07-02 05:15:00	2015-07-02 05:15:00	25.866	25.404	25.744	25.72	25.38	25.598	Night											2015-12-12	26.539	26.72	26.701	26.733	2015-12-12	26.402	26.488	26.363	26.392
2015-07-02 05:30:00	2015-07-02 05:30:00	25.866	25.404	25.72	25.72	25.428	25.623	Night											2015-12-13	26.479	26.724	26.588	26.652	2015-12-13	26.242	26.381	26.168	26.199
2015-07-02 05:45:00	2015-07-02 05:45:00	25.866	25.404	25.72	25.72	25.453	25.623	Night											2015-12-14	26.087	26.126	26.235	26.243	2015-12-14	25.953	26.06	25.899	25.924
2015-07-02 06:00:00	2015-07-02 06:00:00	25.866	25.428	25.695	25.72	25.477	25.647	Night											2015-12-15	26.314	26.367	26.459	26.49	2015-12-15	26.138	26.125	26.062	26.088
2015-07-02 06:15:00	2015-07-02 06:15:00	25.866	25.428	25.695	25.72	25.525	25.671	Night											2015-12-16	25.982	25.967	26.096	26.121	2015-12-16	25.99	25.904	25.899	25.924
2015-07-02 06:30:00	2015-07-02 06:30:00	25.866	25.453	25.695	25.72	25.55	25.671	Night											2015-12-17	25.69	25.563	25.782	25.798	2015-12-17	25.673	25.566	25.553	25.58
2015-07-02 06:45:00	2015-07-02 06:45:00	25.866	25.477	25.695	25.72	25.574	25.695	Night											2015-12-18	25.697	25.522	25.782	25.783	2015-12-18	25.636	25.496	25.517	25.54
2015-07-02 07:00:00	2015-07-02 07:00:00	25.89	25.501	25.695	25.72	25.598	25.72	Night											2015-12-19	25.589	25.439	25.598	25.611	2015-12-19	25.599	25.427	25.453	25.475
2015-07-02 07:15:00	2015-07-02 07:15:00	25.89	25.525	25.72	25.72	25.647	25.744	Night											2015-12-20	25.594	25.372	25.557	25.574	2015-12-20	25.487	25.32	25.345	25.365
2015-07-02 07:30:00	2015-07-02 07:30:00	25.914	25.55	25.744	25.744	25.671	25.768	Night											2015-12-21	25.552	25.4	25.61	25.619	2015-12-21	25.489	25.334	25.37	25.391
2015-07-02 07:45:00	2015-07-02 07:45:00	25.939	25.574	25.768	25.768	25.72	25.817	Night											2015-12-22	25.677	25.585	25.753	25.765	2015-12-22	25.61	25.48	25.507	25.53
2015-07-02 08:00:00	2015-07-02 08:00:00	25.963	25.623	25.841	25.793	25.744	25.841	Night											2015-12-23	25.767	25.823	25.969	25.986	2015-12-23	25.671	25.677	25.622	25.649
2015-07-02 08:15:00	2015-07-02 08:15:00	25.987	25.647	25.89	25.817	25.768	25.866	Night											2015-12-24	25.808	25.828	25.995	26.012	2015-12-24	25.735	25.731	25.672	25.697
2015-07-02 08:30:00	2015-07-02 08:30:00	26.012	25.695	25.963	25.866	25.793	25.89	Night											2015-12-25	25.817	25.916	26.025	26.066	2015-12-25	25.766	25.686	25.701	25.727
2015-07-02 08:45:00	2015-07-02 08:45:00	26.061	25.768	26.061	25.939	25.793	25.939	Night											2015-12-26	25.488	25.529	25.57	25.583	2015-12-26	25.457	25.364	25.425	25.449
2015-07-02 09:00:00	2015-07-02 09:00:00	26.085	25.817	26.158	26.012	25.817	25.987	Night											2015-12-27	25.316	25.494	25.492	25.499	2015-12-27	25.321	25.306	25.287	25.311
2015-07-02 09:15:00	2015-07-02 09:15:00	26.134	25.89	26.256	26.085	25.866	26.036	Night											2015-12-28	25.367	25.492	25.451	25.471	2015-12-28	25.389	25.418	25.388	25.411
2015-07-02 09:30:00	2015-07-02 09:30:00	26.182	25.963	26.353	26.158	25.914	26.085	Night											2015-12-29	25.546	25.658	25.658	25.684	2015-12-29	25.381	25.406	25.317	25.34
2015-07-02 09:45:00	2015-07-02 09:45:00	26.256	26.061	26.451	26.256	25.963	26.134	Night											2015-12-30	25.628	25.486	25.671	25.681	2015-12-30	25.418	25.348	25.311	25.336
2015-07-02 10:00:00	2015-07-02 10:00:00	26.304	26.158	26.524	26.353	26.012	26.158	Night											2015-12-31	25.647	25.711	25.767	25.765	2015-12-31	25.495	25.519	25.433	25.462
2015-07-02 10:15:00	2015-07-02 10:15:00	26.353	26.256	26.622	26.451	26.061	26.207	Night											2016-01-01	25.645	25.587	25.705	25.722	2016-01-01	25.509	25.44	25.38	25.412
2015-07-02 10:30:00	2015-07-02 10:30:00	26.426	26.402	26.695	26.549	26.085	26.28	Night											2016-01-02	25.292	25.18	25.318	25.32	2016-01-02	25.197	25.122	25.045	25.078
2015-07-02 10:45:00	2015-07-02 10:45:00	26.475	26.524	26.769	26.646	26.109	26.329	Night											2016-01-03	25.162	25.143	25.162	25.167	2016-01-03	25.156	25.062	25.048	25.076
2015-07-02 11:00:00	2015-07-02 11:00:00	26.549	26.646	26.818	26.72	26.158	26.402	Day											2016-01-04	25.091	25.076	25.214	25.225	2016-01-04	25.026	24.966	24.885	24.922
2015-07-02 11:15:00	2015-07-02 11:15:00	26.598	26.744	26.867	26.769	26.182	26.451	Day											2016-01-05	25.18	25.104	25.259	25.266	2016-01-05	25.041	24.963	24.913	24.947
2015-07-02 11:30:00	2015-07-02 11:30:00	26.646	26.867	26.891	26.818	26.207	26.475	Day											2016-01-06	24.983	25.137	25.124	25.141	2016-01-06	25.001	24.992	24.955	24.98
2015-07-02 11:45:00	2015-07-02 11:45:00	26.695	26.989	26.916	26.867	26.256	26.5	Day											2016-01-07	25.249	25.421	25.497	25.503	2016-01-07	25.083	25.208	25.043	25.077
2015-07-02 12:00:00	2015-07-02 12:00:00	26.744	27.136	26.965	26.891	26.28	26.549	Day											2016-01-08	25.335	25.382	25.522	25.511	2016-01-08	25.232	25.316	25.23	25.257
2015-07-02 12:15:00	2015-07-02 12:15:00	26.793	27.259	27.014	26.94	26.28	26.549	Day											2016-01-09	25.352	25.298	25.514	25.512	2016-01-09	25.342	25.447	25.354	25.39
2015-07-02 12:30:00	2015-07-02 12:30:00	26.842	27.382	27.087	27.014	26.28	26.598	Day											2016-01-10	25.408	25.447	25.542	25.539	2016-01-10	25.294	25.421	25.255	25.288
2015-07-02 12:45:00	2015-07-02 12:45:00	26.867	27.505	27.161	27.063	26.28	26.622	Day											2016-01-11	25.177	25.016	25.095	25.078	2016-01-11	25.184	25.169	25.104	25.133
2015-07-02 13:00:00	2015-07-02 13:00:00	26.916	27.604	27.235	27.136	26.28	26.646	Day
2015-07-02 13:15:00	2015-07-02 13:15:00	26.965	27.702	27.308	27.21	26.304	26.646	Day
2015-07-02 13:30:00	2015-07-02 13:30:00	27.063	27.776	27.358	27.284	26.304	26.622	Day
2015-07-02 13:45:00	2015-07-02 13:45:00	27.161	27.825	27.431	27.358	26.304	26.622	Day
2015-07-02 14:00:00	2015-07-02 14:00:00	27.259	27.875	27.505	27.431	26.329	26.622	Day
2015-07-02 14:15:00	2015-07-02 14:15:00	27.333	27.899	27.579	27.505	26.353	26.598	Night
2015-07-02 14:30:00	2015-07-02 14:30:00	27.382	27.924	27.677	27.604	26.378	26.598	Night
2015-07-02 14:45:00	2015-07-02 14:45:00	27.407	27.949	27.776	27.677	26.402	26.598	Night
2015-07-02 15:00:00	2015-07-02 15:00:00	27.431	27.974	27.825	27.751	26.426	26.598	Night
2015-07-02 15:15:00	2015-07-02 15:15:00	27.456	27.974	27.875	27.825	26.451	26.598	Night
2015-07-02 15:30:00	2015-07-02 15:30:00	27.481	27.998	27.924	27.875	26.5	26.622	Night
2015-07-02 15:45:00	2015-07-02 15:45:00	27.53	28.023	27.949	27.924	26.5	26.646	Night
2015-07-02 16:00:00	2015-07-02 16:00:00	27.554	28.023	27.949	27.924	26.524	26.646	Night
2015-07-02 16:15:00	2015-07-02 16:15:00	27.579	28.048	27.949	27.949	26.256	26.671	Night
2015-07-02 16:30:00	2015-07-02 16:30:00	27.628	28.072	27.974	27.974	26.036	26.671	Night
2015-07-02 16:45:00	2015-07-02 16:45:00	27.653	28.122	27.974	27.974	25.89	26.671	Night
2015-07-02 17:00:00	2015-07-02 17:00:00	27.677	28.122	27.974	27.974	25.768	26.646	Night
2015-07-02 17:15:00	2015-07-02 17:15:00	27.702	28.171	27.974	27.974	25.695	26.475	Night
2015-07-02 17:30:00	2015-07-02 17:30:00	27.727	28.196	27.974	27.974	25.623	26.28	Night
2015-07-02 17:45:00	2015-07-02 17:45:00	27.751	28.221	27.974	27.974	25.574	26.109	Night
2015-07-02 18:00:00	2015-07-02 18:00:00	27.751	28.245	27.949	27.974	25.55	25.963	Night
2015-07-02 18:15:00	2015-07-02 18:15:00	27.727	28.245	27.924	27.949	25.525	25.841	Night
2015-07-02 18:30:00	2015-07-02 18:30:00	27.702	28.245	27.899	27.924	25.525	25.768	Night
2015-07-02 18:45:00	2015-07-02 18:45:00	27.653	28.221	27.85	27.875	25.501	25.72	Night
2015-07-02 19:00:00	2015-07-02 19:00:00	27.604	28.196	27.801	27.825	25.501	25.695	Night
2015-07-02 19:15:00	2015-07-02 19:15:00	27.53	28.171	27.727	27.776	25.525	25.671	Night
2015-07-02 19:30:00	2015-07-02 19:30:00	27.431	28.122	27.677	27.727	25.525	25.671	Night
2015-07-02 19:45:00	2015-07-02 19:45:00	27.333	28.072	27.604	27.677	25.525	25.671	Night
2015-07-02 20:00:00	2015-07-02 20:00:00	27.235	28.023	27.505	27.579	25.55	25.671	Night
2015-07-02 20:15:00	2015-07-02 20:15:00	27.136	27.974	27.407	27.505	25.55	25.72	Night
2015-07-02 20:30:00	2015-07-02 20:30:00	27.063	27.924	27.333	27.407	25.38	25.768	Night
2015-07-02 20:45:00	2015-07-02 20:45:00	27.063	27.899	27.235	27.333	25.089	25.817	Night
2015-07-02 21:00:00	2015-07-02 21:00:00	27.063	27.85	27.161	27.259	24.798	25.817	Night
2015-07-02 21:15:00	2015-07-02 21:15:00	27.063	27.801	27.112	27.186	24.557	25.768	Night
2015-07-02 21:30:00	2015-07-02 21:30:00	27.087	27.751	27.087	27.161	24.412	25.55	Night
2015-07-02 21:45:00	2015-07-02 21:45:00	27.112	27.702	27.063	27.136	24.219	25.331	Night
2015-07-02 22:00:00	2015-07-02 22:00:00	27.087	27.628	27.063	27.112	24.122	25.113	Night
2015-07-02 22:15:00	2015-07-02 22:15:00	27.038	27.579	27.014	27.063	24.122	24.992	Night
2015-07-02 22:30:00	2015-07-02 22:30:00	26.916	27.505	26.94	27.014	24.146	24.895	Night
2015-07-02 22:45:00	2015-07-02 22:45:00	26.793	27.431	26.842	26.916	24.171	24.895	Night
2015-07-02 23:00:00	2015-07-02 23:00:00	26.646	27.358	26.72	26.842	24.195	24.919	Night
2015-07-02 23:15:00	2015-07-02 23:15:00	26.524	27.308	26.622	26.744	24.219	24.919	Night
2015-07-02 23:30:00	2015-07-02 23:30:00	26.402	27.235	26.524	26.646	24.267	24.895	Night
2015-07-02 23:45:00	2015-07-02 23:45:00	26.353	27.186	26.451	26.549	24.291	24.871	Night
2015-07-03	2015-07-03	26.304	27.136	26.402	26.5	24.315	24.847	Night
2015-07-03 00:15:00	2015-07-03 00:15:00	26.256	27.087	26.353	26.451	24.339	24.847	Night
2015-07-03 00:30:00	2015-07-03 00:30:00	26.231	27.014	26.353	26.402	24.388	24.823	Night
2015-07-03 00:45:00	2015-07-03 00:45:00	26.182	26.94	26.329	26.378	24.412	24.798	Night
2015-07-03 01:00:00	2015-07-03 01:00:00	26.109	26.867	26.28	26.353	24.436	24.774	Night
2015-07-03 01:15:00	2015-07-03 01:15:00	25.987	26.793	26.207	26.28	24.46	24.75	Night
2015-07-03 01:30:00	2015-07-03 01:30:00	25.866	26.72	26.109	26.207	24.484	24.726	Night
2015-07-03 01:45:00	2015-07-03 01:45:00	25.768	26.646	26.012	26.134	24.557	24.75	Night
2015-07-03 02:00:00	2015-07-03 02:00:00	25.695	26.549	25.914	26.036	24.653	24.823	Night
2015-07-03 02:15:00	2015-07-03 02:15:00	25.647	26.475	25.841	25.963	24.871	24.944	Night
2015-07-03 02:30:00	2015-07-03 02:30:00	25.598	26.378	25.793	25.89	25.04	25.089	Night
2015-07-03 02:45:00	2015-07-03 02:45:00	25.598	26.28	25.72	25.817	25.089	25.234	Night
2015-07-03 03:00:00	2015-07-03 03:00:00	25.574	26.207	25.671	25.768	25.089	25.331	Night
2015-07-03 03:15:00	2015-07-03 03:15:00	25.574	26.134	25.647	25.72	25.162	25.428	Night
2015-07-03 03:30:00	2015-07-03 03:30:00	25.598	26.061	25.623	25.671	25.186	25.525	Night
2015-07-03 03:45:00	2015-07-03 03:45:00	25.647	25.987	25.598	25.671	25.234	25.671	Night
2015-07-03 04:00:00	2015-07-03 04:00:00	25.695	25.939	25.623	25.647	25.283	25.793	Night
2015-07-03 04:15:00	2015-07-03 04:15:00	25.768	25.866	25.623	25.647	25.355	25.89	Night
2015-07-03 04:30:00	2015-07-03 04:30:00	25.841	25.841	25.671	25.671	25.453	25.939	Night
2015-07-03 04:45:00	2015-07-03 04:45:00	25.89	25.793	25.72	25.695	25.55	25.987	Night
2015-07-03 05:00:00	2015-07-03 05:00:00	25.963	25.768	25.768	25.744	25.623	26.012	Night
2015-07-03 05:15:00	2015-07-03 05:15:00	26.036	25.768	25.841	25.793	25.671	26.085	Night
2015-07-03 05:30:00	2015-07-03 05:30:00	26.109	25.768	25.89	25.841	25.744	26.134	Night
2015-07-03 05:45:00	2015-07-03 05:45:00	26.158	25.744	25.939	25.89	25.793	26.182	Night
2015-07-03 06:00:00	2015-07-03 06:00:00	26.207	25.72	25.987	25.939	25.841	26.207	Night
2015-07-03 06:15:00	2015-07-03 06:15:00	26.231	25.72	26.036	25.987	25.914	26.231	Night
2015-07-03 06:30:00	2015-07-03 06:30:00	26.256	25.72	26.061	26.036	25.963	26.231	Night
2015-07-03 06:45:00	2015-07-03 06:45:00	26.28	25.744	26.109	26.085	25.987	26.231	Night
2015-07-03 07:00:00	2015-07-03 07:00:00	26.304	25.768	26.158	26.109	26.036	26.231	Night
2015-07-03 07:15:00	2015-07-03 07:15:00	26.329	25.793	26.207	26.158	26.061	26.231	Night
2015-07-03 07:30:00	2015-07-03 07:30:00	26.353	25.841	26.256	26.207	26.085	26.256	Night
2015-07-03 07:45:00	2015-07-03 07:45:00	26.378	25.89	26.28	26.231	26.109	26.28	Night
2015-07-03 08:00:00	2015-07-03 08:00:00	26.378	25.939	26.329	26.28	26.134	26.304	Night
2015-07-03 08:15:00	2015-07-03 08:15:00	26.402	25.987	26.378	26.304	26.036	26.353	Night
2015-07-03 08:30:00	2015-07-03 08:30:00	26.426	26.061	26.426	26.353	25.866	26.378	Night
2015-07-03 08:45:00	2015-07-03 08:45:00	26.451	26.134	26.5	26.402	25.744	26.402	Night
2015-07-03 09:00:00	2015-07-03 09:00:00	26.5	26.207	26.573	26.451	25.671	26.426	Night
2015-07-03 09:15:00	2015-07-03 09:15:00	26.549	26.28	26.646	26.524	25.647	26.426	Night
2015-07-03 09:30:00	2015-07-03 09:30:00	26.573	26.353	26.744	26.598	25.623	26.402	Night
2015-07-03 09:45:00	2015-07-03 09:45:00	26.622	26.451	26.842	26.671	25.623	26.402	Night
2015-07-03 10:00:00	2015-07-03 10:00:00	26.671	26.524	26.94	26.769	25.623	26.378	Night
2015-07-03 10:15:00	2015-07-03 10:15:00	26.72	26.622	27.038	26.867	25.647	26.402	Night
2015-07-03 10:30:00	2015-07-03 10:30:00	26.769	26.72	27.136	26.989	25.647	26.402	Night
2015-07-03 10:45:00	2015-07-03 10:45:00	26.818	26.842	27.21	27.063	25.671	26.426	Night
2015-07-03 11:00:00	2015-07-03 11:00:00	26.867	26.94	27.284	27.161	25.695	26.475	Day
2015-07-03 11:15:00	2015-07-03 11:15:00	26.94	27.063	27.333	27.21	25.72	26.549	Day
2015-07-03 11:30:00	2015-07-03 11:30:00	26.989	27.186	27.358	27.284	25.768	26.622	Day
2015-07-03 11:45:00	2015-07-03 11:45:00	27.014	27.308	27.382	27.308	25.793	26.72	Day
2015-07-03 12:00:00	2015-07-03 12:00:00	27.038	27.407	27.382	27.333	25.817	26.793	Day
2015-07-03 12:15:00	2015-07-03 12:15:00	27.063	27.53	27.382	27.333	25.866	26.793	Day
2015-07-03 12:30:00	2015-07-03 12:30:00	27.063	27.628	27.333	27.333	25.939	26.793	Day
2015-07-03 12:45:00	2015-07-03 12:45:00	27.038	27.702	27.308	27.308	26.012	26.769	Day
2015-07-03 13:00:00	2015-07-03 13:00:00	27.038	27.776	27.259	27.284	26.085	26.769	Day
2015-07-03 13:15:00	2015-07-03 13:15:00	27.014	27.825	27.186	27.235	26.134	26.72	Day
2015-07-03 13:30:00	2015-07-03 13:30:00	26.989	27.825	27.161	27.186	26.182	26.671	Day
2015-07-03 13:45:00	2015-07-03 13:45:00	26.989	27.801	27.112	27.161	26.207	26.622	Day
2015-07-03 14:00:00	2015-07-03 14:00:00	26.989	27.751	27.087	27.112	26.207	26.622	Day
2015-07-03 14:15:00	2015-07-03 14:15:00	26.965	27.702	27.063	27.087	26.231	26.622	Night
2015-07-03 14:30:00	2015-07-03 14:30:00	26.94	27.628	27.038	27.063	26.231	26.646	Night
2015-07-03 14:45:00	2015-07-03 14:45:00	26.94	27.579	27.014	27.038	26.256	26.646	Night
2015-07-03 15:00:00	2015-07-03 15:00:00	26.916	27.53	27.014	27.038	26.256	26.646	Night
2015-07-03 15:15:00	2015-07-03 15:15:00	26.891	27.481	26.989	27.014	26.256	26.646	Night
2015-07-03 15:30:00	2015-07-03 15:30:00	26.867	27.456	26.965	26.989	26.207	26.622	Night
2015-07-03 15:45:00	2015-07-03 15:45:00	26.867	27.431	26.965	26.965	26.182	26.598	Night
2015-07-03 16:00:00	2015-07-03 16:00:00	26.867	27.407	26.965	26.965	26.158	26.573	Night
2015-07-03 16:15:00	2015-07-03 16:15:00	26.867	27.382	26.965	26.989	26.109	26.549	Night
2015-07-03 16:30:00	2015-07-03 16:30:00	26.891	27.382	27.014	27.014	26.061	26.524	Night
2015-07-03 16:45:00	2015-07-03 16:45:00	26.916	27.382	27.038	27.038	26.012	26.5	Night
2015-07-03 17:00:00	2015-07-03 17:00:00	26.965	27.382	27.087	27.087	26.061	26.5	Night
2015-07-03 17:15:00	2015-07-03 17:15:00	26.989	27.382	27.112	27.112	26.109	26.5	Night
2015-07-03 17:30:00	2015-07-03 17:30:00	26.989	27.407	27.136	27.136	26.061	26.5	Night
2015-07-03 17:45:00	2015-07-03 17:45:00	27.014	27.431	27.161	27.161	25.841	26.549	Night
2015-07-03 18:00:00	2015-07-03 18:00:00	27.014	27.456	27.186	27.186	25.598	26.549	Night
2015-07-03 18:15:00	2015-07-03 18:15:00	26.989	27.481	27.186	27.186	25.428	26.475	Night
2015-07-03 18:30:00	2015-07-03 18:30:00	26.989	27.481	27.186	27.186	25.307	26.28	Night
2015-07-03 18:45:00	2015-07-03 18:45:00	26.989	27.456	27.136	27.161	25.258	26.134	Night
2015-07-03 19:00:00	2015-07-03 19:00:00	26.989	27.431	27.112	27.136	25.21	26.036	Night
2015-07-03 19:15:00	2015-07-03 19:15:00	26.989	27.382	27.087	27.112	25.234	26.036	Night
2015-07-03 19:30:00	2015-07-03 19:30:00	26.989	27.333	27.038	27.087	25.283	26.134	Night
2015-07-03 19:45:00	2015-07-03 19:45:00	26.965	27.259	27.038	27.063	25.38	26.231	Night
2015-07-03 20:00:00	2015-07-03 20:00:00	26.94	27.186	26.989	27.038	25.355	26.329	Night
2015-07-03 20:15:00	2015-07-03 20:15:00	26.891	27.136	26.94	26.989	24.992	26.353	Night
2015-07-03 20:30:00	2015-07-03 20:30:00	26.842	27.087	26.891	26.94	24.605	26.231	Night
2015-07-03 20:45:00	2015-07-03 20:45:00	26.793	27.063	26.818	26.891	24.363	25.939	Night
2015-07-03 21:00:00	2015-07-03 21:00:00	26.769	27.014	26.744	26.818	24.219	25.574	Night
2015-07-03 21:15:00	2015-07-03 21:15:00	26.744	26.965	26.695	26.769	24.074	25.137	Night
2015-07-03 21:30:00	2015-07-03 21:30:00	26.744	26.94	26.671	26.744	23.954	24.798	Night
2015-07-03 21:45:00	2015-07-03 21:45:00	26.72	26.867	26.671	26.72	23.857	24.581	Night
2015-07-03 22:00:00	2015-07-03 22:00:00	26.671	26.818	26.671	26.72	23.785	24.436	Night
2015-07-03 22:15:00	2015-07-03 22:15:00	26.573	26.769	26.646	26.695	23.713	24.339	Night
2015-07-03 22:30:00	2015-07-03 22:30:00	26.451	26.744	26.549	26.622	23.665	24.267	Night
2015-07-03 22:45:00	2015-07-03 22:45:00	26.329	26.695	26.426	26.524	23.641	24.195	Night
2015-07-03 23:00:00	2015-07-03 23:00:00	26.182	26.646	26.256	26.378	23.641	24.122	Night
2015-07-03 23:15:00	2015-07-03 23:15:00	26.036	26.622	26.085	26.231	23.617	24.05	Night
2015-07-03 23:30:00	2015-07-03 23:30:00	25.89	26.573	25.963	26.109	23.641	23.978	Night
2015-07-03 23:45:00	2015-07-03 23:45:00	25.768	26.549	25.866	25.987	23.665	23.954	Night
2015-07-04	2015-07-04	25.647	26.475	25.793	25.914	23.713	23.954	Night
2015-07-04 00:15:00	2015-07-04 00:15:00	25.55	26.426	25.768	25.866	23.761	23.978	Night
2015-07-04 00:30:00	2015-07-04 00:30:00	25.477	26.353	25.72	25.817	23.785	24.026	Night
2015-07-04 00:45:00	2015-07-04 00:45:00	25.38	26.28	25.671	25.744	23.833	24.122	Night
2015-07-04 01:00:00	2015-07-04 01:00:00	25.258	26.207	25.598	25.671	23.93	24.219	Night
2015-07-04 01:15:00	2015-07-04 01:15:00	25.162	26.109	25.501	25.623	24.026	24.339	Night
2015-07-04 01:30:00	2015-07-04 01:30:00	25.065	26.036	25.428	25.525	24.098	24.484	Night
2015-07-04 01:45:00	2015-07-04 01:45:00	24.992	25.939	25.331	25.453	24.171	24.629	Night
2015-07-04 02:00:00	2015-07-04 02:00:00	24.944	25.866	25.258	25.38	24.243	24.798	Night
2015-07-04 02:15:00	2015-07-04 02:15:00	24.895	25.793	25.186	25.283	24.291	24.919	Night
2015-07-04 02:30:00	2015-07-04 02:30:00	24.919	25.695	25.113	25.234	24.339	25.016	Night
2015-07-04 02:45:00	2015-07-04 02:45:00	24.944	25.623	25.089	25.186	24.46	25.065	Night
2015-07-04 03:00:00	2015-07-04 03:00:00	24.992	25.55	25.089	25.137	24.702	25.089	Night
2015-07-04 03:15:00	2015-07-04 03:15:00	25.04	25.477	25.089	25.137	24.798	25.137	Night
2015-07-04 03:30:00	2015-07-04 03:30:00	25.089	25.404	25.113	25.137	24.895	25.186	Night
2015-07-04 03:45:00	2015-07-04 03:45:00	25.137	25.331	25.137	25.137	25.016	25.21	Night
2015-07-04 04:00:00	2015-07-04 04:00:00	25.186	25.258	25.186	25.162	25.113	25.258	Night
2015-07-04 04:15:00	2015-07-04 04:15:00	25.283	25.21	25.234	25.21	25.186	25.283	Night
2015-07-04 04:30:00	2015-07-04 04:30:00	25.38	25.186	25.307	25.258	25.234	25.331	Night
2015-07-04 04:45:00	2015-07-04 04:45:00	25.501	25.186	25.404	25.331	25.307	25.38	Night
2015-07-04 05:00:00	2015-07-04 05:00:00	25.574	25.186	25.501	25.404	25.355	25.428	Night
2015-07-04 05:15:00	2015-07-04 05:15:00	25.671	25.234	25.623	25.501	25.404	25.453	Night
2015-07-04 05:30:00	2015-07-04 05:30:00	25.768	25.258	25.768	25.623	25.453	25.477	Night
2015-07-04 05:45:00	2015-07-04 05:45:00	25.817	25.283	25.866	25.72	25.525	25.501	Night
2015-07-04 06:00:00	2015-07-04 06:00:00	25.89	25.307	25.914	25.817	25.574	25.525	Night
2015-07-04 06:15:00	2015-07-04 06:15:00	25.939	25.355	25.939	25.866	25.647	25.574	Night
2015-07-04 06:30:00	2015-07-04 06:30:00	25.963	25.38	25.939	25.89	25.671	25.647	Night
2015-07-04 06:45:00	2015-07-04 06:45:00	26.012	25.453	25.963	25.914	25.72	25.671	Night
2015-07-04 07:00:00	2015-07-04 07:00:00	26.036	25.501	25.963	25.939	25.768	25.72	Night
2015-07-04 07:15:00	2015-07-04 07:15:00	26.061	25.574	25.963	25.963	25.793	25.793	Night
2015-07-04 07:30:00	2015-07-04 07:30:00	26.061	25.623	25.987	25.963	25.841	25.841	Night
2015-07-04 07:45:00	2015-07-04 07:45:00	26.085	25.695	26.012	25.987	25.89	25.89	Night
2015-07-04 08:00:00	2015-07-04 08:00:00	26.109	25.744	26.061	26.036	25.914	25.914	Night
2015-07-04 08:15:00	2015-07-04 08:15:00	26.134	25.817	26.109	26.061	25.963	25.963	Night
2015-07-04 08:30:00	2015-07-04 08:30:00	26.158	25.89	26.158	26.109	25.987	26.012	Night
2015-07-04 08:45:00	2015-07-04 08:45:00	26.182	25.963	26.231	26.158	26.036	26.085	Night
2015-07-04 09:00:00	2015-07-04 09:00:00	26.231	26.036	26.28	26.207	26.061	26.182	Night
2015-07-04 09:15:00	2015-07-04 09:15:00	26.256	26.109	26.329	26.256	26.109	26.256	Night
2015-07-04 09:30:00	2015-07-04 09:30:00	26.304	26.182	26.378	26.304	26.158	26.329	Night
2015-07-04 09:45:00	2015-07-04 09:45:00	26.329	26.256	26.475	26.353	26.182	26.426	Night
2015-07-04 10:00:00	2015-07-04 10:00:00	26.378	26.353	26.573	26.451	25.987	26.5	Night
2015-07-04 10:15:00	2015-07-04 10:15:00	26.451	26.451	26.671	26.549	25.939	26.573	Night
2015-07-04 10:30:00	2015-07-04 10:30:00	26.5	26.549	26.769	26.646	26.012	26.622	Night
2015-07-04 10:45:00	2015-07-04 10:45:00	26.549	26.646	26.891	26.744	26.134	26.671	Night
2015-07-04 11:00:00	2015-07-04 11:00:00	26.622	26.769	27.014	26.867	26.207	26.72	Day
2015-07-04 11:15:00	2015-07-04 11:15:00	26.695	26.891	27.087	26.965	26.182	26.769	Day
2015-07-04 11:30:00	2015-07-04 11:30:00	26.744	27.014	27.186	27.038	26.085	26.842	Day
2015-07-04 11:45:00	2015-07-04 11:45:00	26.818	27.136	27.235	27.112	25.963	26.867	Day
2015-07-04 12:00:00	2015-07-04 12:00:00	26.867	27.235	27.235	27.161	25.939	26.916	Day
2015-07-04 12:15:00	2015-07-04 12:15:00	26.891	27.333	27.235	27.161	25.866	26.965	Day
2015-07-04 12:30:00	2015-07-04 12:30:00	26.916	27.456	27.235	27.186	25.939	26.989	Day
2015-07-04 12:45:00	2015-07-04 12:45:00	26.965	27.554	27.235	27.186	26.036	27.014	Day
2015-07-04 13:00:00	2015-07-04 13:00:00	26.989	27.677	27.284	27.21	26.109	27.038	Day
2015-07-04 13:15:00	2015-07-04 13:15:00	27.038	27.751	27.308	27.21	26.158	27.038	Day
2015-07-04 13:30:00	2015-07-04 13:30:00	27.087	27.85	27.333	27.235	26.231	27.063	Day
2015-07-04 13:45:00	2015-07-04 13:45:00	27.112	27.899	27.333	27.259	26.28	27.063	Day
2015-07-04 14:00:00	2015-07-04 14:00:00	27.136	27.949	27.333	27.284	26.329	27.038	Day
2015-07-04 14:15:00	2015-07-04 14:15:00	27.161	27.974	27.358	27.284	26.402	27.014	Night
2015-07-04 14:30:00	2015-07-04 14:30:00	27.186	27.998	27.358	27.308	26.475	26.989	Night
2015-07-04 14:45:00	2015-07-04 14:45:00	27.21	27.998	27.358	27.333	26.451	26.965	Night
2015-07-04 15:00:00	2015-07-04 15:00:00	27.235	28.023	27.382	27.333	26.378	26.94	Night
2015-07-04 15:15:00	2015-07-04 15:15:00	27.235	28.023	27.407	27.382	26.231	26.916	Night
2015-07-04 15:30:00	2015-07-04 15:30:00	27.284	27.998	27.456	27.431	25.987	26.916	Night
2015-07-04 15:45:00	2015-07-04 15:45:00	27.284	27.974	27.505	27.481	25.695	26.867	Night
2015-07-04 16:00:00	2015-07-04 16:00:00	27.333	27.974	27.53	27.505	25.574	26.793	Night
2015-07-04 16:15:00	2015-07-04 16:15:00	27.333	27.949	27.53	27.53	25.623	26.744	Night
2015-07-04 16:30:00	2015-07-04 16:30:00	27.358	27.924	27.53	27.53	25.695	26.695	Night
2015-07-04 16:45:00	2015-07-04 16:45:00	27.358	27.899	27.554	27.554	25.72	26.646	Night
2015-07-04 17:00:00	2015-07-04 17:00:00	27.382	27.875	27.554	27.554	25.793	26.598	Night
2015-07-04 17:15:00	2015-07-04 17:15:00	27.382	27.85	27.554	27.554	25.914	26.549	Night
2015-07-04 17:30:00	2015-07-04 17:30:00	27.382	27.85	27.554	27.579	25.987	26.5	Night
2015-07-04 17:45:00	2015-07-04 17:45:00	27.382	27.85	27.554	27.579	26.061	26.451	Night
2015-07-04 18:00:00	2015-07-04 18:00:00	27.382	27.85	27.554	27.579	26.109	26.451	Night
2015-07-04 18:15:00	2015-07-04 18:15:00	27.407	27.85	27.554	27.554	26.182	26.451	Night
2015-07-04 18:30:00	2015-07-04 18:30:00	27.431	27.85	27.53	27.554	26.231	26.475	Night
2015-07-04 18:45:00	2015-07-04 18:45:00	27.431	27.825	27.505	27.53	26.28	26.475	Night
2015-07-04 19:00:00	2015-07-04 19:00:00	27.407	27.801	27.481	27.505	26.304	26.5	Night
2015-07-04 19:15:00	2015-07-04 19:15:00	27.382	27.776	27.431	27.481	26.353	26.5	Night
2015-07-04 19:30:00	2015-07-04 19:30:00	27.333	27.727	27.407	27.431	26.353	26.5	Night
2015-07-04 19:45:00	2015-07-04 19:45:00	27.284	27.677	27.333	27.382	26.378	26.5	Night
2015-07-04 20:00:00	2015-07-04 20:00:00	27.235	27.628	27.259	27.333	26.402	26.5	Night
2015-07-04 20:15:00	2015-07-04 20:15:00	27.186	27.554	27.186	27.235	26.402	26.5	Night
2015-07-04 20:30:00	2015-07-04 20:30:00	27.136	27.505	27.112	27.161	26.402	26.524	Night
2015-07-04 20:45:00	2015-07-04 20:45:00	27.087	27.456	27.038	27.112	26.426	26.549	Night
2015-07-04 21:00:00	2015-07-04 21:00:00	27.038	27.382	26.965	27.038	26.402	26.573	Night
2015-07-04 21:15:00	2015-07-04 21:15:00	27.014	27.333	26.916	26.965	25.283	26.598	Night
2015-07-04 21:30:00	2015-07-04 21:30:00	26.965	27.284	26.867	26.916	24.629	26.598	Night
2015-07-04 21:45:00	2015-07-04 21:45:00	26.94	27.235	26.818	26.867	24.219	26.598	Night
2015-07-04 22:00:00	2015-07-04 22:00:00	26.94	27.161	26.793	26.842	24.026	26.231	Night
2015-07-04 22:15:00	2015-07-04 22:15:00	26.916	27.112	26.769	26.818	23.905	25.598	Night
2015-07-04 22:30:00	2015-07-04 22:30:00	26.916	27.038	26.769	26.818	23.761	25.089	Night
2015-07-04 22:45:00	2015-07-04 22:45:00	26.916	26.989	26.793	26.818	23.641	24.726	Night
2015-07-04 23:00:00	2015-07-04 23:00:00	26.916	26.94	26.818	26.818	23.569	24.46	Night
2015-07-04 23:15:00	2015-07-04 23:15:00	26.891	26.867	26.818	26.842	23.545	24.339	Night
2015-07-04 23:30:00	2015-07-04 23:30:00	26.867	26.842	26.842	26.842	23.569	24.363	Night
2015-07-04 23:45:00	2015-07-04 23:45:00	26.818	26.793	26.842	26.842	23.665	24.436	Night
2015-07-05	2015-07-05	26.72	26.769	26.793	26.818	23.785	24.532	Night
2015-07-05 00:15:00	2015-07-05 00:15:00	26.622	26.72	26.744	26.769	23.978	24.629	Night
2015-07-05 00:30:00	2015-07-05 00:30:00	26.549	26.695	26.646	26.695	24.146	24.774	Night
2015-07-05 00:45:00	2015-07-05 00:45:00	26.475	26.671	26.573	26.622	24.267	24.992	Night
2015-07-05 01:00:00	2015-07-05 01:00:00	26.426	26.646	26.5	26.549	24.388	25.162	Night
2015-07-05 01:15:00	2015-07-05 01:15:00	26.353	26.598	26.451	26.5	24.508	25.283	Night
2015-07-05 01:30:00	2015-07-05 01:30:00	26.304	26.573	26.378	26.451	24.508	25.355	Night
2015-07-05 01:45:00	2015-07-05 01:45:00	26.28	26.549	26.329	26.402	24.605	25.38	Night
2015-07-05 02:00:00	2015-07-05 02:00:00	26.231	26.5	26.256	26.329	24.702	25.428	Night
2015-07-05 02:15:00	2015-07-05 02:15:00	26.158	26.451	26.182	26.256	24.798	25.501	Night
2015-07-05 02:30:00	2015-07-05 02:30:00	26.085	26.378	26.109	26.182	24.871	25.525	Night
2015-07-05 02:45:00	2015-07-05 02:45:00	26.012	26.329	26.036	26.109	24.968	25.55	Night
2015-07-05 03:00:00	2015-07-05 03:00:00	25.939	26.28	25.963	26.036	25.04	25.574	Night
2015-07-05 03:15:00	2015-07-05 03:15:00	25.866	26.207	25.89	25.963	25.065	25.623	Night
2015-07-05 03:30:00	2015-07-05 03:30:00	25.817	26.134	25.817	25.914	25.089	25.695	Night
2015-07-05 03:45:00	2015-07-05 03:45:00	25.768	26.061	25.768	25.866	25.137	25.744	Night
2015-07-05 04:00:00	2015-07-05 04:00:00	25.744	25.987	25.744	25.817	25.21	25.768	Night
2015-07-05 04:15:00	2015-07-05 04:15:00	25.72	25.914	25.72	25.768	25.258	25.817	Night
2015-07-05 04:30:00	2015-07-05 04:30:00	25.695	25.866	25.695	25.744	25.283	25.817	Night
2015-07-05 04:45:00	2015-07-05 04:45:00	25.695	25.817	25.671	25.72	25.331	25.841	Night
2015-07-05 05:00:00	2015-07-05 05:00:00	25.671	25.768	25.671	25.695	25.38	25.866	Night
2015-07-05 05:15:00	2015-07-05 05:15:00	25.695	25.744	25.671	25.695	25.428	25.89	Night
2015-07-05 05:30:00	2015-07-05 05:30:00	25.744	25.72	25.671	25.695	25.477	25.939	Night
2015-07-05 05:45:00	2015-07-05 05:45:00	25.793	25.695	25.671	25.695	25.574	25.987	Night
2015-07-05 06:00:00	2015-07-05 06:00:00	25.841	25.72	25.695	25.72	25.623	26.012	Night
2015-07-05 06:15:00	2015-07-05 06:15:00	25.89	25.72	25.72	25.72	25.671	26.061	Night
2015-07-05 06:30:00	2015-07-05 06:30:00	25.939	25.72	25.768	25.768	25.744	26.085	Night
2015-07-05 06:45:00	2015-07-05 06:45:00	25.963	25.72	25.793	25.768	25.768	26.085	Night
2015-07-05 07:00:00	2015-07-05 07:00:00	25.987	25.72	25.817	25.817	25.817	26.085	Night
2015-07-05 07:15:00	2015-07-05 07:15:00	26.012	25.744	25.841	25.817	25.841	26.085	Night
2015-07-05 07:30:00	2015-07-05 07:30:00	26.012	25.768	25.866	25.866	25.866	26.061	Night
2015-07-05 07:45:00	2015-07-05 07:45:00	26.036	25.793	25.914	25.89	25.914	26.036	Night
2015-07-05 08:00:00	2015-07-05 08:00:00	26.085	25.817	25.963	25.939	25.939	26.036	Night
2015-07-05 08:15:00	2015-07-05 08:15:00	26.109	25.866	26.012	25.963	25.987	26.061	Night
2015-07-05 08:30:00	2015-07-05 08:30:00	26.158	25.89	26.085	26.012	26.036	26.109	Night
2015-07-05 08:45:00	2015-07-05 08:45:00	26.182	25.963	26.158	26.061	26.061	26.158	Night
2015-07-05 09:00:00	2015-07-05 09:00:00	26.231	26.012	26.207	26.134	26.109	26.207	Night
2015-07-05 09:15:00	2015-07-05 09:15:00	26.28	26.085	26.28	26.207	26.158	26.256	Night
2015-07-05 09:30:00	2015-07-05 09:30:00	26.353	26.158	26.378	26.256	26.207	26.329	Night
2015-07-05 09:45:00	2015-07-05 09:45:00	26.402	26.256	26.451	26.353	26.231	26.378	Night
2015-07-05 10:00:00	2015-07-05 10:00:00	26.451	26.353	26.524	26.426	26.28	26.451	Night
2015-07-05 10:15:00	2015-07-05 10:15:00	26.5	26.426	26.598	26.5	26.329	26.5	Night
2015-07-05 10:30:00	2015-07-05 10:30:00	26.549	26.524	26.671	26.573	26.378	26.549	Night
2015-07-05 10:45:00	2015-07-05 10:45:00	26.573	26.622	26.793	26.695	26.182	26.573	Night
2015-07-05 11:00:00	2015-07-05 11:00:00	26.646	26.72	26.891	26.793	25.72	26.622	Day
2015-07-05 11:15:00	2015-07-05 11:15:00	26.695	26.818	26.989	26.867	25.453	26.671	Day
2015-07-05 11:30:00	2015-07-05 11:30:00	26.744	26.94	27.038	26.94	25.331	26.695	Day
2015-07-05 11:45:00	2015-07-05 11:45:00	26.818	27.014	27.112	27.014	25.331	26.744	Day
2015-07-05 12:00:00	2015-07-05 12:00:00	26.867	27.112	27.161	27.063	25.355	26.769	Day
2015-07-05 12:15:00	2015-07-05 12:15:00	26.916	27.21	27.186	27.112	25.428	26.793	Day
2015-07-05 12:30:00	2015-07-05 12:30:00	26.965	27.284	27.21	27.136	25.574	26.818	Day
2015-07-05 12:45:00	2015-07-05 12:45:00	27.014	27.358	27.259	27.161	25.574	26.842	Day
2015-07-05 13:00:00	2015-07-05 13:00:00	27.063	27.431	27.284	27.186	25.623	26.867	Day
2015-07-05 13:15:00	2015-07-05 13:15:00	27.087	27.505	27.284	27.21	25.72	26.891	Day
2015-07-05 13:30:00	2015-07-05 13:30:00	27.112	27.554	27.284	27.235	25.841	26.916	Day
2015-07-05 13:45:00	2015-07-05 13:45:00	27.112	27.579	27.259	27.235	26.012	26.94	Day
2015-07-05 14:00:00	2015-07-05 14:00:00	27.136	27.628	27.235	27.21	26.158	26.965	Day
2015-07-05 14:15:00	2015-07-05 14:15:00	27.136	27.653	27.235	27.21	26.256	26.965	Night
2015-07-05 14:30:00	2015-07-05 14:30:00	27.161	27.653	27.235	27.21	26.329	26.965	Night
2015-07-05 14:45:00	2015-07-05 14:45:00	27.161	27.628	27.235	27.21	26.353	26.94	Night
2015-07-05 15:00:00	2015-07-05 15:00:00	27.186	27.604	27.21	27.21	26.28	26.916	Night
2015-07-05 15:15:00	2015-07-05 15:15:00	27.21	27.579	27.235	27.21	26.231	26.891	Night
2015-07-05 15:30:00	2015-07-05 15:30:00	27.235	27.554	27.235	27.21	26.207	26.842	Night
2015-07-05 15:45:00	2015-07-05 15:45:00	27.235	27.53	27.235	27.235	26.231	26.842	Night
2015-07-05 16:00:00	2015-07-05 16:00:00	27.235	27.505	27.259	27.235	26.28	26.818	Night
2015-07-05 16:15:00	2015-07-05 16:15:00	27.259	27.481	27.284	27.259	26.329	26.793	Night
2015-07-05 16:30:00	2015-07-05 16:30:00	27.259	27.481	27.284	27.284	26.353	26.793	Night
2015-07-05 16:45:00	2015-07-05 16:45:00	27.259	27.481	27.333	27.308	26.402	26.793	Night
2015-07-05 17:00:00	2015-07-05 17:00:00	27.259	27.505	27.333	27.333	26.451	26.769	Night
2015-07-05 17:15:00	2015-07-05 17:15:00	27.259	27.53	27.358	27.358	26.5	26.769	Night
2015-07-05 17:30:00	2015-07-05 17:30:00	27.259	27.53	27.358	27.358	26.524	26.744	Night
2015-07-05 17:45:00	2015-07-05 17:45:00	27.259	27.554	27.382	27.382	26.573	26.744	Night
2015-07-05 18:00:00	2015-07-05 18:00:00	27.259	27.579	27.382	27.382	26.573	26.744	Night
2015-07-05 18:15:00	2015-07-05 18:15:00	27.259	27.579	27.358	27.358	26.451	26.744	Night
2015-07-05 18:30:00	2015-07-05 18:30:00	27.235	27.554	27.333	27.333	25.914	26.769	Night
2015-07-05 18:45:00	2015-07-05 18:45:00	27.21	27.53	27.308	27.333	25.647	26.744	Night
2015-07-05 19:00:00	2015-07-05 19:00:00	27.186	27.505	27.259	27.284	25.501	26.695	Night
2015-07-05 19:15:00	2015-07-05 19:15:00	27.161	27.456	27.235	27.259	25.477	26.5	Night
2015-07-05 19:30:00	2015-07-05 19:30:00	27.136	27.431	27.186	27.21	25.453	26.304	Night
2015-07-05 19:45:00	2015-07-05 19:45:00	27.112	27.382	27.136	27.186	25.453	26.182	Night
2015-07-05 20:00:00	2015-07-05 20:00:00	27.087	27.333	27.112	27.136	25.501	26.109	Night
2015-07-05 20:15:00	2015-07-05 20:15:00	27.063	27.284	27.087	27.112	25.525	26.036	Night
2015-07-05 20:30:00	2015-07-05 20:30:00	27.038	27.235	27.087	27.087	25.574	26.012	Night
2015-07-05 20:45:00	2015-07-05 20:45:00	27.014	27.161	27.063	27.087	25.623	26.061	Night
2015-07-05 21:00:00	2015-07-05 21:00:00	26.989	27.087	27.038	27.063	25.695	26.158	Night
2015-07-05 21:15:00	2015-07-05 21:15:00	26.965	27.038	27.014	27.038	25.744	26.256	Night
2015-07-05 21:30:00	2015-07-05 21:30:00	26.916	26.989	26.989	27.038	25.817	26.329	Night
2015-07-05 21:45:00	2015-07-05 21:45:00	26.867	26.94	26.94	26.989	25.866	26.378	Night
2015-07-05 22:00:00	2015-07-05 22:00:00	26.793	26.916	26.891	26.94	25.914	26.426	Night
2015-07-05 22:15:00	2015-07-05 22:15:00	26.744	26.891	26.818	26.867	25.963	26.426	Night
2015-07-05 22:30:00	2015-07-05 22:30:00	26.695	26.842	26.744	26.818	25.987	26.426	Night
2015-07-05 22:45:00	2015-07-05 22:45:00	26.646	26.793	26.695	26.769	24.992	26.451	Night
2015-07-05 23:00:00	2015-07-05 23:00:00	26.598	26.769	26.671	26.744	24.219	26.475	Night
2015-07-05 23:15:00	2015-07-05 23:15:00	26.598	26.744	26.646	26.695	24.002	26.451	Night
2015-07-05 23:30:00	2015-07-05 23:30:00	26.573	26.695	26.646	26.695	23.833	26.28	Night
2015-07-05 23:45:00	2015-07-05 23:45:00	26.549	26.671	26.622	26.646	23.665	25.914	Night
2015-07-06	2015-07-06	26.549	26.646	26.573	26.622	23.593	25.574	Night
2015-07-06 00:15:00	2015-07-06 00:15:00	26.549	26.622	26.549	26.598	23.641	25.38	Night
2015-07-06 00:30:00	2015-07-06 00:30:00	26.524	26.573	26.524	26.573	23.737	25.331	Night
2015-07-06 00:45:00	2015-07-06 00:45:00	26.5	26.549	26.5	26.549	23.978	25.355	Night
2015-07-06 01:00:00	2015-07-06 01:00:00	26.475	26.524	26.475	26.524	24.267	25.428	Night
2015-07-06 01:15:00	2015-07-06 01:15:00	26.451	26.5	26.451	26.5	24.339	25.55	Night
2015-07-06 01:30:00	2015-07-06 01:30:00	26.426	26.451	26.426	26.451	24.46	25.647	Night
2015-07-06 01:45:00	2015-07-06 01:45:00	26.402	26.426	26.378	26.426	24.653	25.72	Night
2015-07-06 02:00:00	2015-07-06 02:00:00	26.378	26.402	26.353	26.402	24.847	25.768	Night
2015-07-06 02:15:00	2015-07-06 02:15:00	26.353	26.378	26.304	26.353	25.016	25.793	Night
2015-07-06 02:30:00	2015-07-06 02:30:00	26.304	26.353	26.28	26.329	25.113	25.793	Night
2015-07-06 02:45:00	2015-07-06 02:45:00	26.28	26.304	26.231	26.28	25.186	25.768	Night
2015-07-06 03:00:00	2015-07-06 03:00:00	26.256	26.28	26.207	26.256	25.234	25.744	Night
2015-07-06 03:15:00	2015-07-06 03:15:00	26.231	26.256	26.158	26.207	25.258	25.744	Night
2015-07-06 03:30:00	2015-07-06 03:30:00	26.182	26.231	26.109	26.182	25.234	25.768	Night
2015-07-06 03:45:00	2015-07-06 03:45:00	26.158	26.182	26.085	26.158	25.307	25.768	Night
2015-07-06 04:00:00	2015-07-06 04:00:00	26.109	26.158	26.061	26.109	25.404	25.793	Night
2015-07-06 04:15:00	2015-07-06 04:15:00	26.085	26.109	26.012	26.061	25.501	25.841	Night
2015-07-06 04:30:00	2015-07-06 04:30:00	26.036	26.061	25.987	26.036	25.525	25.866	Night
2015-07-06 04:45:00	2015-07-06 04:45:00	25.987	26.012	25.939	25.987	25.55	25.89	Night
2015-07-06 05:00:00	2015-07-06 05:00:00	25.939	25.963	25.914	25.963	25.574	25.914	Night
2015-07-06 05:15:00	2015-07-06 05:15:00	25.89	25.939	25.866	25.939	25.574	25.914	Night
2015-07-06 05:30:00	2015-07-06 05:30:00	25.866	25.89	25.866	25.914	25.598	25.939	Night
2015-07-06 05:45:00	2015-07-06 05:45:00	25.866	25.866	25.841	25.89	25.623	25.939	Night
2015-07-06 06:00:00	2015-07-06 06:00:00	25.866	25.866	25.841	25.866	25.647	25.939	Night
2015-07-06 06:15:00	2015-07-06 06:15:00	25.866	25.841	25.841	25.866	25.671	25.939	Night
2015-07-06 06:30:00	2015-07-06 06:30:00	25.866	25.817	25.866	25.866	25.695	25.939	Night
2015-07-06 06:45:00	2015-07-06 06:45:00	25.841	25.817	25.866	25.89	25.72	25.939	Night
2015-07-06 07:00:00	2015-07-06 07:00:00	25.841	25.817	25.866	25.89	25.744	25.939	Night
2015-07-06 07:15:00	2015-07-06 07:15:00	25.841	25.817	25.89	25.89	25.768	25.963	Night
2015-07-06 07:30:00	2015-07-06 07:30:00	25.841	25.817	25.89	25.89	25.793	25.963	Night
2015-07-06 07:45:00	2015-07-06 07:45:00	25.841	25.841	25.914	25.914	25.841	25.914	Night
2015-07-06 08:00:00	2015-07-06 08:00:00	25.841	25.866	25.914	25.914	25.866	25.866	Night
2015-07-06 08:15:00	2015-07-06 08:15:00	25.841	25.866	25.963	25.939	25.866	25.89	Night
2015-07-06 08:30:00	2015-07-06 08:30:00	25.866	25.914	25.987	25.963	25.89	25.914	Night
2015-07-06 08:45:00	2015-07-06 08:45:00	25.866	25.939	26.012	25.987	25.914	25.939	Night
2015-07-06 09:00:00	2015-07-06 09:00:00	25.89	25.987	26.061	26.012	25.963	25.987	Night
2015-07-06 09:15:00	2015-07-06 09:15:00	25.914	26.061	26.109	26.061	25.987	26.085	Night
2015-07-06 09:30:00	2015-07-06 09:30:00	25.939	26.109	26.158	26.085	26.012	26.158	Night
2015-07-06 09:45:00	2015-07-06 09:45:00	25.963	26.182	26.207	26.134	26.036	26.207	Night
2015-07-06 10:00:00	2015-07-06 10:00:00	25.987	26.231	26.256	26.207	26.061	26.28	Night
2015-07-06 10:15:00	2015-07-06 10:15:00	26.036	26.304	26.304	26.256	26.085	26.329	Night
2015-07-06 10:30:00	2015-07-06 10:30:00	26.061	26.378	26.378	26.304	26.134	26.378	Night
2015-07-06 10:45:00	2015-07-06 10:45:00	26.085	26.451	26.426	26.378	26.182	26.451	Night
2015-07-06 11:00:00	2015-07-06 11:00:00	26.134	26.524	26.475	26.426	26.231	26.475	Day
2015-07-06 11:15:00	2015-07-06 11:15:00	26.158	26.598	26.524	26.475	26.28	26.524	Day
2015-07-06 11:30:00	2015-07-06 11:30:00	26.207	26.671	26.573	26.524	26.329	26.549	Day
2015-07-06 11:45:00	2015-07-06 11:45:00	26.28	26.744	26.646	26.573	26.353	26.573	Day
2015-07-06 12:00:00	2015-07-06 12:00:00	26.353	26.842	26.695	26.646	25.768	26.598	Day
2015-07-06 12:15:00	2015-07-06 12:15:00	26.426	26.916	26.744	26.671	25.477	26.646	Day
2015-07-06 12:30:00	2015-07-06 12:30:00	26.475	26.965	26.744	26.695	25.307	26.646	Day
2015-07-06 12:45:00	2015-07-06 12:45:00	26.524	27.038	26.769	26.72	25.258	26.695	Day
2015-07-06 13:00:00	2015-07-06 13:00:00	26.573	27.087	26.793	26.744	25.307	26.72	Day
2015-07-06 13:15:00	2015-07-06 13:15:00	26.622	27.112	26.818	26.769	25.38	26.769	Day
2015-07-06 13:30:00	2015-07-06 13:30:00	26.671	27.136	26.842	26.793	25.453	26.818	Day
2015-07-06 13:45:00	2015-07-06 13:45:00	26.695	27.186	26.842	26.793	25.55	26.842	Day
2015-07-06 14:00:00	2015-07-06 14:00:00	26.744	27.186	26.867	26.818	25.768	26.842	Day
2015-07-06 14:15:00	2015-07-06 14:15:00	26.793	27.21	26.867	26.842	25.817	26.842	Night
2015-07-06 14:30:00	2015-07-06 14:30:00	26.818	27.235	26.891	26.842	25.817	26.818	Night
2015-07-06 14:45:00	2015-07-06 14:45:00	26.867	27.235	26.916	26.867	25.914	26.793	Night
2015-07-06 15:00:00	2015-07-06 15:00:00	26.891	27.235	26.916	26.891	25.987	26.793	Night
2015-07-06 15:15:00	2015-07-06 15:15:00	26.916	27.235	26.94	26.891	26.085	26.793	Night
2015-07-06 15:30:00	2015-07-06 15:30:00	26.94	27.235	26.94	26.916	26.158	26.793	Night
2015-07-06 15:45:00	2015-07-06 15:45:00	26.965	27.21	26.94	26.94	26.182	26.793	Night
2015-07-06 16:00:00	2015-07-06 16:00:00	26.989	27.21	26.94	26.94	26.207	26.793	Night
2015-07-06 16:15:00	2015-07-06 16:15:00	26.989	27.186	26.94	26.94	26.231	26.769	Night
2015-07-06 16:30:00	2015-07-06 16:30:00	26.989	27.186	26.94	26.94	26.28	26.769	Night
2015-07-06 16:45:00	2015-07-06 16:45:00	26.989	27.161	26.94	26.94	26.304	26.769	Night
2015-07-06 17:00:00	2015-07-06 17:00:00	26.989	27.161	26.94	26.94	26.304	26.744	Night
2015-07-06 17:15:00	2015-07-06 17:15:00	26.965	27.161	26.965	26.965	26.304	26.72	Night
2015-07-06 17:30:00	2015-07-06 17:30:00	26.965	27.161	26.965	26.965	26.304	26.695	Night
2015-07-06 17:45:00	2015-07-06 17:45:00	26.965	27.161	26.989	26.989	26.304	26.695	Night
2015-07-06 18:00:00	2015-07-06 18:00:00	26.94	27.161	26.989	26.989	26.304	26.695	Night
2015-07-06 18:15:00	2015-07-06 18:15:00	26.94	27.136	26.989	26.989	26.304	26.646	Night
2015-07-06 18:30:00	2015-07-06 18:30:00	26.916	27.136	26.965	26.989	26.304	26.622	Night
2015-07-06 18:45:00	2015-07-06 18:45:00	26.891	27.087	26.94	26.965	26.304	26.598	Night
2015-07-06 19:00:00	2015-07-06 19:00:00	26.867	27.063	26.916	26.94	26.329	26.598	Night
2015-07-06 19:15:00	2015-07-06 19:15:00	26.842	27.038	26.891	26.916	26.353	26.573	Night
2015-07-06 19:30:00	2015-07-06 19:30:00	26.842	26.989	26.867	26.891	26.353	26.573	Night
2015-07-06 19:45:00	2015-07-06 19:45:00	26.818	26.94	26.842	26.891	26.378	26.573	Night
2015-07-06 20:00:00	2015-07-06 20:00:00	26.793	26.916	26.842	26.867	26.402	26.573	Night
2015-07-06 20:15:00	2015-07-06 20:15:00	26.769	26.867	26.793	26.842	26.158	26.598	Night
2015-07-06 20:30:00	2015-07-06 20:30:00	26.744	26.842	26.793	26.818	25.914	26.598	Night
2015-07-06 20:45:00	2015-07-06 20:45:00	26.72	26.818	26.769	26.793	25.817	26.598	Night
2015-07-06 21:00:00	2015-07-06 21:00:00	26.695	26.769	26.744	26.769	25.793	26.598	Night
2015-07-06 21:15:00	2015-07-06 21:15:00	26.671	26.744	26.695	26.744	25.793	26.598	Night
2015-07-06 21:30:00	2015-07-06 21:30:00	26.646	26.72	26.671	26.72	25.817	26.573	Night
2015-07-06 21:45:00	2015-07-06 21:45:00	26.622	26.695	26.671	26.695	25.866	26.549	Night
2015-07-06 22:00:00	2015-07-06 22:00:00	26.598	26.671	26.646	26.695	25.914	26.549	Night
2015-07-06 22:15:00	2015-07-06 22:15:00	26.573	26.646	26.646	26.671	26.012	26.524	Night
2015-07-06 22:30:00	2015-07-06 22:30:00	26.549	26.622	26.622	26.646	26.109	26.524	Night
2015-07-06 22:45:00	2015-07-06 22:45:00	26.549	26.573	26.598	26.622	26.207	26.5	Night
2015-07-06 23:00:00	2015-07-06 23:00:00	26.524	26.549	26.573	26.598	26.256	26.5	Night
2015-07-06 23:15:00	2015-07-06 23:15:00	26.5	26.524	26.549	26.573	26.28	26.475	Night
2015-07-06 23:30:00	2015-07-06 23:30:00	26.475	26.5	26.5	26.549	26.28	26.475	Night
2015-07-06 23:45:00	2015-07-06 23:45:00	26.451	26.451	26.475	26.524	26.304	26.451	Night
2015-07-07	2015-07-07	26.402	26.426	26.451	26.5	26.304	26.451	Night
2015-07-07 00:15:00	2015-07-07 00:15:00	26.378	26.402	26.426	26.475	26.304	26.426	Night
2015-07-07 00:30:00	2015-07-07 00:30:00	26.353	26.353	26.402	26.451	26.304	26.402	Night
2015-07-07 00:45:00	2015-07-07 00:45:00	26.353	26.353	26.378	26.426	26.304	26.402	Night
2015-07-07 01:00:00	2015-07-07 01:00:00	26.329	26.304	26.353	26.402	26.304	26.378	Night
2015-07-07 01:15:00	2015-07-07 01:15:00	26.304	26.28	26.329	26.378	26.304	26.353	Night
2015-07-07 01:30:00	2015-07-07 01:30:00	26.304	26.256	26.304	26.353	26.304	26.329	Night
2015-07-07 01:45:00	2015-07-07 01:45:00	26.28	26.256	26.304	26.329	26.304	26.304	Night
2015-07-07 02:00:00	2015-07-07 02:00:00	26.28	26.231	26.28	26.304	26.304	26.304	Night
2015-07-07 02:15:00	2015-07-07 02:15:00	26.28	26.207	26.256	26.28	26.304	26.28	Night
2015-07-07 02:30:00	2015-07-07 02:30:00	26.256	26.182	26.231	26.256	26.304	26.256	Night
2015-07-07 02:45:00	2015-07-07 02:45:00	26.256	26.158	26.207	26.231	26.304	26.256	Night
2015-07-07 03:00:00	2015-07-07 03:00:00	26.256	26.158	26.182	26.231	26.28	26.256	Night
2015-07-07 03:15:00	2015-07-07 03:15:00	26.231	26.134	26.182	26.207	26.256	26.231	Night
2015-07-07 03:30:00	2015-07-07 03:30:00	26.231	26.134	26.182	26.207	26.231	26.207	Night
2015-07-07 03:45:00	2015-07-07 03:45:00	26.207	26.109	26.158	26.182	26.207	26.182	Night
2015-07-07 04:00:00	2015-07-07 04:00:00	26.207	26.109	26.158	26.182	26.207	26.182	Night
2015-07-07 04:15:00	2015-07-07 04:15:00	26.207	26.109	26.158	26.182	26.182	26.158	Night
2015-07-07 04:30:00	2015-07-07 04:30:00	26.182	26.085	26.158	26.182	26.158	26.158	Night
2015-07-07 04:45:00	2015-07-07 04:45:00	26.182	26.085	26.158	26.158	26.109	26.158	Night
2015-07-07 05:00:00	2015-07-07 05:00:00	26.158	26.085	26.158	26.158	26.109	26.158	Night
2015-07-07 05:15:00	2015-07-07 05:15:00	26.158	26.085	26.158	26.158	26.109	26.134	Night
2015-07-07 05:30:00	2015-07-07 05:30:00	26.134	26.085	26.134	26.158	26.085	26.134	Night
2015-07-07 05:45:00	2015-07-07 05:45:00	26.134	26.085	26.134	26.158	26.061	26.109	Night
2015-07-07 06:00:00	2015-07-07 06:00:00	26.109	26.085	26.134	26.158	26.061	26.109	Night
2015-07-07 06:15:00	2015-07-07 06:15:00	26.109	26.085	26.134	26.158	26.061	26.085	Night
2015-07-07 06:30:00	2015-07-07 06:30:00	26.109	26.085	26.109	26.134	26.061	26.085	Night
2015-07-07 06:45:00	2015-07-07 06:45:00	26.109	26.085	26.109	26.134	26.061	26.061	Night
2015-07-07 07:00:00	2015-07-07 07:00:00	26.085	26.085	26.085	26.109	26.061	26.061	Night
2015-07-07 07:15:00	2015-07-07 07:15:00	26.085	26.109	26.085	26.109	26.061	26.061	Night
2015-07-07 07:30:00	2015-07-07 07:30:00	26.085	26.109	26.085	26.109	26.061	26.061	Night
2015-07-07 07:45:00	2015-07-07 07:45:00	26.085	26.109	26.109	26.109	26.061	26.036	Night
2015-07-07 08:00:00	2015-07-07 08:00:00	26.085	26.134	26.134	26.109	26.061	26.036	Night
2015-07-07 08:15:00	2015-07-07 08:15:00	26.085	26.158	26.158	26.134	26.061	26.061	Night
2015-07-07 08:30:00	2015-07-07 08:30:00	26.109	26.182	26.182	26.158	26.012	26.061	Night
2015-07-07 08:45:00	2015-07-07 08:45:00	26.109	26.207	26.207	26.182	26.036	26.061	Night
2015-07-07 09:00:00	2015-07-07 09:00:00	26.134	26.256	26.256	26.207	26.061	26.085	Night
2015-07-07 09:15:00	2015-07-07 09:15:00	26.158	26.28	26.28	26.231	26.085	26.109	Night
2015-07-07 09:30:00	2015-07-07 09:30:00	26.158	26.329	26.304	26.256	26.134	26.134	Night
2015-07-07 09:45:00	2015-07-07 09:45:00	26.182	26.353	26.353	26.304	26.158	26.207	Night
2015-07-07 10:00:00	2015-07-07 10:00:00	26.207	26.402	26.402	26.353	26.207	26.256	Night
2015-07-07 10:15:00	2015-07-07 10:15:00	26.231	26.451	26.426	26.378	26.231	26.304	Night
2015-07-07 10:30:00	2015-07-07 10:30:00	26.256	26.5	26.475	26.426	26.256	26.353	Night
2015-07-07 10:45:00	2015-07-07 10:45:00	26.304	26.549	26.549	26.475	26.28	26.402	Night
2015-07-07 11:00:00	2015-07-07 11:00:00	26.329	26.598	26.549	26.524	26.304	26.426	Day
2015-07-07 11:15:00	2015-07-07 11:15:00	26.378	26.671	26.573	26.549	26.329	26.451	Day
2015-07-07 11:30:00	2015-07-07 11:30:00	26.402	26.695	26.598	26.573	26.353	26.5	Day
2015-07-07 11:45:00	2015-07-07 11:45:00	26.451	26.744	26.598	26.573	25.744	26.549	Day
2015-07-07 12:00:00	2015-07-07 12:00:00	26.5	26.793	26.646	26.598	25.355	26.622	Day
2015-07-07 12:15:00	2015-07-07 12:15:00	26.573	26.842	26.671	26.622	25.234	26.695	Day
2015-07-07 12:30:00	2015-07-07 12:30:00	26.646	26.916	26.72	26.671	25.186	26.769	Day
2015-07-07 12:45:00	2015-07-07 12:45:00	26.695	26.965	26.769	26.695	25.162	26.818	Day
2015-07-07 13:00:00	2015-07-07 13:00:00	26.769	26.989	26.818	26.744	25.234	26.842	Day
2015-07-07 13:15:00	2015-07-07 13:15:00	26.818	27.038	26.818	26.769	25.38	26.867	Day
2015-07-07 13:30:00	2015-07-07 13:30:00	26.867	27.063	26.842	26.769	25.404	26.891	Day
2015-07-07 13:45:00	2015-07-07 13:45:00	26.891	27.087	26.842	26.793	25.525	26.94	Day
2015-07-07 14:00:00	2015-07-07 14:00:00	26.965	27.112	26.891	26.818	25.55	26.94	Day
2015-07-07 14:15:00	2015-07-07 14:15:00	26.989	27.136	26.916	26.842	25.695	26.965	Night
2015-07-07 14:30:00	2015-07-07 14:30:00	27.038	27.161	26.94	26.891	25.841	26.965	Night
2015-07-07 14:45:00	2015-07-07 14:45:00	27.063	27.161	26.965	26.916	25.866	26.94	Night
2015-07-07 15:00:00	2015-07-07 15:00:00	27.087	27.161	26.989	26.94	25.841	26.94	Night
2015-07-07 15:15:00	2015-07-07 15:15:00	27.112	27.161	26.989	26.94	25.841	26.916	Night
2015-07-07 15:30:00	2015-07-07 15:30:00	27.136	27.161	26.989	26.965	25.866	26.867	Night
2015-07-07 15:45:00	2015-07-07 15:45:00	27.112	27.161	26.989	26.965	25.866	26.818	Night
2015-07-07 16:00:00	2015-07-07 16:00:00	27.112	27.161	26.989	26.989	25.866	26.72	Night
2015-07-07 16:15:00	2015-07-07 16:15:00	27.087	27.136	26.989	26.989	25.914	26.671	Night
2015-07-07 16:30:00	2015-07-07 16:30:00	27.063	27.136	26.965	26.965	26.012	26.646	Night
2015-07-07 16:45:00	2015-07-07 16:45:00	27.038	27.136	26.965	26.965	26.085	26.598	Night
2015-07-07 17:00:00	2015-07-07 17:00:00	27.038	27.112	26.965	26.965	26.134	26.573	Night
2015-07-07 17:15:00	2015-07-07 17:15:00	27.014	27.112	26.94	26.965	26.182	26.573	Night
2015-07-07 17:30:00	2015-07-07 17:30:00	26.989	27.112	26.94	26.965	26.207	26.622	Night
2015-07-07 17:45:00	2015-07-07 17:45:00	26.965	27.087	26.94	26.965	26.231	26.646	Night
2015-07-07 18:00:00	2015-07-07 18:00:00	26.965	27.087	26.94	26.965	26.256	26.646	Night
2015-07-07 18:15:00	2015-07-07 18:15:00	26.94	27.038	26.916	26.94	26.256	26.646	Night
2015-07-07 18:30:00	2015-07-07 18:30:00	26.891	27.014	26.891	26.916	26.231	26.646	Night
2015-07-07 18:45:00	2015-07-07 18:45:00	26.867	26.989	26.867	26.891	26.207	26.622	Night
2015-07-07 19:00:00	2015-07-07 19:00:00	26.842	26.94	26.842	26.867	26.207	26.598	Night
2015-07-07 19:15:00	2015-07-07 19:15:00	26.793	26.916	26.818	26.842	26.207	26.573	Night
2015-07-07 19:30:00	2015-07-07 19:30:00	26.744	26.891	26.793	26.818	26.256	26.549	Night
2015-07-07 19:45:00	2015-07-07 19:45:00	26.72	26.867	26.769	26.793	26.28	26.5	Night
2015-07-07 20:00:00	2015-07-07 20:00:00	26.671	26.818	26.744	26.769	26.28	26.5	Night
2015-07-07 20:15:00	2015-07-07 20:15:00	26.646	26.793	26.695	26.744	26.28	26.475	Night
2015-07-07 20:30:00	2015-07-07 20:30:00	26.622	26.744	26.695	26.72	26.28	26.475	Night
2015-07-07 20:45:00	2015-07-07 20:45:00	26.598	26.72	26.671	26.695	26.28	26.451	Night
2015-07-07 21:00:00	2015-07-07 21:00:00	26.573	26.695	26.646	26.695	26.28	26.451	Night
2015-07-07 21:15:00	2015-07-07 21:15:00	26.549	26.646	26.622	26.671	26.28	26.451	Night
2015-07-07 21:30:00	2015-07-07 21:30:00	26.524	26.622	26.598	26.646	26.28	26.451	Night
2015-07-07 21:45:00	2015-07-07 21:45:00	26.5	26.598	26.573	26.598	26.28	26.451	Night
2015-07-07 22:00:00	2015-07-07 22:00:00	26.475	26.573	26.549	26.573	26.28	26.451	Night
2015-07-07 22:15:00	2015-07-07 22:15:00	26.451	26.549	26.5	26.549	26.28	26.475	Night
2015-07-07 22:30:00	2015-07-07 22:30:00	26.426	26.5	26.475	26.524	26.28	26.475	Night
2015-07-07 22:45:00	2015-07-07 22:45:00	26.402	26.475	26.451	26.5	26.28	26.451	Night
2015-07-07 23:00:00	2015-07-07 23:00:00	26.378	26.451	26.426	26.451	26.28	26.451	Night
2015-07-07 23:15:00	2015-07-07 23:15:00	26.378	26.402	26.402	26.426	26.28	26.426	Night
2015-07-07 23:30:00	2015-07-07 23:30:00	26.353	26.378	26.378	26.402	26.28	26.426	Night
2015-07-07 23:45:00	2015-07-07 23:45:00	26.353	26.353	26.353	26.402	26.304	26.402	Night
2015-07-08	2015-07-08	26.329	26.353	26.353	26.378	26.329	26.402	Night
2015-07-08 00:15:00	2015-07-08 00:15:00	26.329	26.329	26.329	26.378	26.329	26.378	Night
2015-07-08 00:30:00	2015-07-08 00:30:00	26.304	26.304	26.329	26.353	26.353	26.378	Night
2015-07-08 00:45:00	2015-07-08 00:45:00	26.304	26.304	26.304	26.353	26.231	26.378	Night
2015-07-08 01:00:00	2015-07-08 01:00:00	26.304	26.28	26.304	26.329	26.134	26.378	Night
2015-07-08 01:15:00	2015-07-08 01:15:00	26.304	26.28	26.28	26.304	26.158	26.353	Night
2015-07-08 01:30:00	2015-07-08 01:30:00	26.304	26.256	26.256	26.304	26.207	26.353	Night
2015-07-08 01:45:00	2015-07-08 01:45:00	26.28	26.256	26.256	26.28	26.182	26.353	Night
2015-07-08 02:00:00	2015-07-08 02:00:00	26.28	26.231	26.256	26.28	26.158	26.353	Night
2015-07-08 02:15:00	2015-07-08 02:15:00	26.28	26.207	26.256	26.28	26.182	26.353	Night
2015-07-08 02:30:00	2015-07-08 02:30:00	26.256	26.207	26.231	26.256	26.207	26.329	Night
2015-07-08 02:45:00	2015-07-08 02:45:00	26.256	26.182	26.231	26.256	26.182	26.329	Night
2015-07-08 03:00:00	2015-07-08 03:00:00	26.256	26.158	26.207	26.256	26.109	26.304	Night
2015-07-08 03:15:00	2015-07-08 03:15:00	26.256	26.158	26.207	26.231	26.061	26.304	Night
2015-07-08 03:30:00	2015-07-08 03:30:00	26.231	26.134	26.207	26.231	26.012	26.28	Night
2015-07-08 03:45:00	2015-07-08 03:45:00	26.231	26.109	26.207	26.231	25.89	26.28	Night
2015-07-08 04:00:00	2015-07-08 04:00:00	26.231	26.109	26.182	26.207	25.817	26.256	Night
2015-07-08 04:15:00	2015-07-08 04:15:00	26.207	26.085	26.182	26.207	25.817	26.231	Night
2015-07-08 04:30:00	2015-07-08 04:30:00	26.207	26.061	26.182	26.207	25.841	26.207	Night
2015-07-08 04:45:00	2015-07-08 04:45:00	26.207	26.061	26.207	26.207	25.914	26.182	Night
2015-07-08 05:00:00	2015-07-08 05:00:00	26.207	26.061	26.207	26.231	25.963	26.182	Night
2015-07-08 05:15:00	2015-07-08 05:15:00	26.207	26.061	26.207	26.231	25.963	26.158	Night
2015-07-08 05:30:00	2015-07-08 05:30:00	26.207	26.061	26.207	26.231	25.987	26.158	Night
2015-07-08 05:45:00	2015-07-08 05:45:00	26.207	26.085	26.182	26.207	26.012	26.134	Night
2015-07-08 06:00:00	2015-07-08 06:00:00	26.182	26.085	26.182	26.207	26.012	26.134	Night
2015-07-08 06:15:00	2015-07-08 06:15:00	26.182	26.085	26.158	26.182	26.012	26.109	Night
2015-07-08 06:30:00	2015-07-08 06:30:00	26.182	26.085	26.158	26.182	26.012	26.085	Night
2015-07-08 06:45:00	2015-07-08 06:45:00	26.158	26.085	26.158	26.182	26.036	26.085	Night
2015-07-08 07:00:00	2015-07-08 07:00:00	26.158	26.085	26.158	26.158	26.061	26.061	Night
2015-07-08 07:15:00	2015-07-08 07:15:00	26.158	26.085	26.158	26.158	26.061	26.036	Night
2015-07-08 07:30:00	2015-07-08 07:30:00	26.158	26.109	26.158	26.158	26.061	26.036	Night
2015-07-08 07:45:00	2015-07-08 07:45:00	26.158	26.109	26.158	26.158	26.061	26.012	Night
2015-07-08 08:00:00	2015-07-08 08:00:00	26.158	26.109	26.158	26.158	26.061	26.012	Night
2015-07-08 08:15:00	2015-07-08 08:15:00	26.158	26.134	26.158	26.158	26.085	26.036	Night
2015-07-08 08:30:00	2015-07-08 08:30:00	26.158	26.158	26.182	26.182	26.061	26.085	Night
2015-07-08 08:45:00	2015-07-08 08:45:00	26.158	26.207	26.207	26.182	26.061	26.134	Night
2015-07-08 09:00:00	2015-07-08 09:00:00	26.158	26.231	26.231	26.207	26.061	26.182	Night
2015-07-08 09:15:00	2015-07-08 09:15:00	26.182	26.256	26.256	26.231	26.085	26.256	Night
2015-07-08 09:30:00	2015-07-08 09:30:00	26.207	26.304	26.28	26.256	26.109	26.304	Night
2015-07-08 09:45:00	2015-07-08 09:45:00	26.231	26.353	26.329	26.304	26.158	26.353	Night
2015-07-08 10:00:00	2015-07-08 10:00:00	26.256	26.378	26.353	26.329	26.182	26.402	Night
2015-07-08 10:15:00	2015-07-08 10:15:00	26.28	26.426	26.402	26.353	26.231	26.475	Night
2015-07-08 10:30:00	2015-07-08 10:30:00	26.304	26.475	26.451	26.402	26.256	26.5	Night
2015-07-08 10:45:00	2015-07-08 10:45:00	26.353	26.549	26.5	26.451	26.28	26.549	Night
2015-07-08 11:00:00	2015-07-08 11:00:00	26.378	26.598	26.524	26.5	26.329	26.573	Day
2015-07-08 11:15:00	2015-07-08 11:15:00	26.402	26.646	26.573	26.524	26.353	26.622	Day
2015-07-08 11:30:00	2015-07-08 11:30:00	26.451	26.72	26.598	26.573	26.402	26.695	Day
2015-07-08 11:45:00	2015-07-08 11:45:00	26.5	26.793	26.671	26.622	26.451	26.744	Day
2015-07-08 12:00:00	2015-07-08 12:00:00	26.549	26.891	26.744	26.695	26.5	26.793	Day
2015-07-08 12:15:00	2015-07-08 12:15:00	26.598	26.965	26.818	26.744	26.549	26.818	Day
2015-07-08 12:30:00	2015-07-08 12:30:00	26.646	27.038	26.867	26.793	26.598	26.842	Day
2015-07-08 12:45:00	2015-07-08 12:45:00	26.695	27.112	26.916	26.842	26.598	26.842	Day
2015-07-08 13:00:00	2015-07-08 13:00:00	26.744	27.161	26.965	26.891	26.622	26.867	Day
2015-07-08 13:15:00	2015-07-08 13:15:00	26.793	27.235	27.038	26.94	26.646	26.891	Day
2015-07-08 13:30:00	2015-07-08 13:30:00	26.842	27.259	27.087	26.989	26.671	26.94	Day
2015-07-08 13:45:00	2015-07-08 13:45:00	26.867	27.308	27.087	27.038	26.695	26.965	Day
2015-07-08 14:00:00	2015-07-08 14:00:00	26.891	27.333	27.112	27.038	26.72	26.965	Day
2015-07-08 14:15:00	2015-07-08 14:15:00	26.94	27.358	27.136	27.063	26.769	26.989	Night
2015-07-08 14:30:00	2015-07-08 14:30:00	26.965	27.382	27.161	27.087	26.793	27.014	Night
2015-07-08 14:45:00	2015-07-08 14:45:00	27.014	27.431	27.186	27.112	26.793	27.038	Night
2015-07-08 15:00:00	2015-07-08 15:00:00	27.063	27.456	27.21	27.136	26.818	27.063	Night
2015-07-08 15:15:00	2015-07-08 15:15:00	27.112	27.505	27.21	27.161	26.842	27.063	Night
2015-07-08 15:30:00	2015-07-08 15:30:00	27.136	27.554	27.235	27.186	26.867	27.087	Night
2015-07-08 15:45:00	2015-07-08 15:45:00	27.161	27.579	27.235	27.186	26.891	27.087	Night
2015-07-08 16:00:00	2015-07-08 16:00:00	27.186	27.579	27.259	27.21	26.891	27.112	Night
2015-07-08 16:15:00	2015-07-08 16:15:00	27.235	27.604	27.284	27.235	26.916	27.112	Night
2015-07-08 16:30:00	2015-07-08 16:30:00	27.235	27.604	27.284	27.235	26.891	27.136	Night
2015-07-08 16:45:00	2015-07-08 16:45:00	27.259	27.604	27.284	27.259	26.793	27.136	Night
2015-07-08 17:00:00	2015-07-08 17:00:00	27.284	27.604	27.284	27.259	26.671	27.136	Night
2015-07-08 17:15:00	2015-07-08 17:15:00	27.308	27.604	27.259	27.259	26.598	27.136	Night
2015-07-08 17:30:00	2015-07-08 17:30:00	27.308	27.579	27.259	27.259	26.549	27.136	Night
2015-07-08 17:45:00	2015-07-08 17:45:00	27.308	27.554	27.235	27.259	26.524	27.136	Night
2015-07-08 18:00:00	2015-07-08 18:00:00	27.308	27.53	27.235	27.259	26.5	27.087	Night
2015-07-08 18:15:00	2015-07-08 18:15:00	27.308	27.505	27.235	27.259	26.524	27.063	Night
2015-07-08 18:30:00	2015-07-08 18:30:00	27.284	27.481	27.235	27.259	26.524	27.038	Night
2015-07-08 18:45:00	2015-07-08 18:45:00	27.284	27.431	27.259	27.259	26.549	27.038	Night
2015-07-08 19:00:00	2015-07-08 19:00:00	27.259	27.382	27.259	27.284	26.549	27.063	Night
2015-07-08 19:15:00	2015-07-08 19:15:00	27.235	27.358	27.259	27.284	26.549	27.087	Night
2015-07-08 19:30:00	2015-07-08 19:30:00	27.21	27.333	27.259	27.284	26.598	27.087	Night
2015-07-08 19:45:00	2015-07-08 19:45:00	27.21	27.284	27.259	27.259	26.598	27.063	Night
2015-07-08 20:00:00	2015-07-08 20:00:00	27.186	27.259	27.235	27.259	26.549	27.038	Night
2015-07-08 20:15:00	2015-07-08 20:15:00	27.186	27.235	27.21	27.235	26.524	26.989	Night
2015-07-08 20:30:00	2015-07-08 20:30:00	27.186	27.186	27.21	27.235	26.549	26.965	Night
2015-07-08 20:45:00	2015-07-08 20:45:00	27.186	27.186	27.186	27.21	26.573	26.916	Night
2015-07-08 21:00:00	2015-07-08 21:00:00	27.161	27.161	27.186	27.21	26.573	26.842	Night
2015-07-08 21:15:00	2015-07-08 21:15:00	27.161	27.136	27.161	27.186	26.598	26.793	Night
2015-07-08 21:30:00	2015-07-08 21:30:00	27.136	27.112	27.136	27.161	26.598	26.793	Night
2015-07-08 21:45:00	2015-07-08 21:45:00	27.136	27.087	27.136	27.161	26.598	26.818	Night
2015-07-08 22:00:00	2015-07-08 22:00:00	27.136	27.087	27.112	27.136	26.598	26.818	Night
2015-07-08 22:15:00	2015-07-08 22:15:00	27.112	27.038	27.087	27.112	26.598	26.842	Night
2015-07-08 22:30:00	2015-07-08 22:30:00	27.087	27.038	27.063	27.087	26.598	26.842	Night
2015-07-08 22:45:00	2015-07-08 22:45:00	27.038	26.989	27.038	27.063	26.646	26.867	Night
2015-07-08 23:00:00	2015-07-08 23:00:00	27.014	26.965	27.014	27.038	26.671	26.867	Night
2015-07-08 23:15:00	2015-07-08 23:15:00	26.989	26.94	26.989	27.038	26.671	26.891	Night
2015-07-08 23:30:00	2015-07-08 23:30:00	26.965	26.916	26.965	26.989	26.671	26.867	Night
2015-07-08 23:45:00	2015-07-08 23:45:00	26.94	26.891	26.94	26.965	26.671	26.867	Night
2015-07-09	2015-07-09	26.891	26.842	26.891	26.94	26.671	26.867	Night
2015-07-09 00:15:00	2015-07-09 00:15:00	26.867	26.818	26.867	26.916	26.646	26.842	Night
2015-07-09 00:30:00	2015-07-09 00:30:00	26.842	26.793	26.842	26.891	26.646	26.818	Night
2015-07-09 00:45:00	2015-07-09 00:45:00	26.818	26.769	26.818	26.842	26.622	26.818	Night
2015-07-09 01:00:00	2015-07-09 01:00:00	26.793	26.744	26.793	26.818	26.622	26.793	Night
2015-07-09 01:15:00	2015-07-09 01:15:00	26.793	26.72	26.744	26.793	26.622	26.769	Night
2015-07-09 01:30:00	2015-07-09 01:30:00	26.769	26.695	26.744	26.769	26.622	26.744	Night
2015-07-09 01:45:00	2015-07-09 01:45:00	26.744	26.646	26.695	26.744	26.598	26.744	Night
2015-07-09 02:00:00	2015-07-09 02:00:00	26.744	26.622	26.671	26.72	26.622	26.72	Night
2015-07-09 02:15:00	2015-07-09 02:15:00	26.72	26.598	26.646	26.695	26.598	26.72	Night
2015-07-09 02:30:00	2015-07-09 02:30:00	26.695	26.549	26.622	26.671	26.598	26.695	Night
2015-07-09 02:45:00	2015-07-09 02:45:00	26.695	26.524	26.598	26.646	26.598	26.671	Night
2015-07-09 03:00:00	2015-07-09 03:00:00	26.671	26.5	26.573	26.622	26.598	26.646	Night
2015-07-09 03:15:00	2015-07-09 03:15:00	26.671	26.475	26.573	26.598	26.573	26.646	Night
2015-07-09 03:30:00	2015-07-09 03:30:00	26.646	26.451	26.549	26.598	26.549	26.622	Night
2015-07-09 03:45:00	2015-07-09 03:45:00	26.622	26.402	26.524	26.549	26.451	26.598	Night
2015-07-09 04:00:00	2015-07-09 04:00:00	26.622	26.402	26.5	26.549	26.426	26.573	Night
2015-07-09 04:15:00	2015-07-09 04:15:00	26.598	26.353	26.5	26.549	26.402	26.549	Night
2015-07-09 04:30:00	2015-07-09 04:30:00	26.598	26.329	26.475	26.524	26.378	26.549	Night
2015-07-09 04:45:00	2015-07-09 04:45:00	26.573	26.304	26.475	26.5	26.353	26.524	Night
2015-07-09 05:00:00	2015-07-09 05:00:00	26.573	26.304	26.451	26.5	26.329	26.5	Night
2015-07-09 05:15:00	2015-07-09 05:15:00	26.549	26.28	26.451	26.475	26.28	26.5	Night
2015-07-09 05:30:00	2015-07-09 05:30:00	26.549	26.256	26.451	26.475	26.207	26.475	Night
2015-07-09 05:45:00	2015-07-09 05:45:00	26.549	26.231	26.451	26.475	26.182	26.451	Night
2015-07-09 06:00:00	2015-07-09 06:00:00	26.524	26.207	26.451	26.475	26.158	26.426	Night
2015-07-09 06:15:00	2015-07-09 06:15:00	26.524	26.207	26.451	26.475	26.158	26.402	Night
2015-07-09 06:30:00	2015-07-09 06:30:00	26.5	26.182	26.451	26.475	26.158	26.402	Night
2015-07-09 06:45:00	2015-07-09 06:45:00	26.5	26.182	26.451	26.475	26.158	26.378	Night
2015-07-09 07:00:00	2015-07-09 07:00:00	26.5	26.182	26.451	26.475	26.158	26.378	Night
2015-07-09 07:15:00	2015-07-09 07:15:00	26.5	26.182	26.451	26.451	26.158	26.378	Night
2015-07-09 07:30:00	2015-07-09 07:30:00	26.475	26.207	26.451	26.451	26.158	26.353	Night
2015-07-09 07:45:00	2015-07-09 07:45:00	26.475	26.231	26.451	26.451	26.158	26.353	Night
2015-07-09 08:00:00	2015-07-09 08:00:00	26.475	26.256	26.475	26.475	26.158	26.353	Night
2015-07-09 08:15:00	2015-07-09 08:15:00	26.475	26.28	26.5	26.475	26.158	26.353	Night
2015-07-09 08:30:00	2015-07-09 08:30:00	26.5	26.329	26.5	26.5	26.158	26.329	Night
2015-07-09 08:45:00	2015-07-09 08:45:00	26.5	26.353	26.524	26.5	26.158	26.329	Night
2015-07-09 09:00:00	2015-07-09 09:00:00	26.5	26.402	26.524	26.524	26.182	26.353	Night
2015-07-09 09:15:00	2015-07-09 09:15:00	26.5	26.451	26.549	26.549	26.182	26.353	Night
2015-07-09 09:30:00	2015-07-09 09:30:00	26.524	26.475	26.549	26.549	26.182	26.353	Night
2015-07-09 09:45:00	2015-07-09 09:45:00	26.524	26.5	26.573	26.573	26.207	26.353	Night
2015-07-09 10:00:00	2015-07-09 10:00:00	26.524	26.549	26.598	26.573	26.231	26.353	Night
2015-07-09 10:15:00	2015-07-09 10:15:00	26.524	26.549	26.598	26.598	26.256	26.353	Night
2015-07-09 10:30:00	2015-07-09 10:30:00	26.549	26.598	26.646	26.622	26.256	26.378	Night
2015-07-09 10:45:00	2015-07-09 10:45:00	26.549	26.622	26.671	26.671	26.256	26.378	Night
2015-07-09 11:00:00	2015-07-09 11:00:00	26.549	26.646	26.695	26.695	26.304	26.402	Day
2015-07-09 11:15:00	2015-07-09 11:15:00	26.573	26.671	26.72	26.695	26.329	26.402	Day
2015-07-09 11:30:00	2015-07-09 11:30:00	26.573	26.72	26.744	26.72	26.353	26.426	Day
2015-07-09 11:45:00	2015-07-09 11:45:00	26.598	26.769	26.769	26.769	26.402	26.451	Day
2015-07-09 12:00:00	2015-07-09 12:00:00	26.646	26.818	26.842	26.818	26.426	26.5	Day
2015-07-09 12:15:00	2015-07-09 12:15:00	26.671	26.891	26.916	26.867	26.451	26.573	Day
2015-07-09 12:30:00	2015-07-09 12:30:00	26.72	26.94	26.965	26.916	26.5	26.622	Day
2015-07-09 12:45:00	2015-07-09 12:45:00	26.769	27.014	27.014	26.94	26.524	26.695	Day
2015-07-09 13:00:00	2015-07-09 13:00:00	26.793	27.063	27.063	26.989	26.573	26.744	Day
2015-07-09 13:15:00	2015-07-09 13:15:00	26.842	27.112	27.112	27.038	26.622	26.793	Day
2015-07-09 13:30:00	2015-07-09 13:30:00	26.867	27.161	27.136	27.087	26.671	26.842	Day
2015-07-09 13:45:00	2015-07-09 13:45:00	26.916	27.21	27.186	27.112	26.695	26.867	Day
2015-07-09 14:00:00	2015-07-09 14:00:00	26.94	27.235	27.21	27.136	26.72	26.891	Day
2015-07-09 14:15:00	2015-07-09 14:15:00	26.965	27.259	27.235	27.186	26.744	26.94	Night
2015-07-09 14:30:00	2015-07-09 14:30:00	26.989	27.284	27.235	27.186	26.744	26.965	Night
2015-07-09 14:45:00	2015-07-09 14:45:00	26.989	27.333	27.259	27.21	26.744	26.989	Night
2015-07-09 15:00:00	2015-07-09 15:00:00	27.014	27.358	27.235	27.21	26.744	27.014	Night
2015-07-09 15:15:00	2015-07-09 15:15:00	27.014	27.382	27.235	27.21	26.769	27.014	Night
2015-07-09 15:30:00	2015-07-09 15:30:00	27.038	27.407	27.235	27.21	26.769	27.014	Night
2015-07-09 15:45:00	2015-07-09 15:45:00	27.063	27.456	27.235	27.21	26.769	27.014	Night
2015-07-09 16:00:00	2015-07-09 16:00:00	27.087	27.456	27.21	27.21	26.769	27.014	Night
2015-07-09 16:15:00	2015-07-09 16:15:00	27.087	27.481	27.21	27.186	26.769	26.989	Night
2015-07-09 16:30:00	2015-07-09 16:30:00	27.112	27.505	27.21	27.186	26.769	26.989	Night
2015-07-09 16:45:00	2015-07-09 16:45:00	27.136	27.53	27.21	27.186	26.769	26.965	Night
2015-07-09 17:00:00	2015-07-09 17:00:00	27.136	27.505	27.186	27.186	26.769	26.94	Night
2015-07-09 17:15:00	2015-07-09 17:15:00	27.136	27.505	27.161	27.186	26.793	26.94	Night
2015-07-09 17:30:00	2015-07-09 17:30:00	27.136	27.505	27.161	27.161	26.793	26.94	Night
2015-07-09 17:45:00	2015-07-09 17:45:00	27.136	27.505	27.161	27.161	26.72	26.94	Night
2015-07-09 18:00:00	2015-07-09 18:00:00	27.136	27.505	27.161	27.161	26.622	26.94	Night
2015-07-09 18:15:00	2015-07-09 18:15:00	27.136	27.481	27.136	27.161	26.573	26.94	Night
2015-07-09 18:30:00	2015-07-09 18:30:00	27.136	27.481	27.112	27.136	26.549	26.916	Night
2015-07-09 18:45:00	2015-07-09 18:45:00	27.112	27.431	27.087	27.112	26.475	26.94	Night
2015-07-09 19:00:00	2015-07-09 19:00:00	27.112	27.407	27.063	27.087	26.451	26.94	Night
2015-07-09 19:15:00	2015-07-09 19:15:00	27.087	27.358	27.014	27.063	26.451	26.916	Night
2015-07-09 19:30:00	2015-07-09 19:30:00	27.063	27.284	26.989	27.038	26.451	26.891	Night
2015-07-09 19:45:00	2015-07-09 19:45:00	27.038	27.186	26.965	27.014	26.475	26.867	Night
2015-07-09 20:00:00	2015-07-09 20:00:00	27.014	27.136	26.94	26.989	26.475	26.891	Night
2015-07-09 20:15:00	2015-07-09 20:15:00	26.989	27.063	26.94	26.965	26.378	26.891	Night
2015-07-09 20:30:00	2015-07-09 20:30:00	26.965	27.014	26.916	26.94	26.353	26.916	Night
2015-07-09 20:45:00	2015-07-09 20:45:00	26.965	26.965	26.891	26.916	26.353	26.867	Night
2015-07-09 21:00:00	2015-07-09 21:00:00	26.94	26.94	26.867	26.891	26.353	26.818	Night
2015-07-09 21:15:00	2015-07-09 21:15:00	26.916	26.891	26.842	26.891	26.378	26.744	Night
2015-07-09 21:30:00	2015-07-09 21:30:00	26.916	26.867	26.842	26.867	26.378	26.695	Night
2015-07-09 21:45:00	2015-07-09 21:45:00	26.891	26.842	26.842	26.867	26.402	26.695	Night
2015-07-09 22:00:00	2015-07-09 22:00:00	26.891	26.818	26.818	26.842	26.402	26.695	Night
2015-07-09 22:15:00	2015-07-09 22:15:00	26.867	26.793	26.818	26.842	26.426	26.695	Night
2015-07-09 22:30:00	2015-07-09 22:30:00	26.867	26.793	26.818	26.842	26.475	26.72	Night
2015-07-09 22:45:00	2015-07-09 22:45:00	26.867	26.769	26.818	26.842	26.5	26.744	Night
2015-07-09 23:00:00	2015-07-09 23:00:00	26.842	26.744	26.793	26.818	26.5	26.72	Night
2015-07-09 23:15:00	2015-07-09 23:15:00	26.842	26.744	26.793	26.818	26.5	26.72	Night
2015-07-09 23:30:00	2015-07-09 23:30:00	26.818	26.744	26.769	26.793	26.524	26.72	Night
2015-07-09 23:45:00	2015-07-09 23:45:00	26.818	26.72	26.769	26.793	26.549	26.72	Night
2015-07-10	2015-07-10	26.793	26.72	26.769	26.793	26.573	26.72	Night
2015-07-10 00:15:00	2015-07-10 00:15:00	26.793	26.695	26.744	26.769	26.573	26.695	Night
2015-07-10 00:30:00	2015-07-10 00:30:00	26.769	26.695	26.744	26.769	26.573	26.695	Night
2015-07-10 00:45:00	2015-07-10 00:45:00	26.744	26.671	26.72	26.744	26.573	26.695	Night
2015-07-10 01:00:00	2015-07-10 01:00:00	26.744	26.671	26.695	26.744	26.573	26.695	Night
2015-07-10 01:15:00	2015-07-10 01:15:00	26.72	26.646	26.695	26.72	26.573	26.671	Night
2015-07-10 01:30:00	2015-07-10 01:30:00	26.72	26.646	26.695	26.72	26.573	26.671	Night
2015-07-10 01:45:00	2015-07-10 01:45:00	26.695	26.622	26.671	26.695	26.573	26.671	Night
2015-07-10 02:00:00	2015-07-10 02:00:00	26.695	26.622	26.646	26.671	26.573	26.646	Night
2015-07-10 02:15:00	2015-07-10 02:15:00	26.671	26.598	26.622	26.671	26.549	26.646	Night
2015-07-10 02:30:00	2015-07-10 02:30:00	26.671	26.573	26.598	26.646	26.549	26.646	Night
2015-07-10 02:45:00	2015-07-10 02:45:00	26.646	26.573	26.598	26.622	26.549	26.622	Night
2015-07-10 03:00:00	2015-07-10 03:00:00	26.646	26.549	26.573	26.598	26.549	26.598	Night
2015-07-10 03:15:00	2015-07-10 03:15:00	26.622	26.549	26.549	26.573	26.549	26.598	Night
2015-07-10 03:30:00	2015-07-10 03:30:00	26.598	26.524	26.549	26.573	26.549	26.573	Night
2015-07-10 03:45:00	2015-07-10 03:45:00	26.598	26.5	26.524	26.549	26.549	26.549	Night
2015-07-10 04:00:00	2015-07-10 04:00:00	26.598	26.475	26.524	26.549	26.549	26.549	Night
2015-07-10 04:15:00	2015-07-10 04:15:00	26.573	26.475	26.5	26.549	26.549	26.549	Night
2015-07-10 04:30:00	2015-07-10 04:30:00	26.573	26.451	26.5	26.524	26.549	26.524	Night
2015-07-10 04:45:00	2015-07-10 04:45:00	26.549	26.426	26.475	26.5	26.549	26.524	Night
2015-07-10 05:00:00	2015-07-10 05:00:00	26.549	26.402	26.451	26.5	26.524	26.5	Night
2015-07-10 05:15:00	2015-07-10 05:15:00	26.549	26.402	26.451	26.475	26.524	26.5	Night
2015-07-10 05:30:00	2015-07-10 05:30:00	26.524	26.378	26.426	26.451	26.5	26.5	Night
2015-07-10 05:45:00	2015-07-10 05:45:00	26.5	26.353	26.426	26.451	26.5	26.475	Night
2015-07-10 06:00:00	2015-07-10 06:00:00	26.5	26.353	26.402	26.451	26.5	26.475	Night
2015-07-10 06:15:00	2015-07-10 06:15:00	26.5	26.329	26.402	26.426	26.5	26.475	Night
2015-07-10 06:30:00	2015-07-10 06:30:00	26.5	26.329	26.402	26.426	26.5	26.451	Night
2015-07-10 06:45:00	2015-07-10 06:45:00	26.5	26.304	26.426	26.451	26.475	26.451	Night
2015-07-10 07:00:00	2015-07-10 07:00:00	26.5	26.304	26.426	26.451	26.5	26.451	Night
2015-07-10 07:15:00	2015-07-10 07:15:00	26.5	26.304	26.451	26.451	26.475	26.451	Night
2015-07-10 07:30:00	2015-07-10 07:30:00	26.5	26.304	26.451	26.475	26.5	26.451	Night
2015-07-10 07:45:00	2015-07-10 07:45:00	26.5	26.304	26.475	26.475	26.5	26.451	Night
2015-07-10 08:00:00	2015-07-10 08:00:00	26.5	26.329	26.475	26.475	26.5	26.451	Night
2015-07-10 08:15:00	2015-07-10 08:15:00	26.5	26.353	26.5	26.5	26.5	26.451	Night
2015-07-10 08:30:00	2015-07-10 08:30:00	26.524	26.378	26.524	26.5	26.5	26.475	Night
2015-07-10 08:45:00	2015-07-10 08:45:00	26.524	26.402	26.549	26.524	26.5	26.475	Night
2015-07-10 09:00:00	2015-07-10 09:00:00	26.549	26.451	26.549	26.549	26.5	26.475	Night
2015-07-10 09:15:00	2015-07-10 09:15:00	26.549	26.475	26.549	26.549	26.5	26.475	Night
2015-07-10 09:30:00	2015-07-10 09:30:00	26.549	26.5	26.573	26.573	26.5	26.5	Night
2015-07-10 09:45:00	2015-07-10 09:45:00	26.549	26.549	26.598	26.598	26.5	26.5	Night
2015-07-10 10:00:00	2015-07-10 10:00:00	26.549	26.573	26.598	26.598	26.5	26.5	Night
2015-07-10 10:15:00	2015-07-10 10:15:00	26.549	26.598	26.622	26.622	26.5	26.524	Night
2015-07-10 10:30:00	2015-07-10 10:30:00	26.573	26.646	26.646	26.646	26.524	26.549	Night
2015-07-10 10:45:00	2015-07-10 10:45:00	26.573	26.671	26.671	26.671	26.524	26.549	Night
2015-07-10 11:00:00	2015-07-10 11:00:00	26.598	26.695	26.72	26.695	26.524	26.573	Day
2015-07-10 11:15:00	2015-07-10 11:15:00	26.622	26.744	26.769	26.744	26.549	26.598	Day
2015-07-10 11:30:00	2015-07-10 11:30:00	26.646	26.793	26.842	26.818	26.549	26.598	Day
2015-07-10 11:45:00	2015-07-10 11:45:00	26.695	26.842	26.916	26.891	26.573	26.646	Day
2015-07-10 12:00:00	2015-07-10 12:00:00	26.72	26.916	26.989	26.965	26.598	26.671	Day
2015-07-10 12:15:00	2015-07-10 12:15:00	26.769	26.989	27.087	27.038	26.622	26.695	Day
2015-07-10 12:30:00	2015-07-10 12:30:00	26.842	27.063	27.161	27.136	26.646	26.72	Day
2015-07-10 12:45:00	2015-07-10 12:45:00	26.891	27.112	27.284	27.21	26.671	26.769	Day
2015-07-10 13:00:00	2015-07-10 13:00:00	26.94	27.186	27.358	27.308	26.695	26.818	Day
2015-07-10 13:15:00	2015-07-10 13:15:00	26.989	27.235	27.431	27.382	26.72	26.818	Day
2015-07-10 13:30:00	2015-07-10 13:30:00	27.038	27.308	27.481	27.431	26.744	26.842	Day
2015-07-10 13:45:00	2015-07-10 13:45:00	27.087	27.358	27.554	27.505	26.769	26.891	Day
2015-07-10 14:00:00	2015-07-10 14:00:00	27.161	27.382	27.579	27.53	26.793	26.94	Day
2015-07-10 14:15:00	2015-07-10 14:15:00	27.186	27.407	27.579	27.554	26.842	27.014	Night
2015-07-10 14:30:00	2015-07-10 14:30:00	27.235	27.407	27.628	27.604	26.842	27.038	Night
2015-07-10 14:45:00	2015-07-10 14:45:00	27.235	27.407	27.702	27.677	26.867	27.063	Night
2015-07-10 15:00:00	2015-07-10 15:00:00	27.259	27.407	27.751	27.727	26.891	27.063	Night
2015-07-10 15:15:00	2015-07-10 15:15:00	27.259	27.407	27.776	27.727	26.916	27.112	Night
2015-07-10 15:30:00	2015-07-10 15:30:00	27.259	27.407	27.727	27.727	26.916	27.087	Night
2015-07-10 15:45:00	2015-07-10 15:45:00	27.259	27.407	27.677	27.677	26.916	27.063	Night
2015-07-10 16:00:00	2015-07-10 16:00:00	27.259	27.407	27.628	27.653	26.72	27.038	Night
2015-07-10 16:15:00	2015-07-10 16:15:00	27.259	27.407	27.579	27.604	26.646	27.038	Night
2015-07-10 16:30:00	2015-07-10 16:30:00	27.259	27.407	27.53	27.554	26.646	27.112	Night
2015-07-10 16:45:00	2015-07-10 16:45:00	27.259	27.431	27.505	27.554	26.646	27.112	Night
2015-07-10 17:00:00	2015-07-10 17:00:00	27.259	27.456	27.505	27.53	26.695	27.038	Night
2015-07-10 17:15:00	2015-07-10 17:15:00	27.284	27.481	27.481	27.505	26.695	27.038	Night
2015-07-10 17:30:00	2015-07-10 17:30:00	27.284	27.481	27.456	27.481	26.671	27.087	Night
2015-07-10 17:45:00	2015-07-10 17:45:00	27.284	27.505	27.431	27.456	26.646	27.136	Night
2015-07-10 18:00:00	2015-07-10 18:00:00	27.284	27.505	27.382	27.431	26.646	27.136	Night
2015-07-10 18:15:00	2015-07-10 18:15:00	27.284	27.481	27.358	27.382	26.646	27.112	Night
2015-07-10 18:30:00	2015-07-10 18:30:00	27.259	27.481	27.308	27.358	26.646	27.136	Night
2015-07-10 18:45:00	2015-07-10 18:45:00	27.259	27.431	27.284	27.333	26.622	27.161	Night
2015-07-10 19:00:00	2015-07-10 19:00:00	27.235	27.407	27.259	27.308	26.549	27.186	Night
2015-07-10 19:15:00	2015-07-10 19:15:00	27.235	27.382	27.235	27.259	26.475	27.038	Night
2015-07-10 19:30:00	2015-07-10 19:30:00	27.21	27.333	27.186	27.235	26.451	26.989	Night
2015-07-10 19:45:00	2015-07-10 19:45:00	27.186	27.308	27.161	27.21	26.451	26.989	Night
2015-07-10 20:00:00	2015-07-10 20:00:00	27.161	27.259	27.136	27.186	26.426	27.014	Night
2015-07-10 20:15:00	2015-07-10 20:15:00	27.136	27.21	27.112	27.136	26.426	26.989	Night
2015-07-10 20:30:00	2015-07-10 20:30:00	27.112	27.186	27.063	27.112	26.426	26.989	Night
2015-07-10 20:45:00	2015-07-10 20:45:00	27.087	27.136	27.038	27.087	26.426	26.989	Night
2015-07-10 21:00:00	2015-07-10 21:00:00	27.063	27.087	27.014	27.063	26.426	26.989	Night
2015-07-10 21:15:00	2015-07-10 21:15:00	27.038	27.063	26.989	27.038	26.402	26.989	Night
2015-07-10 21:30:00	2015-07-10 21:30:00	27.038	27.014	26.965	27.014	26.378	26.965	Night
2015-07-10 21:45:00	2015-07-10 21:45:00	27.014	26.989	26.94	26.989	26.353	26.94	Night
2015-07-10 22:00:00	2015-07-10 22:00:00	26.989	26.94	26.94	26.965	26.329	26.891	Night
2015-07-10 22:15:00	2015-07-10 22:15:00	26.965	26.916	26.916	26.94	26.353	26.867	Night
2015-07-10 22:30:00	2015-07-10 22:30:00	26.94	26.891	26.891	26.94	26.353	26.818	Night
2015-07-10 22:45:00	2015-07-10 22:45:00	26.916	26.867	26.867	26.891	26.378	26.744	Night
2015-07-10 23:00:00	2015-07-10 23:00:00	26.891	26.842	26.842	26.891	26.402	26.744	Night
2015-07-10 23:15:00	2015-07-10 23:15:00	26.891	26.842	26.842	26.867	26.378	26.72	Night
2015-07-10 23:30:00	2015-07-10 23:30:00	26.867	26.818	26.818	26.842	26.378	26.695	Night
2015-07-10 23:45:00	2015-07-10 23:45:00	26.867	26.793	26.793	26.818	26.378	26.695	Night
2015-07-11	2015-07-11	26.842	26.769	26.769	26.818	26.402	26.695	Night
2015-07-11 00:15:00	2015-07-11 00:15:00	26.842	26.744	26.769	26.793	26.402	26.671	Night
2015-07-11 00:30:00	2015-07-11 00:30:00	26.818	26.744	26.744	26.769	26.451	26.671	Night
2015-07-11 00:45:00	2015-07-11 00:45:00	26.793	26.72	26.744	26.769	26.451	26.646	Night
2015-07-11 01:00:00	2015-07-11 01:00:00	26.793	26.695	26.72	26.744	26.475	26.646	Night
2015-07-11 01:15:00	2015-07-11 01:15:00	26.769	26.695	26.695	26.744	26.475	26.646	Night
2015-07-11 01:30:00	2015-07-11 01:30:00	26.744	26.671	26.695	26.72	26.5	26.646	Night
2015-07-11 01:45:00	2015-07-11 01:45:00	26.744	26.646	26.671	26.695	26.524	26.646	Night
2015-07-11 02:00:00	2015-07-11 02:00:00	26.72	26.646	26.671	26.695	26.524	26.622	Night
2015-07-11 02:15:00	2015-07-11 02:15:00	26.695	26.646	26.646	26.671	26.549	26.622	Night
2015-07-11 02:30:00	2015-07-11 02:30:00	26.695	26.622	26.646	26.671	26.549	26.598	Night
2015-07-11 02:45:00	2015-07-11 02:45:00	26.671	26.622	26.646	26.671	26.549	26.598	Night
2015-07-11 03:00:00	2015-07-11 03:00:00	26.646	26.598	26.622	26.646	26.549	26.598	Night
2015-07-11 03:15:00	2015-07-11 03:15:00	26.646	26.598	26.622	26.646	26.524	26.573	Night
2015-07-11 03:30:00	2015-07-11 03:30:00	26.646	26.573	26.598	26.646	26.5	26.573	Night
2015-07-11 03:45:00	2015-07-11 03:45:00	26.622	26.573	26.598	26.622	26.5	26.549	Night
2015-07-11 04:00:00	2015-07-11 04:00:00	26.622	26.549	26.573	26.598	26.475	26.549	Night
2015-07-11 04:15:00	2015-07-11 04:15:00	26.598	26.549	26.573	26.598	26.475	26.549	Night
2015-07-11 04:30:00	2015-07-11 04:30:00	26.598	26.524	26.549	26.573	26.475	26.549	Night
2015-07-11 04:45:00	2015-07-11 04:45:00	26.598	26.5	26.549	26.573	26.475	26.524	Night
2015-07-11 05:00:00	2015-07-11 05:00:00	26.573	26.475	26.524	26.549	26.475	26.524	Night
2015-07-11 05:15:00	2015-07-11 05:15:00	26.573	26.475	26.5	26.549	26.475	26.5	Night
2015-07-11 05:30:00	2015-07-11 05:30:00	26.573	26.451	26.5	26.524	26.451	26.5	Night
2015-07-11 05:45:00	2015-07-11 05:45:00	26.549	26.451	26.475	26.5	26.426	26.5	Night
2015-07-11 06:00:00	2015-07-11 06:00:00	26.549	26.426	26.475	26.5	26.402	26.5	Night
2015-07-11 06:15:00	2015-07-11 06:15:00	26.549	26.402	26.475	26.5	26.402	26.475	Night
2015-07-11 06:30:00	2015-07-11 06:30:00	26.549	26.402	26.475	26.5	26.402	26.475	Night
2015-07-11 06:45:00	2015-07-11 06:45:00	26.524	26.378	26.475	26.475	26.402	26.475	Night
2015-07-11 07:00:00	2015-07-11 07:00:00	26.524	26.378	26.475	26.475	26.426	26.451	Night
2015-07-11 07:15:00	2015-07-11 07:15:00	26.524	26.353	26.475	26.5	26.402	26.451	Night
2015-07-11 07:30:00	2015-07-11 07:30:00	26.524	26.353	26.5	26.5	26.378	26.451	Night
2015-07-11 07:45:00	2015-07-11 07:45:00	26.524	26.353	26.5	26.524	26.353	26.451	Night
2015-07-11 08:00:00	2015-07-11 08:00:00	26.549	26.353	26.524	26.549	26.353	26.451	Night
2015-07-11 08:15:00	2015-07-11 08:15:00	26.549	26.353	26.549	26.549	26.353	26.451	Night
2015-07-11 08:30:00	2015-07-11 08:30:00	26.549	26.402	26.549	26.549	26.329	26.451	Night
2015-07-11 08:45:00	2015-07-11 08:45:00	26.573	26.426	26.573	26.573	26.353	26.451	Night
2015-07-11 09:00:00	2015-07-11 09:00:00	26.573	26.451	26.598	26.598	26.353	26.451	Night
2015-07-11 09:15:00	2015-07-11 09:15:00	26.598	26.5	26.598	26.598	26.353	26.475	Night
2015-07-11 09:30:00	2015-07-11 09:30:00	26.598	26.549	26.622	26.622	26.353	26.475	Night
2015-07-11 09:45:00	2015-07-11 09:45:00	26.622	26.598	26.622	26.622	26.378	26.475	Night
2015-07-11 10:00:00	2015-07-11 10:00:00	26.622	26.646	26.646	26.646	26.378	26.5	Night
2015-07-11 10:15:00	2015-07-11 10:15:00	26.646	26.695	26.671	26.671	26.402	26.549	Night
2015-07-11 10:30:00	2015-07-11 10:30:00	26.671	26.744	26.695	26.695	26.304	26.573	Night
2015-07-11 10:45:00	2015-07-11 10:45:00	26.695	26.793	26.744	26.744	26.109	26.598	Night
2015-07-11 11:00:00	2015-07-11 11:00:00	26.72	26.842	26.769	26.769	26.061	26.622	Day
2015-07-11 11:15:00	2015-07-11 11:15:00	26.744	26.891	26.793	26.793	26.085	26.646	Day
2015-07-11 11:30:00	2015-07-11 11:30:00	26.769	26.94	26.842	26.842	26.109	26.671	Day
2015-07-11 11:45:00	2015-07-11 11:45:00	26.793	26.989	26.891	26.867	26.158	26.744	Day
2015-07-11 12:00:00	2015-07-11 12:00:00	26.842	27.038	26.94	26.94	26.182	26.793	Day
2015-07-11 12:15:00	2015-07-11 12:15:00	26.867	27.087	26.989	26.989	26.207	26.842	Day
2015-07-11 12:30:00	2015-07-11 12:30:00	26.916	27.112	27.063	27.038	26.231	26.867	Day
2015-07-11 12:45:00	2015-07-11 12:45:00	26.965	27.161	27.112	27.087	26.256	26.842	Day
2015-07-11 13:00:00	2015-07-11 13:00:00	27.014	27.186	27.161	27.136	26.28	26.867	Day
2015-07-11 13:15:00	2015-07-11 13:15:00	27.063	27.21	27.235	27.21	26.304	26.891	Day
2015-07-11 13:30:00	2015-07-11 13:30:00	27.112	27.259	27.284	27.284	26.353	26.916	Day
2015-07-11 13:45:00	2015-07-11 13:45:00	27.136	27.284	27.358	27.333	26.378	26.94	Day
2015-07-11 14:00:00	2015-07-11 14:00:00	27.186	27.333	27.431	27.407	26.402	26.891	Day
2015-07-11 14:15:00	2015-07-11 14:15:00	27.186	27.333	27.481	27.456	26.402	26.867	Night
2015-07-11 14:30:00	2015-07-11 14:30:00	27.186	27.358	27.53	27.505	26.426	26.842	Night
2015-07-11 14:45:00	2015-07-11 14:45:00	27.21	27.407	27.579	27.554	26.426	26.793	Night
2015-07-11 15:00:00	2015-07-11 15:00:00	27.235	27.431	27.604	27.579	26.402	26.744	Night
2015-07-11 15:15:00	2015-07-11 15:15:00	27.235	27.481	27.628	27.604	26.378	26.769	Night
2015-07-11 15:30:00	2015-07-11 15:30:00	27.259	27.53	27.628	27.604	26.353	26.744	Night
2015-07-11 15:45:00	2015-07-11 15:45:00	27.284	27.579	27.653	27.628	26.402	26.744	Night
2015-07-11 16:00:00	2015-07-11 16:00:00	27.308	27.653	27.653	27.628	26.402	26.744	Night
2015-07-11 16:15:00	2015-07-11 16:15:00	27.308	27.727	27.702	27.677	26.426	26.744	Night
2015-07-11 16:30:00	2015-07-11 16:30:00	27.308	27.801	27.702	27.677	26.426	26.769	Night
2015-07-11 16:45:00	2015-07-11 16:45:00	27.308	27.85	27.677	27.653	26.451	26.769	Night
2015-07-11 17:00:00	2015-07-11 17:00:00	27.333	27.875	27.628	27.628	26.451	26.744	Night
2015-07-11 17:15:00	2015-07-11 17:15:00	27.308	27.875	27.554	27.579	26.451	26.769	Night
2015-07-11 17:30:00	2015-07-11 17:30:00	27.308	27.85	27.505	27.53	26.475	26.769	Night
2015-07-11 17:45:00	2015-07-11 17:45:00	27.308	27.825	27.431	27.481	26.402	26.793	Night
2015-07-11 18:00:00	2015-07-11 18:00:00	27.308	27.776	27.382	27.431	26.451	26.769	Night
2015-07-11 18:15:00	2015-07-11 18:15:00	27.308	27.727	27.358	27.407	26.451	26.744	Night
2015-07-11 18:30:00	2015-07-11 18:30:00	27.333	27.702	27.358	27.382	26.475	26.769	Night
2015-07-11 18:45:00	2015-07-11 18:45:00	27.308	27.653	27.333	27.358	26.5	26.769	Night
2015-07-11 19:00:00	2015-07-11 19:00:00	27.308	27.604	27.333	27.333	26.5	26.72	Night
2015-07-11 19:15:00	2015-07-11 19:15:00	27.284	27.579	27.284	27.333	26.402	26.671	Night
2015-07-11 19:30:00	2015-07-11 19:30:00	27.259	27.53	27.259	27.284	26.353	26.646	Night
2015-07-11 19:45:00	2015-07-11 19:45:00	27.235	27.505	27.21	27.259	26.329	26.622	Night
2015-07-11 20:00:00	2015-07-11 20:00:00	27.186	27.456	27.161	27.21	26.304	26.622	Night
2015-07-11 20:15:00	2015-07-11 20:15:00	27.161	27.431	27.136	27.161	26.28	26.598	Night
2015-07-11 20:30:00	2015-07-11 20:30:00	27.112	27.382	27.087	27.136	26.158	26.573	Night
2015-07-11 20:45:00	2015-07-11 20:45:00	27.063	27.358	27.038	27.087	26.085	26.549	Night
2015-07-11 21:00:00	2015-07-11 21:00:00	27.014	27.308	27.014	27.038	26.061	26.549	Night
2015-07-11 21:15:00	2015-07-11 21:15:00	26.989	27.284	26.989	27.014	26.061	26.549	Night
2015-07-11 21:30:00	2015-07-11 21:30:00	26.965	27.235	26.94	26.989	26.061	26.573	Night
2015-07-11 21:45:00	2015-07-11 21:45:00	26.94	27.186	26.916	26.965	26.012	26.598	Night
2015-07-11 22:00:00	2015-07-11 22:00:00	26.916	27.136	26.891	26.94	25.987	26.573	Night
2015-07-11 22:15:00	2015-07-11 22:15:00	26.916	27.087	26.867	26.891	25.987	26.622	Night
2015-07-11 22:30:00	2015-07-11 22:30:00	26.891	27.038	26.842	26.867	25.987	26.646	Night
2015-07-11 22:45:00	2015-07-11 22:45:00	26.867	26.989	26.818	26.842	26.012	26.646	Night
2015-07-11 23:00:00	2015-07-11 23:00:00	26.842	26.965	26.793	26.818	26.036	26.622	Night
2015-07-11 23:15:00	2015-07-11 23:15:00	26.818	26.94	26.769	26.793	26.012	26.646	Night
2015-07-11 23:30:00	2015-07-11 23:30:00	26.793	26.891	26.769	26.793	26.012	26.573	Night
2015-07-11 23:45:00	2015-07-11 23:45:00	26.769	26.891	26.744	26.769	26.036	26.5	Night
2015-07-12	2015-07-12	26.744	26.842	26.744	26.744	26.085	26.475	Night
2015-07-12 00:15:00	2015-07-12 00:15:00	26.72	26.842	26.72	26.744	26.134	26.475	Night
2015-07-12 00:30:00	2015-07-12 00:30:00	26.695	26.793	26.72	26.744	26.182	26.5	Night
2015-07-12 00:45:00	2015-07-12 00:45:00	26.695	26.769	26.695	26.72	26.231	26.524	Night
2015-07-12 01:00:00	2015-07-12 01:00:00	26.695	26.744	26.695	26.72	26.304	26.549	Night
2015-07-12 01:15:00	2015-07-12 01:15:00	26.695	26.744	26.695	26.695	26.329	26.598	Night
2015-07-12 01:30:00	2015-07-12 01:30:00	26.695	26.72	26.671	26.695	26.353	26.622	Night
2015-07-12 01:45:00	2015-07-12 01:45:00	26.695	26.695	26.671	26.695	26.353	26.646	Night
2015-07-12 02:00:00	2015-07-12 02:00:00	26.695	26.695	26.646	26.671	26.378	26.671	Night
2015-07-12 02:15:00	2015-07-12 02:15:00	26.695	26.671	26.646	26.671	26.402	26.695	Night
2015-07-12 02:30:00	2015-07-12 02:30:00	26.671	26.646	26.646	26.671	26.402	26.695	Night
2015-07-12 02:45:00	2015-07-12 02:45:00	26.671	26.646	26.622	26.646	26.402	26.671	Night
2015-07-12 03:00:00	2015-07-12 03:00:00	26.646	26.622	26.598	26.646	26.426	26.671	Night
2015-07-12 03:15:00	2015-07-12 03:15:00	26.646	26.622	26.598	26.622	26.426	26.646	Night
2015-07-12 03:30:00	2015-07-12 03:30:00	26.646	26.598	26.573	26.598	26.451	26.646	Night
2015-07-12 03:45:00	2015-07-12 03:45:00	26.646	26.598	26.573	26.598	26.451	26.646	Night
2015-07-12 04:00:00	2015-07-12 04:00:00	26.646	26.573	26.573	26.598	26.451	26.646	Night
2015-07-12 04:15:00	2015-07-12 04:15:00	26.646	26.573	26.549	26.573	26.451	26.622	Night
2015-07-12 04:30:00	2015-07-12 04:30:00	26.622	26.549	26.549	26.573	26.451	26.622	Night
2015-07-12 04:45:00	2015-07-12 04:45:00	26.622	26.549	26.549	26.573	26.451	26.622	Night
2015-07-12 05:00:00	2015-07-12 05:00:00	26.622	26.549	26.549	26.549	26.451	26.622	Night
2015-07-12 05:15:00	2015-07-12 05:15:00	26.622	26.549	26.549	26.549	26.475	26.622	Night
2015-07-12 05:30:00	2015-07-12 05:30:00	26.622	26.549	26.524	26.549	26.475	26.622	Night
2015-07-12 05:45:00	2015-07-12 05:45:00	26.622	26.524	26.549	26.549	26.451	26.598	Night
2015-07-12 06:00:00	2015-07-12 06:00:00	26.622	26.524	26.549	26.549	26.426	26.598	Night
2015-07-12 06:15:00	2015-07-12 06:15:00	26.598	26.524	26.549	26.549	26.426	26.598	Night
2015-07-12 06:30:00	2015-07-12 06:30:00	26.622	26.524	26.549	26.549	26.426	26.598	Night
2015-07-12 06:45:00	2015-07-12 06:45:00	26.622	26.5	26.549	26.573	26.426	26.573	Night
2015-07-12 07:00:00	2015-07-12 07:00:00	26.622	26.5	26.573	26.573	26.451	26.573	Night
2015-07-12 07:15:00	2015-07-12 07:15:00	26.622	26.5	26.573	26.573	26.451	26.573	Night
2015-07-12 07:30:00	2015-07-12 07:30:00	26.622	26.524	26.598	26.598	26.426	26.573	Night
2015-07-12 07:45:00	2015-07-12 07:45:00	26.622	26.549	26.622	26.598	26.402	26.573	Night
2015-07-12 08:00:00	2015-07-12 08:00:00	26.646	26.549	26.671	26.646	26.402	26.598	Night
2015-07-12 08:15:00	2015-07-12 08:15:00	26.646	26.598	26.695	26.671	26.402	26.598	Night
2015-07-12 08:30:00	2015-07-12 08:30:00	26.671	26.646	26.769	26.72	26.402	26.622	Night
2015-07-12 08:45:00	2015-07-12 08:45:00	26.695	26.671	26.818	26.769	26.426	26.622	Night
2015-07-12 09:00:00	2015-07-12 09:00:00	26.744	26.72	26.867	26.818	26.451	26.622	Night
2015-07-12 09:15:00	2015-07-12 09:15:00	26.769	26.769	26.891	26.842	26.451	26.622	Night
2015-07-12 09:30:00	2015-07-12 09:30:00	26.793	26.818	26.916	26.867	26.451	26.622	Night
2015-07-12 09:45:00	2015-07-12 09:45:00	26.818	26.891	26.94	26.891	26.475	26.646	Night
2015-07-12 10:00:00	2015-07-12 10:00:00	26.842	26.965	26.989	26.94	26.329	26.671	Night
2015-07-12 10:15:00	2015-07-12 10:15:00	26.891	27.038	27.038	26.989	26.182	26.671	Night
2015-07-12 10:30:00	2015-07-12 10:30:00	26.916	27.136	27.087	27.038	26.158	26.72	Night
2015-07-12 10:45:00	2015-07-12 10:45:00	26.965	27.235	27.136	27.112	26.182	26.72	Night
2015-07-12 11:00:00	2015-07-12 11:00:00	26.989	27.333	27.235	27.186	26.256	26.72	Day
2015-07-12 11:15:00	2015-07-12 11:15:00	27.038	27.407	27.308	27.284	26.329	26.744	Day
2015-07-12 11:30:00	2015-07-12 11:30:00	27.063	27.505	27.382	27.358	26.353	26.744	Day
2015-07-12 11:45:00	2015-07-12 11:45:00	27.112	27.579	27.456	27.431	26.402	26.744	Day
2015-07-12 12:00:00	2015-07-12 12:00:00	27.186	27.677	27.53	27.505	26.426	26.769	Day
2015-07-12 12:15:00	2015-07-12 12:15:00	27.259	27.727	27.628	27.604	26.426	26.769	Day
2015-07-12 12:30:00	2015-07-12 12:30:00	27.333	27.801	27.727	27.702	26.451	26.769	Day
2015-07-12 12:45:00	2015-07-12 12:45:00	27.431	27.85	27.825	27.776	26.451	26.769	Day
2015-07-12 13:00:00	2015-07-12 13:00:00	27.53	27.924	27.924	27.875	26.451	26.72	Day
2015-07-12 13:15:00	2015-07-12 13:15:00	27.628	27.998	28.023	27.974	26.475	26.671	Day
2015-07-12 13:30:00	2015-07-12 13:30:00	27.727	28.072	28.147	28.072	26.5	26.695	Day
2015-07-12 13:45:00	2015-07-12 13:45:00	27.801	28.171	28.221	28.171	26.549	26.72	Day
2015-07-12 14:00:00	2015-07-12 14:00:00	27.875	28.245	28.32	28.27	26.549	26.744	Day
2015-07-12 14:15:00	2015-07-12 14:15:00	27.949	28.32	28.419	28.369	26.573	26.769	Night
2015-07-12 14:30:00	2015-07-12 14:30:00	28.023	28.419	28.518	28.468	26.573	26.793	Night
2015-07-12 14:45:00	2015-07-12 14:45:00	28.048	28.493	28.593	28.543	26.598	26.818	Night
2015-07-12 15:00:00	2015-07-12 15:00:00	28.072	28.543	28.642	28.593	26.598	26.842	Night
2015-07-12 15:15:00	2015-07-12 15:15:00	28.097	28.617	28.667	28.642	26.426	26.867	Night
2015-07-12 15:30:00	2015-07-12 15:30:00	28.097	28.667	28.717	28.692	26.231	26.891	Night
2015-07-12 15:45:00	2015-07-12 15:45:00	28.097	28.742	28.742	28.717	26.304	26.916	Night
2015-07-12 16:00:00	2015-07-12 16:00:00	28.072	28.791	28.742	28.742	26.402	26.989	Night
2015-07-12 16:15:00	2015-07-12 16:15:00	28.072	28.841	28.742	28.742	26.524	27.063	Night
2015-07-12 16:30:00	2015-07-12 16:30:00	28.048	28.866	28.742	28.742	26.622	27.136	Night
2015-07-12 16:45:00	2015-07-12 16:45:00	28.048	28.866	28.717	28.717	26.695	27.161	Night
2015-07-12 17:00:00	2015-07-12 17:00:00	28.023	28.866	28.692	28.692	26.695	27.161	Night
2015-07-12 17:15:00	2015-07-12 17:15:00	27.998	28.891	28.642	28.667	26.671	27.136	Night
2015-07-12 17:30:00	2015-07-12 17:30:00	27.974	28.916	28.568	28.593	25.817	27.136	Night
2015-07-12 17:45:00	2015-07-12 17:45:00	27.949	28.941	28.493	28.518	25.307	27.112	Night
2015-07-12 18:00:00	2015-07-12 18:00:00	27.949	28.941	28.444	28.468	25.453	27.087	Night
2015-07-12 18:15:00	2015-07-12 18:15:00	27.949	28.941	28.394	28.419	25.768	27.063	Night
2015-07-12 18:30:00	2015-07-12 18:30:00	27.949	28.916	28.32	28.369	26.061	27.038	Night
2015-07-12 18:45:00	2015-07-12 18:45:00	27.949	28.866	28.27	28.32	26.28	27.038	Night
2015-07-12 19:00:00	2015-07-12 19:00:00	27.924	28.816	28.221	28.245	26.426	27.038	Night
2015-07-12 19:15:00	2015-07-12 19:15:00	27.85	28.766	28.147	28.196	26.549	27.038	Night
2015-07-12 19:30:00	2015-07-12 19:30:00	27.801	28.717	28.097	28.147	26.5	27.038	Night
2015-07-12 19:45:00	2015-07-12 19:45:00	27.727	28.667	28.048	28.097	26.5	27.063	Night
2015-07-12 20:00:00	2015-07-12 20:00:00	27.677	28.593	27.998	28.048	26.549	27.063	Night
2015-07-12 20:15:00	2015-07-12 20:15:00	27.677	28.543	27.924	27.974	26.622	27.038	Night
2015-07-12 20:30:00	2015-07-12 20:30:00	27.727	28.468	27.875	27.924	26.695	27.014	Night
2015-07-12 20:45:00	2015-07-12 20:45:00	27.776	28.419	27.85	27.899	26.72	26.989	Night
2015-07-12 21:00:00	2015-07-12 21:00:00	27.825	28.345	27.825	27.875	26.72	26.989	Night
2015-07-12 21:15:00	2015-07-12 21:15:00	27.875	28.295	27.801	27.85	26.72	26.965	Night
2015-07-12 21:30:00	2015-07-12 21:30:00	27.899	28.221	27.801	27.85	26.72	26.965	Night
2015-07-12 21:45:00	2015-07-12 21:45:00	27.875	28.171	27.825	27.85	26.695	26.965	Night
2015-07-12 22:00:00	2015-07-12 22:00:00	27.825	28.097	27.825	27.825	26.598	26.965	Night
2015-07-12 22:15:00	2015-07-12 22:15:00	27.751	28.048	27.801	27.825	26.402	26.965	Night
2015-07-12 22:30:00	2015-07-12 22:30:00	27.677	27.998	27.776	27.801	26.304	26.94	Night
2015-07-12 22:45:00	2015-07-12 22:45:00	27.579	27.924	27.702	27.727	26.353	26.989	Night
2015-07-12 23:00:00	2015-07-12 23:00:00	27.505	27.875	27.628	27.677	26.451	27.063	Night
2015-07-12 23:15:00	2015-07-12 23:15:00	27.431	27.825	27.554	27.604	26.524	27.136	Night
2015-07-12 23:30:00	2015-07-12 23:30:00	27.382	27.801	27.481	27.53	26.304	27.235	Night
2015-07-12 23:45:00	2015-07-12 23:45:00	27.333	27.751	27.431	27.481	25.939	27.161	Night
2015-07-13	2015-07-13	27.284	27.677	27.382	27.407	25.866	26.94	Night
2015-07-13 00:15:00	2015-07-13 00:15:00	27.284	27.628	27.333	27.382	25.866	26.793	Night
2015-07-13 00:30:00	2015-07-13 00:30:00	27.308	27.579	27.333	27.358	25.939	26.72	Night
2015-07-13 00:45:00	2015-07-13 00:45:00	27.333	27.53	27.333	27.358	26.012	26.793	Night
2015-07-13 01:00:00	2015-07-13 01:00:00	27.382	27.481	27.333	27.358	25.987	26.842	Night
2015-07-13 01:15:00	2015-07-13 01:15:00	27.431	27.456	27.358	27.382	25.963	26.769	Night
2015-07-13 01:30:00	2015-07-13 01:30:00	27.431	27.431	27.358	27.382	25.963	26.769	Night
2015-07-13 01:45:00	2015-07-13 01:45:00	27.431	27.407	27.382	27.382	26.061	26.891	Night
2015-07-13 02:00:00	2015-07-13 02:00:00	27.407	27.382	27.382	27.382	26.085	26.94	Night
2015-07-13 02:15:00	2015-07-13 02:15:00	27.382	27.358	27.382	27.407	26.085	26.94	Night
2015-07-13 02:30:00	2015-07-13 02:30:00	27.333	27.333	27.382	27.407	26.158	26.94	Night
2015-07-13 02:45:00	2015-07-13 02:45:00	27.308	27.333	27.382	27.382	26.158	26.94	Night
2015-07-13 03:00:00	2015-07-13 03:00:00	27.259	27.308	27.358	27.382	26.182	26.94	Night
2015-07-13 03:15:00	2015-07-13 03:15:00	27.235	27.284	27.333	27.358	26.231	26.94	Night
2015-07-13 03:30:00	2015-07-13 03:30:00	27.21	27.284	27.308	27.333	26.28	26.916	Night
2015-07-13 03:45:00	2015-07-13 03:45:00	27.186	27.259	27.284	27.308	26.329	26.94	Night
2015-07-13 04:00:00	2015-07-13 04:00:00	27.161	27.259	27.235	27.284	26.353	26.891	Night
2015-07-13 04:15:00	2015-07-13 04:15:00	27.136	27.235	27.21	27.235	26.378	26.744	Night
2015-07-13 04:30:00	2015-07-13 04:30:00	27.136	27.235	27.186	27.235	26.426	26.744	Night
2015-07-13 04:45:00	2015-07-13 04:45:00	27.136	27.21	27.161	27.186	26.426	26.72	Night
2015-07-13 05:00:00	2015-07-13 05:00:00	27.112	27.186	27.136	27.186	26.451	26.744	Night
2015-07-13 05:15:00	2015-07-13 05:15:00	27.112	27.186	27.112	27.161	26.475	26.793	Night
2015-07-13 05:30:00	2015-07-13 05:30:00	27.087	27.161	27.087	27.136	26.5	26.818	Night
2015-07-13 05:45:00	2015-07-13 05:45:00	27.087	27.136	27.063	27.112	26.5	26.842	Night
2015-07-13 06:00:00	2015-07-13 06:00:00	27.063	27.136	27.038	27.087	26.475	26.867	Night
2015-07-13 06:15:00	2015-07-13 06:15:00	27.038	27.112	27.014	27.038	26.451	26.891	Night
2015-07-13 06:30:00	2015-07-13 06:30:00	27.038	27.087	26.989	27.014	26.426	26.891	Night
2015-07-13 06:45:00	2015-07-13 06:45:00	27.014	27.087	26.965	26.989	26.426	26.891	Night
2015-07-13 07:00:00	2015-07-13 07:00:00	26.989	27.063	26.94	26.965	26.451	26.867	Night
2015-07-13 07:15:00	2015-07-13 07:15:00	26.965	27.063	26.916	26.94	26.426	26.842	Night
2015-07-13 07:30:00	2015-07-13 07:30:00	26.94	27.038	26.891	26.94	26.378	26.818	Night
2015-07-13 07:45:00	2015-07-13 07:45:00	26.94	27.038	26.891	26.916	26.378	26.793	Night
2015-07-13 08:00:00	2015-07-13 08:00:00	26.916	27.014	26.891	26.916	26.353	26.793	Night
2015-07-13 08:15:00	2015-07-13 08:15:00	26.916	27.014	26.891	26.916	26.353	26.793	Night
2015-07-13 08:30:00	2015-07-13 08:30:00	26.916	27.014	26.916	26.916	26.353	26.793	Night
2015-07-13 08:45:00	2015-07-13 08:45:00	26.891	26.989	26.916	26.94	26.28	26.769	Night
2015-07-13 09:00:00	2015-07-13 09:00:00	26.916	26.989	26.94	26.94	26.231	26.769	Night
2015-07-13 09:15:00	2015-07-13 09:15:00	26.916	26.989	26.94	26.94	26.207	26.769	Night
2015-07-13 09:30:00	2015-07-13 09:30:00	26.916	26.989	26.94	26.94	26.182	26.769	Night
2015-07-13 09:45:00	2015-07-13 09:45:00	26.916	26.989	26.965	26.965	26.134	26.744	Night
2015-07-13 10:00:00	2015-07-13 10:00:00	26.94	26.989	26.989	26.965	26.109	26.744	Night
2015-07-13 10:15:00	2015-07-13 10:15:00	26.94	26.989	26.989	26.989	26.134	26.744	Night
2015-07-13 10:30:00	2015-07-13 10:30:00	26.94	27.014	27.014	26.989	26.158	26.769	Night
2015-07-13 10:45:00	2015-07-13 10:45:00	26.94	27.038	27.014	27.014	26.207	26.769	Night
2015-07-13 11:00:00	2015-07-13 11:00:00	26.94	27.038	27.038	27.038	26.256	26.793	Day
2015-07-13 11:15:00	2015-07-13 11:15:00	26.94	27.063	27.063	27.038	26.28	26.793	Day
2015-07-13 11:30:00	2015-07-13 11:30:00	26.94	27.087	27.063	27.063	26.329	26.769	Day
2015-07-13 11:45:00	2015-07-13 11:45:00	26.965	27.112	27.087	27.087	26.402	26.744	Day
2015-07-13 12:00:00	2015-07-13 12:00:00	26.965	27.136	27.087	27.087	26.402	26.744	Day
2015-07-13 12:15:00	2015-07-13 12:15:00	26.965	27.186	27.136	27.112	26.353	26.769	Day
2015-07-13 12:30:00	2015-07-13 12:30:00	26.989	27.235	27.186	27.161	26.256	26.793	Day
2015-07-13 12:45:00	2015-07-13 12:45:00	27.014	27.284	27.21	27.21	26.182	26.818	Day
2015-07-13 13:00:00	2015-07-13 13:00:00	27.038	27.358	27.284	27.259	26.134	26.842	Day
2015-07-13 13:15:00	2015-07-13 13:15:00	27.087	27.407	27.382	27.358	26.109	26.867	Day
2015-07-13 13:30:00	2015-07-13 13:30:00	27.161	27.456	27.456	27.431	26.085	26.916	Day
2015-07-13 13:45:00	2015-07-13 13:45:00	27.21	27.505	27.53	27.505	26.109	26.94	Day
2015-07-13 14:00:00	2015-07-13 14:00:00	27.259	27.554	27.604	27.579	26.134	26.916	Day
2015-07-13 14:15:00	2015-07-13 14:15:00	27.333	27.579	27.677	27.653	26.158	26.744	Night
2015-07-13 14:30:00	2015-07-13 14:30:00	27.382	27.628	27.801	27.751	26.207	26.646	Night
2015-07-13 14:45:00	2015-07-13 14:45:00	27.407	27.677	27.924	27.899	26.256	26.622	Night
2015-07-13 15:00:00	2015-07-13 15:00:00	27.431	27.677	28.048	28.023	26.256	26.573	Night
2015-07-13 15:15:00	2015-07-13 15:15:00	27.456	27.677	28.122	28.122	26.28	26.573	Night
2015-07-13 15:30:00	2015-07-13 15:30:00	27.481	27.677	28.171	28.147	26.28	26.622	Night
2015-07-13 15:45:00	2015-07-13 15:45:00	27.481	27.677	28.147	28.147	26.28	26.598	Night
2015-07-13 16:00:00	2015-07-13 16:00:00	27.481	27.653	28.048	28.072	26.28	26.549	Night
2015-07-13 16:15:00	2015-07-13 16:15:00	27.481	27.653	27.974	27.998	26.28	26.5	Night
2015-07-13 16:30:00	2015-07-13 16:30:00	27.481	27.628	27.974	27.998	26.28	26.475	Night
2015-07-13 16:45:00	2015-07-13 16:45:00	27.456	27.628	27.998	28.023	26.28	26.475	Night
2015-07-13 17:00:00	2015-07-13 17:00:00	27.431	27.604	27.974	27.998	26.304	26.5	Night
2015-07-13 17:15:00	2015-07-13 17:15:00	27.382	27.579	27.924	27.974	26.329	26.549	Night
2015-07-13 17:30:00	2015-07-13 17:30:00	27.333	27.554	27.85	27.875	26.353	26.549	Night
2015-07-13 17:45:00	2015-07-13 17:45:00	27.284	27.53	27.727	27.776	26.353	26.622	Night
2015-07-13 18:00:00	2015-07-13 18:00:00	27.235	27.481	27.604	27.653	26.353	26.744	Night
2015-07-13 18:15:00	2015-07-13 18:15:00	27.186	27.431	27.456	27.53	26.329	26.842	Night
2015-07-13 18:30:00	2015-07-13 18:30:00	27.136	27.358	27.333	27.382	26.329	26.818	Night
2015-07-13 18:45:00	2015-07-13 18:45:00	27.112	27.308	27.21	27.259	26.353	26.695	Night
2015-07-13 19:00:00	2015-07-13 19:00:00	27.087	27.259	27.112	27.161	26.378	26.744	Night
2015-07-13 19:15:00	2015-07-13 19:15:00	27.038	27.21	27.038	27.087	26.378	26.695	Night
2015-07-13 19:30:00	2015-07-13 19:30:00	26.989	27.161	26.94	27.014	26.378	26.793	Night
2015-07-13 19:45:00	2015-07-13 19:45:00	26.965	27.112	26.891	26.94	26.378	26.646	Night
2015-07-13 20:00:00	2015-07-13 20:00:00	26.916	27.063	26.818	26.867	26.378	26.622	Night
2015-07-13 20:15:00	2015-07-13 20:15:00	26.891	27.014	26.769	26.818	26.378	26.598	Night
2015-07-13 20:30:00	2015-07-13 20:30:00	26.842	26.965	26.72	26.769	26.378	26.598	Night
2015-07-13 20:45:00	2015-07-13 20:45:00	26.842	26.916	26.695	26.744	26.378	26.671	Night
2015-07-13 21:00:00	2015-07-13 21:00:00	26.842	26.867	26.671	26.72	26.402	26.646	Night
2015-07-13 21:15:00	2015-07-13 21:15:00	26.818	26.842	26.671	26.695	26.402	26.646	Night
2015-07-13 21:30:00	2015-07-13 21:30:00	26.818	26.793	26.671	26.695	26.426	26.646	Night
2015-07-13 21:45:00	2015-07-13 21:45:00	26.818	26.744	26.695	26.695	26.426	26.622	Night
2015-07-13 22:00:00	2015-07-13 22:00:00	26.793	26.695	26.695	26.695	26.426	26.598	Night
2015-07-13 22:15:00	2015-07-13 22:15:00	26.793	26.671	26.671	26.695	26.426	26.598	Night
2015-07-13 22:30:00	2015-07-13 22:30:00	26.769	26.646	26.671	26.695	26.426	26.646	Night
2015-07-13 22:45:00	2015-07-13 22:45:00	26.744	26.622	26.646	26.671	26.451	26.671	Night
2015-07-13 23:00:00	2015-07-13 23:00:00	26.695	26.598	26.646	26.671	26.451	26.671	Night
2015-07-13 23:15:00	2015-07-13 23:15:00	26.671	26.573	26.622	26.646	26.451	26.671	Night
2015-07-13 23:30:00	2015-07-13 23:30:00	26.646	26.549	26.598	26.622	26.451	26.646	Night
2015-07-13 23:45:00	2015-07-13 23:45:00	26.646	26.524	26.573	26.598	26.451	26.646	Night
2015-07-14	2015-07-14	26.622	26.5	26.549	26.598	26.426	26.622	Night
2015-07-14 00:15:00	2015-07-14 00:15:00	26.598	26.5	26.549	26.573	26.402	26.598	Night
2015-07-14 00:30:00	2015-07-14 00:30:00	26.598	26.475	26.549	26.549	26.402	26.573	Night
2015-07-14 00:45:00	2015-07-14 00:45:00	26.573	26.451	26.524	26.549	26.402	26.549	Night
2015-07-14 01:00:00	2015-07-14 01:00:00	26.573	26.451	26.524	26.549	26.426	26.549	Night
2015-07-14 01:15:00	2015-07-14 01:15:00	26.549	26.451	26.5	26.549	26.426	26.524	Night
2015-07-14 01:30:00	2015-07-14 01:30:00	26.549	26.426	26.5	26.524	26.426	26.524	Night
2015-07-14 01:45:00	2015-07-14 01:45:00	26.549	26.402	26.5	26.5	26.451	26.5	Night
2015-07-14 02:00:00	2015-07-14 02:00:00	26.524	26.402	26.475	26.5	26.451	26.5	Night
2015-07-14 02:15:00	2015-07-14 02:15:00	26.5	26.378	26.475	26.5	26.451	26.5	Night
2015-07-14 02:30:00	2015-07-14 02:30:00	26.5	26.353	26.451	26.475	26.475	26.5	Night
2015-07-14 02:45:00	2015-07-14 02:45:00	26.5	26.353	26.451	26.451	26.475	26.5	Night
2015-07-14 03:00:00	2015-07-14 03:00:00	26.475	26.329	26.426	26.451	26.451	26.475	Night
2015-07-14 03:15:00	2015-07-14 03:15:00	26.475	26.304	26.402	26.426	26.426	26.451	Night
2015-07-14 03:30:00	2015-07-14 03:30:00	26.451	26.304	26.378	26.402	26.402	26.451	Night
2015-07-14 03:45:00	2015-07-14 03:45:00	26.451	26.304	26.378	26.402	26.402	26.426	Night
2015-07-14 04:00:00	2015-07-14 04:00:00	26.451	26.304	26.353	26.378	26.402	26.426	Night
2015-07-14 04:15:00	2015-07-14 04:15:00	26.426	26.304	26.353	26.378	26.402	26.402	Night
2015-07-14 04:30:00	2015-07-14 04:30:00	26.426	26.28	26.353	26.378	26.402	26.402	Night
2015-07-14 04:45:00	2015-07-14 04:45:00	26.426	26.28	26.353	26.353	26.402	26.402	Night
2015-07-14 05:00:00	2015-07-14 05:00:00	26.402	26.28	26.353	26.353	26.378	26.378	Night
2015-07-14 05:15:00	2015-07-14 05:15:00	26.402	26.256	26.329	26.353	26.378	26.378	Night
2015-07-14 05:30:00	2015-07-14 05:30:00	26.402	26.256	26.329	26.353	26.353	26.402	Night
2015-07-14 05:45:00	2015-07-14 05:45:00	26.402	26.231	26.304	26.329	26.329	26.402	Night
2015-07-14 06:00:00	2015-07-14 06:00:00	26.378	26.207	26.304	26.304	26.329	26.402	Night
2015-07-14 06:15:00	2015-07-14 06:15:00	26.378	26.207	26.28	26.304	26.304	26.402	Night
2015-07-14 06:30:00	2015-07-14 06:30:00	26.378	26.182	26.28	26.304	26.28	26.378	Night
2015-07-14 06:45:00	2015-07-14 06:45:00	26.353	26.158	26.256	26.28	26.28	26.378	Night
2015-07-14 07:00:00	2015-07-14 07:00:00	26.353	26.158	26.256	26.28	26.28	26.378	Night
2015-07-14 07:15:00	2015-07-14 07:15:00	26.353	26.158	26.256	26.28	26.28	26.353	Night
2015-07-14 07:30:00	2015-07-14 07:30:00	26.353	26.134	26.256	26.28	26.28	26.329	Night
2015-07-14 07:45:00	2015-07-14 07:45:00	26.353	26.134	26.28	26.28	26.28	26.329	Night
2015-07-14 08:00:00	2015-07-14 08:00:00	26.353	26.134	26.304	26.28	26.28	26.304	Night
2015-07-14 08:15:00	2015-07-14 08:15:00	26.353	26.158	26.329	26.28	26.304	26.304	Night
2015-07-14 08:30:00	2015-07-14 08:30:00	26.353	26.158	26.402	26.304	26.304	26.329	Night
2015-07-14 08:45:00	2015-07-14 08:45:00	26.353	26.182	26.451	26.353	26.304	26.329	Night
2015-07-14 09:00:00	2015-07-14 09:00:00	26.378	26.182	26.5	26.402	26.329	26.329	Night
2015-07-14 09:15:00	2015-07-14 09:15:00	26.402	26.207	26.549	26.451	26.329	26.353	Night
2015-07-14 09:30:00	2015-07-14 09:30:00	26.402	26.256	26.573	26.5	26.353	26.402	Night
2015-07-14 09:45:00	2015-07-14 09:45:00	26.451	26.28	26.646	26.549	26.353	26.402	Night
2015-07-14 10:00:00	2015-07-14 10:00:00	26.475	26.353	26.72	26.622	26.378	26.451	Night
2015-07-14 10:15:00	2015-07-14 10:15:00	26.5	26.426	26.793	26.695	26.402	26.475	Night
2015-07-14 10:30:00	2015-07-14 10:30:00	26.549	26.524	26.867	26.769	26.426	26.524	Night
2015-07-14 10:45:00	2015-07-14 10:45:00	26.598	26.622	26.916	26.842	26.451	26.549	Night
2015-07-14 11:00:00	2015-07-14 11:00:00	26.646	26.72	26.94	26.867	26.475	26.573	Day
2015-07-14 11:15:00	2015-07-14 11:15:00	26.695	26.818	26.94	26.891	26.524	26.598	Day
2015-07-14 11:30:00	2015-07-14 11:30:00	26.72	26.891	26.94	26.891	26.549	26.622	Day
2015-07-14 11:45:00	2015-07-14 11:45:00	26.72	26.94	26.916	26.891	26.573	26.622	Day
2015-07-14 12:00:00	2015-07-14 12:00:00	26.744	27.014	26.891	26.891	26.598	26.646	Day
2015-07-14 12:15:00	2015-07-14 12:15:00	26.769	27.063	26.916	26.891	26.622	26.695	Day
2015-07-14 12:30:00	2015-07-14 12:30:00	26.818	27.136	26.94	26.916	26.646	26.744	Day
2015-07-14 12:45:00	2015-07-14 12:45:00	26.867	27.186	26.989	26.94	26.671	26.793	Day
2015-07-14 13:00:00	2015-07-14 13:00:00	26.916	27.259	27.038	26.989	26.695	26.818	Day
2015-07-14 13:15:00	2015-07-14 13:15:00	26.965	27.333	27.087	27.038	26.72	26.891	Day
2015-07-14 13:30:00	2015-07-14 13:30:00	26.989	27.382	27.136	27.087	26.671	26.916	Day
2015-07-14 13:45:00	2015-07-14 13:45:00	27.038	27.431	27.186	27.136	26.475	26.94	Day
2015-07-14 14:00:00	2015-07-14 14:00:00	27.063	27.481	27.259	27.235	26.451	26.891	Day
2015-07-14 14:15:00	2015-07-14 14:15:00	27.112	27.53	27.333	27.333	26.402	26.867	Night
2015-07-14 14:30:00	2015-07-14 14:30:00	27.136	27.53	27.407	27.382	26.426	26.867	Night
2015-07-14 14:45:00	2015-07-14 14:45:00	27.186	27.53	27.481	27.456	26.5	26.867	Night
2015-07-14 15:00:00	2015-07-14 15:00:00	27.235	27.554	27.53	27.53	26.573	26.867	Night
2015-07-14 15:15:00	2015-07-14 15:15:00	27.259	27.554	27.628	27.628	26.646	26.891	Night
2015-07-14 15:30:00	2015-07-14 15:30:00	27.284	27.554	27.751	27.727	26.695	26.891	Night
2015-07-14 15:45:00	2015-07-14 15:45:00	27.333	27.554	27.825	27.825	26.744	26.891	Night
2015-07-14 16:00:00	2015-07-14 16:00:00	27.333	27.579	27.899	27.875	26.793	26.891	Night
2015-07-14 16:15:00	2015-07-14 16:15:00	27.358	27.579	27.924	27.924	26.793	26.916	Night
2015-07-14 16:30:00	2015-07-14 16:30:00	27.358	27.579	27.974	27.974	26.793	26.94	Night
2015-07-14 16:45:00	2015-07-14 16:45:00	27.382	27.554	27.974	27.974	26.793	26.965	Night
2015-07-14 17:00:00	2015-07-14 17:00:00	27.382	27.53	27.998	27.998	26.818	27.014	Night
2015-07-14 17:15:00	2015-07-14 17:15:00	27.382	27.53	27.998	27.998	26.818	27.014	Night
2015-07-14 17:30:00	2015-07-14 17:30:00	27.382	27.505	27.924	27.924	26.769	27.063	Night
2015-07-14 17:45:00	2015-07-14 17:45:00	27.382	27.481	27.875	27.875	26.744	27.063	Night
2015-07-14 18:00:00	2015-07-14 18:00:00	27.358	27.431	27.825	27.825	26.744	27.038	Night
2015-07-14 18:15:00	2015-07-14 18:15:00	27.333	27.407	27.776	27.776	26.769	27.014	Night
2015-07-14 18:30:00	2015-07-14 18:30:00	27.308	27.382	27.702	27.702	26.793	27.014	Night
2015-07-14 18:45:00	2015-07-14 18:45:00	27.284	27.358	27.653	27.653	26.842	27.063	Night
2015-07-14 19:00:00	2015-07-14 19:00:00	27.259	27.333	27.579	27.579	26.867	27.087	Night
2015-07-14 19:15:00	2015-07-14 19:15:00	27.235	27.333	27.481	27.505	26.891	27.063	Night
2015-07-14 19:30:00	2015-07-14 19:30:00	27.186	27.284	27.358	27.407	26.916	27.112	Night
2015-07-14 19:45:00	2015-07-14 19:45:00	27.161	27.259	27.259	27.333	26.94	27.087	Night
2015-07-14 20:00:00	2015-07-14 20:00:00	27.136	27.21	27.186	27.235	26.891	27.112	Night
2015-07-14 20:15:00	2015-07-14 20:15:00	27.112	27.186	27.112	27.186	26.842	27.038	Night
2015-07-14 20:30:00	2015-07-14 20:30:00	27.087	27.161	27.063	27.112	26.818	26.989	Night
2015-07-14 20:45:00	2015-07-14 20:45:00	27.063	27.112	27.014	27.063	26.842	26.989	Night
2015-07-14 21:00:00	2015-07-14 21:00:00	27.038	27.087	26.965	27.014	26.842	27.014	Night
2015-07-14 21:15:00	2015-07-14 21:15:00	27.014	27.038	26.94	26.989	26.793	26.989	Night
2015-07-14 21:30:00	2015-07-14 21:30:00	26.989	27.014	26.916	26.965	26.72	26.965	Night
2015-07-14 21:45:00	2015-07-14 21:45:00	26.989	26.989	26.891	26.94	26.695	26.989	Night
2015-07-14 22:00:00	2015-07-14 22:00:00	26.965	26.965	26.867	26.916	26.695	26.989	Night
2015-07-14 22:15:00	2015-07-14 22:15:00	26.965	26.94	26.867	26.891	26.695	26.965	Night
2015-07-14 22:30:00	2015-07-14 22:30:00	26.94	26.916	26.842	26.891	26.695	26.94	Night
2015-07-14 22:45:00	2015-07-14 22:45:00	26.94	26.891	26.842	26.867	26.695	26.94	Night
2015-07-14 23:00:00	2015-07-14 23:00:00	26.94	26.867	26.842	26.867	26.695	26.916	Night
2015-07-14 23:15:00	2015-07-14 23:15:00	26.94	26.842	26.842	26.867	26.695	26.916	Night
2015-07-14 23:30:00	2015-07-14 23:30:00	26.94	26.842	26.842	26.867	26.646	26.916	Night
2015-07-14 23:45:00	2015-07-14 23:45:00	26.94	26.818	26.842	26.867	26.646	26.916	Night
2015-07-15	2015-07-15	26.94	26.793	26.842	26.867	26.598	26.916	Night
2015-07-15 00:15:00	2015-07-15 00:15:00	26.94	26.793	26.842	26.867	26.598	26.891	Night
2015-07-15 00:30:00	2015-07-15 00:30:00	26.916	26.769	26.842	26.867	26.573	26.891	Night
2015-07-15 00:45:00	2015-07-15 00:45:00	26.916	26.744	26.842	26.842	26.549	26.867	Night
2015-07-15 01:00:00	2015-07-15 01:00:00	26.916	26.744	26.818	26.842	26.475	26.867	Night
2015-07-15 01:15:00	2015-07-15 01:15:00	26.891	26.72	26.818	26.842	26.475	26.842	Night
2015-07-15 01:30:00	2015-07-15 01:30:00	26.891	26.72	26.818	26.842	26.475	26.842	Night
2015-07-15 01:45:00	2015-07-15 01:45:00	26.891	26.695	26.818	26.842	26.475	26.793	Night
2015-07-15 02:00:00	2015-07-15 02:00:00	26.867	26.695	26.818	26.842	26.5	26.793	Night
2015-07-15 02:15:00	2015-07-15 02:15:00	26.867	26.671	26.818	26.842	26.524	26.744	Night
2015-07-15 02:30:00	2015-07-15 02:30:00	26.867	26.671	26.818	26.818	26.549	26.72	Night
2015-07-15 02:45:00	2015-07-15 02:45:00	26.867	26.671	26.793	26.818	26.549	26.72	Night
2015-07-15 03:00:00	2015-07-15 03:00:00	26.842	26.646	26.793	26.818	26.549	26.72	Night
2015-07-15 03:15:00	2015-07-15 03:15:00	26.842	26.646	26.793	26.818	26.549	26.695	Night
2015-07-15 03:30:00	2015-07-15 03:30:00	26.842	26.646	26.793	26.818	26.549	26.695	Night
2015-07-15 03:45:00	2015-07-15 03:45:00	26.818	26.646	26.769	26.793	26.5	26.671	Night
2015-07-15 04:00:00	2015-07-15 04:00:00	26.818	26.622	26.769	26.793	26.451	26.671	Night
2015-07-15 04:15:00	2015-07-15 04:15:00	26.793	26.622	26.744	26.769	26.451	26.646	Night
2015-07-15 04:30:00	2015-07-15 04:30:00	26.769	26.622	26.744	26.769	26.451	26.622	Night
2015-07-15 04:45:00	2015-07-15 04:45:00	26.769	26.598	26.72	26.744	26.475	26.622	Night
2015-07-15 05:00:00	2015-07-15 05:00:00	26.744	26.598	26.72	26.744	26.5	26.598	Night
2015-07-15 05:15:00	2015-07-15 05:15:00	26.744	26.573	26.695	26.72	26.5	26.598	Night
2015-07-15 05:30:00	2015-07-15 05:30:00	26.72	26.549	26.671	26.695	26.451	26.573	Night
2015-07-15 05:45:00	2015-07-15 05:45:00	26.695	26.549	26.646	26.671	26.451	26.573	Night
2015-07-15 06:00:00	2015-07-15 06:00:00	26.695	26.524	26.598	26.646	26.329	26.549	Night
2015-07-15 06:15:00	2015-07-15 06:15:00	26.671	26.5	26.573	26.622	26.207	26.549	Night
2015-07-15 06:30:00	2015-07-15 06:30:00	26.671	26.475	26.549	26.598	26.158	26.524	Night
2015-07-15 06:45:00	2015-07-15 06:45:00	26.646	26.451	26.524	26.573	26.158	26.5	Night
2015-07-15 07:00:00	2015-07-15 07:00:00	26.646	26.451	26.524	26.549	26.158	26.5	Night
2015-07-15 07:15:00	2015-07-15 07:15:00	26.622	26.451	26.524	26.549	26.182	26.5	Night
2015-07-15 07:30:00	2015-07-15 07:30:00	26.622	26.451	26.549	26.549	26.182	26.5	Night
2015-07-15 07:45:00	2015-07-15 07:45:00	26.622	26.451	26.598	26.549	26.207	26.5	Night
2015-07-15 08:00:00	2015-07-15 08:00:00	26.622	26.451	26.646	26.573	26.231	26.524	Night
2015-07-15 08:15:00	2015-07-15 08:15:00	26.622	26.475	26.72	26.622	26.231	26.524	Night
2015-07-15 08:30:00	2015-07-15 08:30:00	26.646	26.5	26.818	26.671	26.256	26.549	Night
2015-07-15 08:45:00	2015-07-15 08:45:00	26.671	26.524	26.916	26.744	26.28	26.549	Night
2015-07-15 09:00:00	2015-07-15 09:00:00	26.695	26.573	27.014	26.818	26.329	26.549	Night
2015-07-15 09:15:00	2015-07-15 09:15:00	26.744	26.622	27.136	26.916	26.353	26.573	Night
2015-07-15 09:30:00	2015-07-15 09:30:00	26.793	26.671	27.259	27.014	26.402	26.598	Night
2015-07-15 09:45:00	2015-07-15 09:45:00	26.842	26.744	27.333	27.112	26.402	26.622	Night
2015-07-15 10:00:00	2015-07-15 10:00:00	26.891	26.818	27.407	27.21	26.426	26.646	Night
2015-07-15 10:15:00	2015-07-15 10:15:00	26.94	26.891	27.431	27.284	26.451	26.671	Night
2015-07-15 10:30:00	2015-07-15 10:30:00	27.014	26.989	27.456	27.333	26.475	26.695	Night
2015-07-15 10:45:00	2015-07-15 10:45:00	27.063	27.112	27.481	27.407	26.5	26.744	Night
2015-07-15 11:00:00	2015-07-15 11:00:00	27.112	27.21	27.505	27.431	26.549	26.769	Day
2015-07-15 11:15:00	2015-07-15 11:15:00	27.136	27.333	27.505	27.456	26.573	26.793	Day
2015-07-15 11:30:00	2015-07-15 11:30:00	27.186	27.431	27.53	27.481	26.622	26.842	Day
2015-07-15 11:45:00	2015-07-15 11:45:00	27.21	27.53	27.505	27.481	26.671	26.891	Day
2015-07-15 12:00:00	2015-07-15 12:00:00	27.235	27.604	27.505	27.456	26.72	26.94	Day
2015-07-15 12:15:00	2015-07-15 12:15:00	27.259	27.702	27.481	27.456	26.744	26.989	Day
2015-07-15 12:30:00	2015-07-15 12:30:00	27.284	27.776	27.505	27.456	26.72	27.063	Day
2015-07-15 12:45:00	2015-07-15 12:45:00	27.333	27.825	27.505	27.481	26.646	27.112	Day
2015-07-15 13:00:00	2015-07-15 13:00:00	27.358	27.875	27.53	27.481	26.646	27.136	Day
2015-07-15 13:15:00	2015-07-15 13:15:00	27.382	27.924	27.554	27.505	26.646	27.161	Day
2015-07-15 13:30:00	2015-07-15 13:30:00	27.407	27.974	27.579	27.53	26.671	27.186	Day
2015-07-15 13:45:00	2015-07-15 13:45:00	27.456	27.998	27.628	27.579	26.671	27.161	Day
2015-07-15 14:00:00	2015-07-15 14:00:00	27.481	28.023	27.677	27.653	26.378	27.112	Day
2015-07-15 14:15:00	2015-07-15 14:15:00	27.53	28.072	27.727	27.727	26.231	27.087	Night
2015-07-15 14:30:00	2015-07-15 14:30:00	27.579	28.097	27.801	27.776	26.304	27.038	Night
2015-07-15 14:45:00	2015-07-15 14:45:00	27.628	28.122	27.85	27.85	26.426	27.014	Night
2015-07-15 15:00:00	2015-07-15 15:00:00	27.653	28.122	27.924	27.899	26.5	27.014	Night
2015-07-15 15:15:00	2015-07-15 15:15:00	27.677	28.097	27.949	27.949	26.573	27.014	Night
2015-07-15 15:30:00	2015-07-15 15:30:00	27.677	28.048	27.974	27.974	26.524	27.038	Night
2015-07-15 15:45:00	2015-07-15 15:45:00	27.702	28.023	27.998	27.998	26.426	27.038	Night
2015-07-15 16:00:00	2015-07-15 16:00:00	27.727	28.023	28.023	28.048	25.963	26.94	Night
2015-07-15 16:15:00	2015-07-15 16:15:00	27.727	27.998	28.097	28.122	25.768	26.867	Night
2015-07-15 16:30:00	2015-07-15 16:30:00	27.751	27.974	28.171	28.171	25.744	26.72	Night
2015-07-15 16:45:00	2015-07-15 16:45:00	27.776	27.949	28.221	28.221	25.89	26.695	Night
2015-07-15 17:00:00	2015-07-15 17:00:00	27.751	27.949	28.221	28.245	26.061	26.671	Night
2015-07-15 17:15:00	2015-07-15 17:15:00	27.727	27.924	28.245	28.27	26.231	26.671	Night
2015-07-15 17:30:00	2015-07-15 17:30:00	27.702	27.899	28.27	28.295	26.329	26.695	Night
2015-07-15 17:45:00	2015-07-15 17:45:00	27.677	27.875	28.27	28.295	26.353	26.695	Night
2015-07-15 18:00:00	2015-07-15 18:00:00	27.653	27.85	28.27	28.295	26.402	26.744	Night
2015-07-15 18:15:00	2015-07-15 18:15:00	27.628	27.825	28.27	28.27	26.402	26.769	Night
2015-07-15 18:30:00	2015-07-15 18:30:00	27.579	27.776	28.245	28.245	26.451	26.818	Night
2015-07-15 18:45:00	2015-07-15 18:45:00	27.53	27.727	28.196	28.196	26.475	26.891	Night
2015-07-15 19:00:00	2015-07-15 19:00:00	27.481	27.702	28.122	28.122	26.5	26.94	Night
2015-07-15 19:15:00	2015-07-15 19:15:00	27.407	27.677	28.048	28.023	26.524	26.916	Night
2015-07-15 19:30:00	2015-07-15 19:30:00	27.333	27.677	27.949	27.924	26.549	26.842	Night
2015-07-15 19:45:00	2015-07-15 19:45:00	27.259	27.702	27.85	27.801	26.549	26.793	Night
2015-07-15 20:00:00	2015-07-15 20:00:00	27.186	27.702	27.727	27.677	26.451	26.793	Night
2015-07-15 20:15:00	2015-07-15 20:15:00	27.161	27.677	27.604	27.554	25.987	26.818	Night
2015-07-15 20:30:00	2015-07-15 20:30:00	27.112	27.628	27.481	27.431	26.158	26.818	Night
2015-07-15 20:45:00	2015-07-15 20:45:00	27.087	27.554	27.358	27.333	26.256	26.818	Night
2015-07-15 21:00:00	2015-07-15 21:00:00	27.063	27.481	27.235	27.235	26.353	26.818	Night
2015-07-15 21:15:00	2015-07-15 21:15:00	27.063	27.431	27.161	27.136	26.402	26.818	Night
2015-07-15 21:30:00	2015-07-15 21:30:00	27.038	27.358	27.087	27.087	26.5	26.793	Night
2015-07-15 21:45:00	2015-07-15 21:45:00	27.038	27.308	27.038	27.014	26.549	26.793	Night
2015-07-15 22:00:00	2015-07-15 22:00:00	27.038	27.259	26.989	26.989	26.598	26.793	Night
2015-07-15 22:15:00	2015-07-15 22:15:00	27.038	27.235	26.94	26.94	26.622	26.793	Night
2015-07-15 22:30:00	2015-07-15 22:30:00	27.014	27.186	26.94	26.94	26.646	26.818	Night
2015-07-15 22:45:00	2015-07-15 22:45:00	27.014	27.136	26.916	26.916	26.622	26.842	Night
2015-07-15 23:00:00	2015-07-15 23:00:00	26.989	27.112	26.891	26.891	26.598	26.842	Night
2015-07-15 23:15:00	2015-07-15 23:15:00	26.989	27.063	26.891	26.891	26.573	26.867	Night
2015-07-15 23:30:00	2015-07-15 23:30:00	26.965	27.038	26.867	26.867	26.549	26.842	Night
2015-07-15 23:45:00	2015-07-15 23:45:00	26.965	27.014	26.842	26.867	26.549	26.818	Night
2015-07-16	2015-07-16	26.94	26.989	26.842	26.842	26.549	26.818	Night
2015-07-16 00:15:00	2015-07-16 00:15:00	26.916	26.965	26.842	26.842	26.549	26.818	Night
2015-07-16 00:30:00	2015-07-16 00:30:00	26.916	26.94	26.818	26.842	26.549	26.793	Night
2015-07-16 00:45:00	2015-07-16 00:45:00	26.891	26.891	26.818	26.842	26.549	26.818	Night
2015-07-16 01:00:00	2015-07-16 01:00:00	26.867	26.867	26.818	26.818	26.549	26.793	Night
2015-07-16 01:15:00	2015-07-16 01:15:00	26.842	26.842	26.793	26.818	26.451	26.769	Night
2015-07-16 01:30:00	2015-07-16 01:30:00	26.842	26.793	26.793	26.793	26.402	26.744	Night
2015-07-16 01:45:00	2015-07-16 01:45:00	26.818	26.769	26.769	26.793	26.378	26.72	Night
2015-07-16 02:00:00	2015-07-16 02:00:00	26.793	26.744	26.769	26.769	26.402	26.72	Night
2015-07-16 02:15:00	2015-07-16 02:15:00	26.793	26.744	26.744	26.769	26.402	26.646	Night
2015-07-16 02:30:00	2015-07-16 02:30:00	26.769	26.72	26.744	26.769	26.402	26.622	Night
2015-07-16 02:45:00	2015-07-16 02:45:00	26.769	26.695	26.744	26.744	26.426	26.622	Night
2015-07-16 03:00:00	2015-07-16 03:00:00	26.744	26.671	26.744	26.744	26.451	26.646	Night
2015-07-16 03:15:00	2015-07-16 03:15:00	26.744	26.671	26.72	26.744	26.451	26.622	Night
2015-07-16 03:30:00	2015-07-16 03:30:00	26.744	26.671	26.72	26.744	26.426	26.598	Night
2015-07-16 03:45:00	2015-07-16 03:45:00	26.744	26.646	26.72	26.744	26.426	26.622	Night
2015-07-16 04:00:00	2015-07-16 04:00:00	26.744	26.646	26.72	26.744	26.426	26.646	Night
2015-07-16 04:15:00	2015-07-16 04:15:00	26.72	26.646	26.72	26.744	26.451	26.646	Night
2015-07-16 04:30:00	2015-07-16 04:30:00	26.72	26.622	26.72	26.744	26.451	26.622	Night
2015-07-16 04:45:00	2015-07-16 04:45:00	26.72	26.622	26.72	26.744	26.475	26.622	Night
2015-07-16 05:00:00	2015-07-16 05:00:00	26.695	26.622	26.72	26.72	26.475	26.598	Night
2015-07-16 05:15:00	2015-07-16 05:15:00	26.695	26.598	26.695	26.72	26.5	26.598	Night
2015-07-16 05:30:00	2015-07-16 05:30:00	26.695	26.598	26.695	26.72	26.5	26.598	Night
2015-07-16 05:45:00	2015-07-16 05:45:00	26.671	26.598	26.695	26.695	26.524	26.573	Night
2015-07-16 06:00:00	2015-07-16 06:00:00	26.671	26.573	26.695	26.695	26.549	26.573	Night
2015-07-16 06:15:00	2015-07-16 06:15:00	26.671	26.549	26.671	26.695	26.549	26.573	Night
2015-07-16 06:30:00	2015-07-16 06:30:00	26.646	26.549	26.671	26.671	26.549	26.573	Night
2015-07-16 06:45:00	2015-07-16 06:45:00	26.646	26.524	26.646	26.671	26.549	26.573	Night
2015-07-16 07:00:00	2015-07-16 07:00:00	26.646	26.524	26.646	26.646	26.573	26.573	Night
2015-07-16 07:15:00	2015-07-16 07:15:00	26.646	26.5	26.622	26.646	26.573	26.573	Night
2015-07-16 07:30:00	2015-07-16 07:30:00	26.622	26.5	26.622	26.622	26.549	26.549	Night
2015-07-16 07:45:00	2015-07-16 07:45:00	26.622	26.5	26.598	26.622	26.549	26.549	Night
2015-07-16 08:00:00	2015-07-16 08:00:00	26.622	26.5	26.598	26.622	26.549	26.549	Night
2015-07-16 08:15:00	2015-07-16 08:15:00	26.622	26.5	26.598	26.622	26.549	26.549	Night
2015-07-16 08:30:00	2015-07-16 08:30:00	26.622	26.5	26.622	26.622	26.549	26.549	Night
2015-07-16 08:45:00	2015-07-16 08:45:00	26.646	26.524	26.622	26.646	26.524	26.549	Night
2015-07-16 09:00:00	2015-07-16 09:00:00	26.646	26.549	26.671	26.671	26.524	26.549	Night
2015-07-16 09:15:00	2015-07-16 09:15:00	26.671	26.549	26.695	26.695	26.549	26.549	Night
2015-07-16 09:30:00	2015-07-16 09:30:00	26.695	26.598	26.769	26.769	26.549	26.598	Night
2015-07-16 09:45:00	2015-07-16 09:45:00	26.72	26.646	26.867	26.842	26.451	26.646	Night
2015-07-16 10:00:00	2015-07-16 10:00:00	26.769	26.744	27.014	26.965	26.256	26.671	Night
2015-07-16 10:15:00	2015-07-16 10:15:00	26.842	26.818	27.136	27.087	26.182	26.695	Night
2015-07-16 10:30:00	2015-07-16 10:30:00	26.916	26.891	27.259	27.186	26.207	26.744	Night
2015-07-16 10:45:00	2015-07-16 10:45:00	26.989	26.989	27.382	27.308	26.256	26.793	Night
2015-07-16 11:00:00	2015-07-16 11:00:00	27.063	27.087	27.481	27.407	26.304	26.842	Day
2015-07-16 11:15:00	2015-07-16 11:15:00	27.161	27.21	27.604	27.53	26.182	26.891	Day
2015-07-16 11:30:00	2015-07-16 11:30:00	27.235	27.308	27.677	27.604	26.085	26.94	Day
2015-07-16 11:45:00	2015-07-16 11:45:00	27.284	27.382	27.727	27.677	26.109	26.965	Day
2015-07-16 12:00:00	2015-07-16 12:00:00	27.333	27.481	27.751	27.702	26.158	26.989	Day
2015-07-16 12:15:00	2015-07-16 12:15:00	27.333	27.554	27.751	27.727	26.231	27.038	Day
2015-07-16 12:30:00	2015-07-16 12:30:00	27.358	27.653	27.751	27.727	26.182	27.063	Day
2015-07-16 12:45:00	2015-07-16 12:45:00	27.407	27.776	27.776	27.751	26.134	26.94	Day
2015-07-16 13:00:00	2015-07-16 13:00:00	27.431	27.875	27.776	27.776	26.109	26.916	Day
2015-07-16 13:15:00	2015-07-16 13:15:00	27.481	27.974	27.776	27.776	26.134	26.916	Day
2015-07-16 13:30:00	2015-07-16 13:30:00	27.53	28.072	27.801	27.801	26.158	26.965	Day
2015-07-16 13:45:00	2015-07-16 13:45:00	27.554	28.171	27.825	27.825	26.256	27.038	Day
2015-07-16 14:00:00	2015-07-16 14:00:00	27.604	28.245	27.875	27.875	26.329	27.112	Day
2015-07-16 14:15:00	2015-07-16 14:15:00	27.628	28.345	27.924	27.899	26.426	27.063	Night
2015-07-16 14:30:00	2015-07-16 14:30:00	27.677	28.394	27.974	27.974	26.549	27.014	Night
2015-07-16 14:45:00	2015-07-16 14:45:00	27.727	28.468	28.072	28.023	26.622	27.038	Night
2015-07-16 15:00:00	2015-07-16 15:00:00	27.801	28.543	28.122	28.097	26.695	27.038	Night
2015-07-16 15:15:00	2015-07-16 15:15:00	27.825	28.593	28.196	28.147	26.72	27.063	Night
2015-07-16 15:30:00	2015-07-16 15:30:00	27.875	28.642	28.221	28.196	26.744	27.087	Night
2015-07-16 15:45:00	2015-07-16 15:45:00	27.899	28.692	28.27	28.245	26.744	27.063	Night
2015-07-16 16:00:00	2015-07-16 16:00:00	27.924	28.717	28.295	28.295	26.744	27.014	Night
2015-07-16 16:15:00	2015-07-16 16:15:00	27.949	28.742	28.32	28.32	26.744	26.965	Night
2015-07-16 16:30:00	2015-07-16 16:30:00	27.974	28.717	28.345	28.345	26.769	26.94	Night
2015-07-16 16:45:00	2015-07-16 16:45:00	27.949	28.692	28.345	28.345	26.744	26.94	Night
2015-07-16 17:00:00	2015-07-16 17:00:00	27.949	28.642	28.345	28.345	26.744	26.916	Night
2015-07-16 17:15:00	2015-07-16 17:15:00	27.924	28.568	28.345	28.345	26.769	26.916	Night
2015-07-16 17:30:00	2015-07-16 17:30:00	27.899	28.518	28.345	28.345	26.769	26.916	Night
2015-07-16 17:45:00	2015-07-16 17:45:00	27.875	28.468	28.345	28.345	26.769	26.94	Night
2015-07-16 18:00:00	2015-07-16 18:00:00	27.85	28.419	28.32	28.345	26.769	26.94	Night
2015-07-16 18:15:00	2015-07-16 18:15:00	27.825	28.369	28.32	28.32	26.769	26.94	Night
2015-07-16 18:30:00	2015-07-16 18:30:00	27.776	28.32	28.295	28.295	26.769	26.94	Night
2015-07-16 18:45:00	2015-07-16 18:45:00	27.751	28.27	28.27	28.27	26.769	26.94	Night
2015-07-16 19:00:00	2015-07-16 19:00:00	27.727	28.221	28.245	28.245	26.793	26.94	Night
2015-07-16 19:15:00	2015-07-16 19:15:00	27.702	28.171	28.196	28.196	26.793	26.965	Night
2015-07-16 19:30:00	2015-07-16 19:30:00	27.677	28.122	28.147	28.147	26.818	26.989	Night
2015-07-16 19:45:00	2015-07-16 19:45:00	27.653	28.122	28.072	28.097	26.842	27.038	Night
2015-07-16 20:00:00	2015-07-16 20:00:00	27.653	28.097	28.023	28.023	26.842	27.038	Night
2015-07-16 20:15:00	2015-07-16 20:15:00	27.653	28.122	27.949	27.949	26.573	27.063	Night
2015-07-16 20:30:00	2015-07-16 20:30:00	27.653	28.122	27.875	27.899	24.944	27.063	Night
2015-07-16 20:45:00	2015-07-16 20:45:00	27.677	28.147	27.825	27.825	24.774	27.063	Night
2015-07-16 21:00:00	2015-07-16 21:00:00	27.677	28.171	27.751	27.776	25.38	27.038	Night
2015-07-16 21:15:00	2015-07-16 21:15:00	27.677	28.196	27.702	27.727	25.963	27.014	Night
2015-07-16 21:30:00	2015-07-16 21:30:00	27.677	28.171	27.653	27.653	26.231	26.989	Night
2015-07-16 21:45:00	2015-07-16 21:45:00	27.677	28.147	27.604	27.628	26.28	26.989	Night
2015-07-16 22:00:00	2015-07-16 22:00:00	27.677	28.122	27.579	27.604	26.256	27.014	Night
2015-07-16 22:15:00	2015-07-16 22:15:00	27.677	28.072	27.554	27.579	25.671	27.038	Night
2015-07-16 22:30:00	2015-07-16 22:30:00	27.677	28.023	27.554	27.579	25.477	26.94	Night
2015-07-16 22:45:00	2015-07-16 22:45:00	27.653	27.974	27.554	27.554	25.574	26.573	Night
2015-07-16 23:00:00	2015-07-16 23:00:00	27.653	27.949	27.53	27.554	25.695	26.451	Night
2015-07-16 23:15:00	2015-07-16 23:15:00	27.628	27.924	27.53	27.53	25.793	26.426	Night
2015-07-16 23:30:00	2015-07-16 23:30:00	27.628	27.875	27.505	27.53	25.914	26.451	Night
2015-07-16 23:45:00	2015-07-16 23:45:00	27.604	27.85	27.505	27.505	26.036	26.451	Night
2015-07-17	2015-07-17	27.579	27.825	27.481	27.505	26.109	26.5	Night
2015-07-17 00:15:00	2015-07-17 00:15:00	27.53	27.801	27.481	27.481	26.182	26.573	Night
2015-07-17 00:30:00	2015-07-17 00:30:00	27.505	27.776	27.481	27.481	26.231	26.622	Night
2015-07-17 00:45:00	2015-07-17 00:45:00	27.456	27.727	27.456	27.481	26.256	26.622	Night
2015-07-17 01:00:00	2015-07-17 01:00:00	27.407	27.727	27.456	27.456	26.231	26.622	Night
2015-07-17 01:15:00	2015-07-17 01:15:00	27.358	27.702	27.431	27.456	26.28	26.598	Night
2015-07-17 01:30:00	2015-07-17 01:30:00	27.308	27.677	27.431	27.431	26.329	26.573	Night
2015-07-17 01:45:00	2015-07-17 01:45:00	27.259	27.677	27.407	27.407	26.378	26.573	Night
2015-07-17 02:00:00	2015-07-17 02:00:00	27.235	27.628	27.382	27.382	26.402	26.573	Night
2015-07-17 02:15:00	2015-07-17 02:15:00	27.21	27.604	27.358	27.358	26.426	26.598	Night
2015-07-17 02:30:00	2015-07-17 02:30:00	27.186	27.579	27.308	27.333	26.451	26.598	Night
2015-07-17 02:45:00	2015-07-17 02:45:00	27.186	27.53	27.284	27.284	26.451	26.622	Night
2015-07-17 03:00:00	2015-07-17 03:00:00	27.161	27.505	27.259	27.259	26.451	26.622	Night
2015-07-17 03:15:00	2015-07-17 03:15:00	27.161	27.481	27.235	27.235	26.451	26.622	Night
2015-07-17 03:30:00	2015-07-17 03:30:00	27.136	27.431	27.21	27.21	26.475	26.646	Night
2015-07-17 03:45:00	2015-07-17 03:45:00	27.136	27.407	27.186	27.186	26.5	26.695	Night
2015-07-17 04:00:00	2015-07-17 04:00:00	27.112	27.358	27.161	27.186	26.5	26.744	Night
2015-07-17 04:15:00	2015-07-17 04:15:00	27.087	27.333	27.161	27.161	26.524	26.793	Night
2015-07-17 04:30:00	2015-07-17 04:30:00	27.087	27.284	27.136	27.136	26.524	26.842	Night
2015-07-17 04:45:00	2015-07-17 04:45:00	27.063	27.259	27.112	27.136	26.475	26.818	Night
2015-07-17 05:00:00	2015-07-17 05:00:00	27.063	27.235	27.112	27.112	26.451	26.769	Night
2015-07-17 05:15:00	2015-07-17 05:15:00	27.063	27.186	27.087	27.112	26.475	26.72	Night
2015-07-17 05:30:00	2015-07-17 05:30:00	27.087	27.161	27.087	27.087	26.524	26.72	Night
2015-07-17 05:45:00	2015-07-17 05:45:00	27.087	27.136	27.087	27.087	26.549	26.744	Night
2015-07-17 06:00:00	2015-07-17 06:00:00	27.063	27.112	27.063	27.087	26.573	26.744	Night
2015-07-17 06:15:00	2015-07-17 06:15:00	27.063	27.087	27.063	27.063	26.573	26.769	Night
2015-07-17 06:30:00	2015-07-17 06:30:00	27.063	27.063	27.038	27.063	26.598	26.818	Night
2015-07-17 06:45:00	2015-07-17 06:45:00	27.038	27.063	27.038	27.038	26.598	26.842	Night
2015-07-17 07:00:00	2015-07-17 07:00:00	27.014	27.038	27.014	27.038	26.622	26.842	Night
2015-07-17 07:15:00	2015-07-17 07:15:00	26.989	27.038	26.989	27.014	26.646	26.842	Night
2015-07-17 07:30:00	2015-07-17 07:30:00	26.989	27.038	26.989	26.989	26.646	26.842	Night
2015-07-17 07:45:00	2015-07-17 07:45:00	26.965	27.038	26.989	26.989	26.671	26.842	Night
2015-07-17 08:00:00	2015-07-17 08:00:00	26.94	27.063	26.989	26.989	26.671	26.867	Night
2015-07-17 08:15:00	2015-07-17 08:15:00	26.94	27.087	27.014	27.014	26.671	26.891	Night
2015-07-17 08:30:00	2015-07-17 08:30:00	26.94	27.136	27.038	27.063	26.695	26.891	Night
2015-07-17 08:45:00	2015-07-17 08:45:00	26.965	27.186	27.087	27.112	26.598	26.891	Night
2015-07-17 09:00:00	2015-07-17 09:00:00	26.989	27.21	27.186	27.161	26.378	26.891	Night
2015-07-17 09:15:00	2015-07-17 09:15:00	27.038	27.259	27.259	27.259	26.304	26.916	Night
2015-07-17 09:30:00	2015-07-17 09:30:00	27.063	27.308	27.333	27.333	26.304	26.94	Night
2015-07-17 09:45:00	2015-07-17 09:45:00	27.087	27.333	27.407	27.382	26.28	26.94	Night
2015-07-17 10:00:00	2015-07-17 10:00:00	27.112	27.358	27.456	27.431	26.207	26.94	Night
2015-07-17 10:15:00	2015-07-17 10:15:00	27.136	27.382	27.481	27.481	26.182	26.965	Night
2015-07-17 10:30:00	2015-07-17 10:30:00	27.136	27.456	27.53	27.53	26.207	26.965	Night
2015-07-17 10:45:00	2015-07-17 10:45:00	27.186	27.505	27.579	27.579	26.256	26.989	Night
2015-07-17 11:00:00	2015-07-17 11:00:00	27.235	27.579	27.653	27.677	26.378	27.063	Day
2015-07-17 11:15:00	2015-07-17 11:15:00	27.284	27.653	27.751	27.776	26.426	27.087	Day
2015-07-17 11:30:00	2015-07-17 11:30:00	27.358	27.727	27.85	27.85	26.5	27.112	Day
2015-07-17 11:45:00	2015-07-17 11:45:00	27.431	27.85	27.924	27.924	26.598	27.136	Day
2015-07-17 12:00:00	2015-07-17 12:00:00	27.481	27.949	27.974	27.998	26.622	27.136	Day
2015-07-17 12:15:00	2015-07-17 12:15:00	27.579	28.048	28.023	28.023	26.646	27.136	Day
2015-07-17 12:30:00	2015-07-17 12:30:00	27.628	28.122	28.048	28.072	26.695	27.087	Day
2015-07-17 12:45:00	2015-07-17 12:45:00	27.677	28.196	28.072	28.072	26.598	27.038	Day
2015-07-17 13:00:00	2015-07-17 13:00:00	27.677	28.245	28.023	28.048	26.573	27.014	Day
2015-07-17 13:15:00	2015-07-17 13:15:00	27.653	28.27	27.974	27.998	26.622	27.014	Day
2015-07-17 13:30:00	2015-07-17 13:30:00	27.628	28.295	27.974	27.974	26.646	27.038	Day
2015-07-17 13:45:00	2015-07-17 13:45:00	27.628	28.369	27.974	27.949	26.695	27.063	Day
2015-07-17 14:00:00	2015-07-17 14:00:00	27.628	28.419	27.998	27.949	26.72	27.087	Day
2015-07-17 14:15:00	2015-07-17 14:15:00	27.653	28.493	28.023	27.949	26.744	27.136	Night
2015-07-17 14:30:00	2015-07-17 14:30:00	27.677	28.518	28.023	27.974	26.793	27.161	Night
2015-07-17 14:45:00	2015-07-17 14:45:00	27.727	28.568	28.048	27.998	26.842	27.186	Night
2015-07-17 15:00:00	2015-07-17 15:00:00	27.751	28.617	28.072	28.023	26.867	27.21	Night
2015-07-17 15:15:00	2015-07-17 15:15:00	27.776	28.642	28.097	28.048	26.891	27.235	Night
2015-07-17 15:30:00	2015-07-17 15:30:00	27.825	28.692	28.147	28.097	26.916	27.235	Night
2015-07-17 15:45:00	2015-07-17 15:45:00	27.825	28.717	28.171	28.147	26.94	27.21	Night
2015-07-17 16:00:00	2015-07-17 16:00:00	27.85	28.717	28.221	28.196	26.94	27.21	Night
2015-07-17 16:15:00	2015-07-17 16:15:00	27.875	28.692	28.245	28.221	26.989	27.21	Night
2015-07-17 16:30:00	2015-07-17 16:30:00	27.875	28.667	28.245	28.245	27.014	27.235	Night
2015-07-17 16:45:00	2015-07-17 16:45:00	27.875	28.617	28.221	28.221	27.038	27.259	Night
2015-07-17 17:00:00	2015-07-17 17:00:00	27.875	28.568	28.196	28.221	27.063	27.21	Night
2015-07-17 17:15:00	2015-07-17 17:15:00	27.85	28.493	28.196	28.221	27.087	27.186	Night
2015-07-17 17:30:00	2015-07-17 17:30:00	27.85	28.419	28.196	28.221	27.087	27.21	Night
2015-07-17 17:45:00	2015-07-17 17:45:00	27.825	28.345	28.221	28.221	27.087	27.21	Night
2015-07-17 18:00:00	2015-07-17 18:00:00	27.801	28.32	28.245	28.245	27.087	27.21	Night
2015-07-17 18:15:00	2015-07-17 18:15:00	27.776	28.245	28.245	28.245	27.112	27.21	Night
2015-07-17 18:30:00	2015-07-17 18:30:00	27.727	28.171	28.221	28.221	27.112	27.235	Night
2015-07-17 18:45:00	2015-07-17 18:45:00	27.677	28.097	28.196	28.196	27.136	27.284	Night
2015-07-17 19:00:00	2015-07-17 19:00:00	27.628	28.023	28.147	28.147	27.161	27.284	Night
2015-07-17 19:15:00	2015-07-17 19:15:00	27.604	27.974	28.072	28.072	27.186	27.284	Night
2015-07-17 19:30:00	2015-07-17 19:30:00	27.579	27.924	27.974	27.998	27.21	27.308	Night
2015-07-17 19:45:00	2015-07-17 19:45:00	27.554	27.899	27.924	27.924	27.235	27.308	Night
2015-07-17 20:00:00	2015-07-17 20:00:00	27.53	27.875	27.875	27.875	26.891	27.358	Night
2015-07-17 20:15:00	2015-07-17 20:15:00	27.481	27.825	27.825	27.825	25.841	27.358	Night
2015-07-17 20:30:00	2015-07-17 20:30:00	27.481	27.801	27.751	27.776	25.647	27.382	Night
2015-07-17 20:45:00	2015-07-17 20:45:00	27.456	27.751	27.677	27.702	26.231	27.333	Night
2015-07-17 21:00:00	2015-07-17 21:00:00	27.431	27.727	27.604	27.628	26.402	27.382	Night
2015-07-17 21:15:00	2015-07-17 21:15:00	27.431	27.677	27.554	27.579	26.5	27.382	Night
2015-07-17 21:30:00	2015-07-17 21:30:00	27.407	27.628	27.505	27.53	26.646	27.333	Night
2015-07-17 21:45:00	2015-07-17 21:45:00	27.407	27.604	27.456	27.481	26.818	27.333	Night
2015-07-17 22:00:00	2015-07-17 22:00:00	27.382	27.579	27.431	27.456	26.891	27.382	Night
2015-07-17 22:15:00	2015-07-17 22:15:00	27.382	27.554	27.407	27.431	26.94	27.358	Night
2015-07-17 22:30:00	2015-07-17 22:30:00	27.382	27.53	27.407	27.407	26.5	27.333	Night
2015-07-17 22:45:00	2015-07-17 22:45:00	27.382	27.481	27.382	27.382	26.549	27.308	Night
2015-07-17 23:00:00	2015-07-17 23:00:00	27.382	27.456	27.358	27.382	26.598	27.284	Night
2015-07-17 23:15:00	2015-07-17 23:15:00	27.382	27.431	27.333	27.358	26.769	27.284	Night
2015-07-17 23:30:00	2015-07-17 23:30:00	27.358	27.382	27.333	27.333	26.842	27.259	Night
2015-07-17 23:45:00	2015-07-17 23:45:00	27.358	27.358	27.308	27.333	26.818	27.21	Night
2015-07-18	2015-07-18	27.333	27.333	27.284	27.308	26.818	27.186	Night
2015-07-18 00:15:00	2015-07-18 00:15:00	27.333	27.308	27.284	27.284	26.793	27.186	Night
2015-07-18 00:30:00	2015-07-18 00:30:00	27.308	27.284	27.259	27.259	26.695	27.161	Night
2015-07-18 00:45:00	2015-07-18 00:45:00	27.308	27.259	27.235	27.259	26.646	27.136	Night
2015-07-18 01:00:00	2015-07-18 01:00:00	27.284	27.235	27.235	27.235	26.646	27.087	Night
2015-07-18 01:15:00	2015-07-18 01:15:00	27.259	27.186	27.235	27.235	26.646	27.087	Night
2015-07-18 01:30:00	2015-07-18 01:30:00	27.259	27.161	27.21	27.235	26.646	27.063	Night
2015-07-18 01:45:00	2015-07-18 01:45:00	27.259	27.136	27.186	27.21	26.671	27.038	Night
2015-07-18 02:00:00	2015-07-18 02:00:00	27.235	27.112	27.186	27.21	26.671	27.014	Night
2015-07-18 02:15:00	2015-07-18 02:15:00	27.235	27.087	27.186	27.186	26.695	26.989	Night
2015-07-18 02:30:00	2015-07-18 02:30:00	27.235	27.087	27.186	27.186	26.695	26.989	Night
2015-07-18 02:45:00	2015-07-18 02:45:00	27.235	27.087	27.161	27.186	26.695	26.94	Night
2015-07-18 03:00:00	2015-07-18 03:00:00	27.235	27.063	27.161	27.186	26.695	26.916	Night
2015-07-18 03:15:00	2015-07-18 03:15:00	27.21	27.038	27.161	27.161	26.72	26.891	Night
2015-07-18 03:30:00	2015-07-18 03:30:00	27.21	27.038	27.136	27.161	26.744	26.842	Night
2015-07-18 03:45:00	2015-07-18 03:45:00	27.21	27.014	27.136	27.161	26.769	26.842	Night
2015-07-18 04:00:00	2015-07-18 04:00:00	27.186	27.014	27.136	27.136	26.769	26.842	Night
2015-07-18 04:15:00	2015-07-18 04:15:00	27.161	26.989	27.112	27.112	26.793	26.842	Night
2015-07-18 04:30:00	2015-07-18 04:30:00	27.161	26.989	27.087	27.087	26.793	26.842	Night
2015-07-18 04:45:00	2015-07-18 04:45:00	27.136	26.965	27.063	27.063	26.793	26.842	Night
2015-07-18 05:00:00	2015-07-18 05:00:00	27.112	26.965	27.038	27.038	26.818	26.842	Night
2015-07-18 05:15:00	2015-07-18 05:15:00	27.087	26.94	27.014	27.014	26.793	26.793	Night
2015-07-18 05:30:00	2015-07-18 05:30:00	27.087	26.94	26.989	27.014	26.793	26.769	Night
2015-07-18 05:45:00	2015-07-18 05:45:00	27.063	26.916	26.965	26.989	26.793	26.744	Night
2015-07-18 06:00:00	2015-07-18 06:00:00	27.038	26.891	26.94	26.965	26.695	26.744	Night
2015-07-18 06:15:00	2015-07-18 06:15:00	27.014	26.867	26.916	26.94	26.671	26.744	Night
2015-07-18 06:30:00	2015-07-18 06:30:00	26.989	26.842	26.891	26.891	26.744	26.793	Night
2015-07-18 06:45:00	2015-07-18 06:45:00	26.965	26.818	26.867	26.891	26.744	26.793	Night
2015-07-18 07:00:00	2015-07-18 07:00:00	26.94	26.793	26.842	26.867	26.72	26.891	Night
2015-07-18 07:15:00	2015-07-18 07:15:00	26.94	26.769	26.842	26.842	26.72	26.965	Night
2015-07-18 07:30:00	2015-07-18 07:30:00	26.916	26.744	26.818	26.842	26.72	26.989	Night
2015-07-18 07:45:00	2015-07-18 07:45:00	26.916	26.744	26.818	26.842	26.744	27.014	Night
2015-07-18 08:00:00	2015-07-18 08:00:00	26.891	26.744	26.818	26.842	26.744	27.014	Night
2015-07-18 08:15:00	2015-07-18 08:15:00	26.891	26.769	26.842	26.842	26.769	27.014	Night
2015-07-18 08:30:00	2015-07-18 08:30:00	26.916	26.793	26.842	26.867	26.793	27.014	Night
2015-07-18 08:45:00	2015-07-18 08:45:00	26.916	26.818	26.867	26.891	26.793	27.038	Night
2015-07-18 09:00:00	2015-07-18 09:00:00	26.94	26.867	26.916	26.94	26.818	27.038	Night
2015-07-18 09:15:00	2015-07-18 09:15:00	26.965	26.916	26.965	26.989	26.867	27.063	Night
2015-07-18 09:30:00	2015-07-18 09:30:00	26.989	26.989	27.014	27.038	26.916	27.063	Night
2015-07-18 09:45:00	2015-07-18 09:45:00	27.038	27.038	27.087	27.136	26.671	27.063	Night
2015-07-18 10:00:00	2015-07-18 10:00:00	27.087	27.136	27.161	27.21	26.5	27.087	Night
2015-07-18 10:15:00	2015-07-18 10:15:00	27.112	27.186	27.235	27.308	26.573	27.087	Night
2015-07-18 10:30:00	2015-07-18 10:30:00	27.161	27.284	27.333	27.382	26.695	27.112	Night
2015-07-18 10:45:00	2015-07-18 10:45:00	27.21	27.382	27.431	27.481	26.793	27.136	Night
2015-07-18 11:00:00	2015-07-18 11:00:00	27.259	27.456	27.53	27.579	26.842	27.136	Day
2015-07-18 11:15:00	2015-07-18 11:15:00	27.308	27.579	27.579	27.653	26.818	27.161	Day
2015-07-18 11:30:00	2015-07-18 11:30:00	27.382	27.727	27.628	27.727	26.842	27.186	Day
2015-07-18 11:45:00	2015-07-18 11:45:00	27.431	27.875	27.702	27.776	26.867	27.235	Day
2015-07-18 12:00:00	2015-07-18 12:00:00	27.505	28.023	27.776	27.825	26.891	27.235	Day
2015-07-18 12:15:00	2015-07-18 12:15:00	27.554	28.171	27.825	27.875	26.867	27.259	Day
2015-07-18 12:30:00	2015-07-18 12:30:00	27.604	28.27	27.85	27.875	26.867	27.259	Day
2015-07-18 12:45:00	2015-07-18 12:45:00	27.653	28.394	27.825	27.85	26.891	27.259	Day
2015-07-18 13:00:00	2015-07-18 13:00:00	27.677	28.518	27.825	27.801	26.916	27.308	Day
2015-07-18 13:15:00	2015-07-18 13:15:00	27.727	28.568	27.85	27.801	26.94	27.284	Day
2015-07-18 13:30:00	2015-07-18 13:30:00	27.727	28.617	27.875	27.825	26.989	27.333	Day
2015-07-18 13:45:00	2015-07-18 13:45:00	27.727	28.642	27.924	27.85	27.038	27.358	Day
2015-07-18 14:00:00	2015-07-18 14:00:00	27.727	28.642	27.974	27.899	27.038	27.407	Day
2015-07-18 14:15:00	2015-07-18 14:15:00	27.751	28.642	27.998	27.924	27.063	27.456	Night
2015-07-18 14:30:00	2015-07-18 14:30:00	27.751	28.642	27.998	27.949	27.087	27.481	Night
2015-07-18 14:45:00	2015-07-18 14:45:00	27.776	28.617	27.998	27.949	27.112	27.431	Night
2015-07-18 15:00:00	2015-07-18 15:00:00	27.801	28.568	27.974	27.949	27.136	27.456	Night
2015-07-18 15:15:00	2015-07-18 15:15:00	27.801	28.543	27.949	27.924	27.136	27.456	Night
2015-07-18 15:30:00	2015-07-18 15:30:00	27.825	28.518	27.924	27.899	27.161	27.53	Night
2015-07-18 15:45:00	2015-07-18 15:45:00	27.825	28.518	27.899	27.899	27.161	27.53	Night
2015-07-18 16:00:00	2015-07-18 16:00:00	27.85	28.518	27.899	27.875	27.186	27.53	Night
2015-07-18 16:15:00	2015-07-18 16:15:00	27.85	28.468	27.875	27.875	27.186	27.554	Night
2015-07-18 16:30:00	2015-07-18 16:30:00	27.875	28.468	27.899	27.875	27.21	27.554	Night
2015-07-18 16:45:00	2015-07-18 16:45:00	27.875	28.419	27.899	27.899	27.21	27.554	Night
2015-07-18 17:00:00	2015-07-18 17:00:00	27.875	28.394	27.924	27.924	27.235	27.579	Night
2015-07-18 17:15:00	2015-07-18 17:15:00	27.875	28.32	27.924	27.924	27.259	27.554	Night
2015-07-18 17:30:00	2015-07-18 17:30:00	27.875	28.245	27.924	27.949	27.259	27.554	Night
2015-07-18 17:45:00	2015-07-18 17:45:00	27.875	28.196	27.924	27.924	27.259	27.554	Night
2015-07-18 18:00:00	2015-07-18 18:00:00	27.85	28.171	27.899	27.924	27.186	27.579	Night
2015-07-18 18:15:00	2015-07-18 18:15:00	27.85	28.122	27.875	27.875	27.014	27.604	Night
2015-07-18 18:30:00	2015-07-18 18:30:00	27.825	28.048	27.825	27.85	26.989	27.579	Night
2015-07-18 18:45:00	2015-07-18 18:45:00	27.825	27.998	27.801	27.825	26.94	27.554	Night
2015-07-18 19:00:00	2015-07-18 19:00:00	27.801	27.949	27.776	27.776	26.916	27.505	Night
2015-07-18 19:15:00	2015-07-18 19:15:00	27.776	27.924	27.727	27.727	26.94	27.505	Night
2015-07-18 19:30:00	2015-07-18 19:30:00	27.751	27.875	27.677	27.702	26.94	27.456	Night
2015-07-18 19:45:00	2015-07-18 19:45:00	27.727	27.801	27.628	27.653	26.916	27.431	Night
2015-07-18 20:00:00	2015-07-18 20:00:00	27.702	27.751	27.604	27.628	26.916	27.382	Night
2015-07-18 20:15:00	2015-07-18 20:15:00	27.677	27.702	27.579	27.579	26.916	27.358	Night
2015-07-18 20:30:00	2015-07-18 20:30:00	27.653	27.628	27.554	27.579	26.524	27.333	Night
2015-07-18 20:45:00	2015-07-18 20:45:00	27.628	27.579	27.53	27.53	25.065	27.308	Night
2015-07-18 21:00:00	2015-07-18 21:00:00	27.604	27.53	27.505	27.505	24.992	27.259	Night
2015-07-18 21:15:00	2015-07-18 21:15:00	27.579	27.481	27.481	27.481	25.647	27.235	Night
2015-07-18 21:30:00	2015-07-18 21:30:00	27.579	27.456	27.456	27.456	26.109	27.21	Night
2015-07-18 21:45:00	2015-07-18 21:45:00	27.53	27.407	27.431	27.431	26.256	27.186	Night
2015-07-18 22:00:00	2015-07-18 22:00:00	27.53	27.382	27.407	27.407	26.426	27.161	Night
2015-07-18 22:15:00	2015-07-18 22:15:00	27.505	27.333	27.358	27.382	26.573	27.136	Night
2015-07-18 22:30:00	2015-07-18 22:30:00	27.481	27.308	27.333	27.358	26.671	27.136	Night
2015-07-18 22:45:00	2015-07-18 22:45:00	27.456	27.259	27.333	27.333	26.72	27.136	Night
2015-07-18 23:00:00	2015-07-18 23:00:00	27.456	27.235	27.308	27.333	26.598	27.136	Night
2015-07-18 23:15:00	2015-07-18 23:15:00	27.431	27.186	27.308	27.308	25.258	27.136	Night
2015-07-18 23:30:00	2015-07-18 23:30:00	27.431	27.161	27.284	27.308	24.871	27.087	Night
2015-07-18 23:45:00	2015-07-18 23:45:00	27.407	27.136	27.284	27.284	25.38	27.038	Night
2015-07-19	2015-07-19	27.382	27.087	27.259	27.284	25.623	26.989	Night
2015-07-19 00:15:00	2015-07-19 00:15:00	27.358	27.038	27.235	27.259	25.817	26.891	Night
2015-07-19 00:30:00	2015-07-19 00:30:00	27.333	27.014	27.235	27.235	25.939	26.818	Night
2015-07-19 00:45:00	2015-07-19 00:45:00	27.333	26.989	27.186	27.21	25.671	26.793	Night
2015-07-19 01:00:00	2015-07-19 01:00:00	27.284	26.965	27.161	27.186	25.477	26.695	Night
2015-07-19 01:15:00	2015-07-19 01:15:00	27.284	26.916	27.136	27.161	25.55	26.646	Night
2015-07-19 01:30:00	2015-07-19 01:30:00	27.259	26.891	27.136	27.136	25.623	26.622	Night
2015-07-19 01:45:00	2015-07-19 01:45:00	27.235	26.867	27.136	27.136	25.671	26.646	Night
2015-07-19 02:00:00	2015-07-19 02:00:00	27.21	26.867	27.136	27.136	25.744	26.646	Night
2015-07-19 02:15:00	2015-07-19 02:15:00	27.186	26.842	27.112	27.136	25.768	26.646	Night
2015-07-19 02:30:00	2015-07-19 02:30:00	27.136	26.818	27.087	27.112	25.744	26.646	Night
2015-07-19 02:45:00	2015-07-19 02:45:00	27.112	26.818	27.063	27.087	25.793	26.646	Night
2015-07-19 03:00:00	2015-07-19 03:00:00	27.063	26.793	27.063	27.063	26.134	26.646	Night
2015-07-19 03:15:00	2015-07-19 03:15:00	27.014	26.793	27.038	27.038	26.378	26.72	Night
2015-07-19 03:30:00	2015-07-19 03:30:00	26.94	26.769	27.014	27.014	26.402	26.744	Night
2015-07-19 03:45:00	2015-07-19 03:45:00	26.867	26.769	26.965	26.989	26.402	26.793	Night
2015-07-19 04:00:00	2015-07-19 04:00:00	26.818	26.744	26.94	26.965	26.353	26.891	Night
2015-07-19 04:15:00	2015-07-19 04:15:00	26.769	26.72	26.891	26.916	26.304	26.818	Night
2015-07-19 04:30:00	2015-07-19 04:30:00	26.72	26.72	26.842	26.867	26.353	26.867	Night
2015-07-19 04:45:00	2015-07-19 04:45:00	26.695	26.695	26.793	26.818	26.378	26.867	Night
2015-07-19 05:00:00	2015-07-19 05:00:00	26.695	26.671	26.744	26.744	26.451	26.818	Night
2015-07-19 05:15:00	2015-07-19 05:15:00	26.695	26.646	26.671	26.695	26.5	26.793	Night
2015-07-19 05:30:00	2015-07-19 05:30:00	26.695	26.622	26.646	26.646	26.524	26.818	Night
2015-07-19 05:45:00	2015-07-19 05:45:00	26.72	26.598	26.622	26.622	26.549	26.793	Night
2015-07-19 06:00:00	2015-07-19 06:00:00	26.72	26.598	26.622	26.622	26.549	26.793	Night
2015-07-19 06:15:00	2015-07-19 06:15:00	26.72	26.573	26.622	26.622	26.598	26.867	Night
2015-07-19 06:30:00	2015-07-19 06:30:00	26.72	26.573	26.598	26.622	26.598	26.891	Night
2015-07-19 06:45:00	2015-07-19 06:45:00	26.72	26.549	26.598	26.622	26.622	26.965	Night
2015-07-19 07:00:00	2015-07-19 07:00:00	26.72	26.549	26.598	26.622	26.622	26.989	Night
2015-07-19 07:15:00	2015-07-19 07:15:00	26.72	26.549	26.622	26.622	26.646	27.038	Night
2015-07-19 07:30:00	2015-07-19 07:30:00	26.72	26.549	26.622	26.646	26.671	27.087	Night
2015-07-19 07:45:00	2015-07-19 07:45:00	26.744	26.549	26.646	26.671	26.695	27.087	Night
2015-07-19 08:00:00	2015-07-19 08:00:00	26.744	26.573	26.671	26.671	26.744	27.087	Night
2015-07-19 08:15:00	2015-07-19 08:15:00	26.793	26.598	26.695	26.695	26.744	27.063	Night
2015-07-19 08:30:00	2015-07-19 08:30:00	26.818	26.622	26.72	26.744	26.744	27.063	Night
2015-07-19 08:45:00	2015-07-19 08:45:00	26.867	26.646	26.769	26.793	26.769	27.087	Night
2015-07-19 09:00:00	2015-07-19 09:00:00	26.916	26.695	26.818	26.842	26.793	27.087	Night
2015-07-19 09:15:00	2015-07-19 09:15:00	26.965	26.744	26.891	26.916	26.793	27.112	Night
2015-07-19 09:30:00	2015-07-19 09:30:00	27.014	26.818	26.965	26.989	26.793	27.112	Night
2015-07-19 09:45:00	2015-07-19 09:45:00	27.063	26.891	27.063	27.112	26.818	27.136	Night
2015-07-19 10:00:00	2015-07-19 10:00:00	27.112	26.965	27.161	27.21	26.867	27.136	Night
2015-07-19 10:15:00	2015-07-19 10:15:00	27.161	27.038	27.284	27.333	26.916	27.161	Night
2015-07-19 10:30:00	2015-07-19 10:30:00	27.21	27.136	27.382	27.431	25.283	27.136	Night
2015-07-19 10:45:00	2015-07-19 10:45:00	27.259	27.235	27.481	27.554	25.137	27.136	Night
2015-07-19 11:00:00	2015-07-19 11:00:00	27.333	27.358	27.579	27.653	25.671	27.161	Day
2015-07-19 11:15:00	2015-07-19 11:15:00	27.382	27.456	27.653	27.751	26.182	27.186	Day
2015-07-19 11:30:00	2015-07-19 11:30:00	27.431	27.579	27.776	27.85	26.622	27.235	Day
2015-07-19 11:45:00	2015-07-19 11:45:00	27.481	27.677	27.875	27.949	26.061	27.259	Day
2015-07-19 12:00:00	2015-07-19 12:00:00	27.53	27.776	27.949	27.998	26.158	27.284	Day
2015-07-19 12:15:00	2015-07-19 12:15:00	27.579	27.875	27.998	28.023	26.549	27.308	Day
2015-07-19 12:30:00	2015-07-19 12:30:00	27.628	27.974	28.023	28.048	26.744	27.358	Day
2015-07-19 12:45:00	2015-07-19 12:45:00	27.653	28.072	28.048	28.023	26.891	27.382	Day
2015-07-19 13:00:00	2015-07-19 13:00:00	27.677	28.196	28.048	27.998	26.965	27.407	Day
2015-07-19 13:15:00	2015-07-19 13:15:00	27.702	28.27	28.023	27.974	26.818	27.431	Day
2015-07-19 13:30:00	2015-07-19 13:30:00	27.727	28.32	28.023	27.974	26.695	27.481	Day
2015-07-19 13:45:00	2015-07-19 13:45:00	27.727	28.394	28.023	27.949	26.598	27.481	Day
2015-07-19 14:00:00	2015-07-19 14:00:00	27.751	28.419	28.023	27.949	26.573	27.456	Day
2015-07-19 14:15:00	2015-07-19 14:15:00	27.751	28.419	28.023	27.949	26.573	27.505	Night
2015-07-19 14:30:00	2015-07-19 14:30:00	27.751	28.419	28.023	27.924	26.622	27.53	Night
2015-07-19 14:45:00	2015-07-19 14:45:00	27.751	28.444	28.023	27.924	26.695	27.554	Night
2015-07-19 15:00:00	2015-07-19 15:00:00	27.751	28.419	28.048	27.949	26.744	27.554	Night
2015-07-19 15:15:00	2015-07-19 15:15:00	27.751	28.369	28.048	27.949	26.769	27.505	Night
2015-07-19 15:30:00	2015-07-19 15:30:00	27.751	28.369	28.023	27.974	26.769	27.53	Night
2015-07-19 15:45:00	2015-07-19 15:45:00	27.776	28.369	28.023	27.974	26.818	27.53	Night
2015-07-19 16:00:00	2015-07-19 16:00:00	27.776	28.369	28.023	27.974	26.867	27.579	Night
2015-07-19 16:15:00	2015-07-19 16:15:00	27.776	28.369	27.998	27.974	26.916	27.505	Night
2015-07-19 16:30:00	2015-07-19 16:30:00	27.776	28.345	27.998	27.974	26.818	27.431	Night
2015-07-19 16:45:00	2015-07-19 16:45:00	27.776	28.32	27.998	27.974	26.793	27.554	Night
2015-07-19 17:00:00	2015-07-19 17:00:00	27.776	28.27	27.974	27.974	26.818	27.358	Night
2015-07-19 17:15:00	2015-07-19 17:15:00	27.751	28.245	27.974	27.974	26.867	27.308	Night
2015-07-19 17:30:00	2015-07-19 17:30:00	27.727	28.221	27.924	27.924	26.916	27.284	Night
2015-07-19 17:45:00	2015-07-19 17:45:00	27.727	28.221	27.899	27.924	26.965	27.382	Night
2015-07-19 18:00:00	2015-07-19 18:00:00	27.702	28.171	27.899	27.899	27.038	27.382	Night
2015-07-19 18:15:00	2015-07-19 18:15:00	27.702	28.147	27.924	27.924	27.063	27.481	Night
2015-07-19 18:30:00	2015-07-19 18:30:00	27.677	28.122	27.924	27.924	27.087	27.456	Night
2015-07-19 18:45:00	2015-07-19 18:45:00	27.653	28.072	27.924	27.924	27.087	27.358	Night
2015-07-19 19:00:00	2015-07-19 19:00:00	27.628	28.023	27.899	27.924	27.087	27.382	Night
2015-07-19 19:15:00	2015-07-19 19:15:00	27.604	27.974	27.85	27.875	27.112	27.431	Night
2015-07-19 19:30:00	2015-07-19 19:30:00	27.579	27.924	27.825	27.825	27.112	27.431	Night
2015-07-19 19:45:00	2015-07-19 19:45:00	27.53	27.85	27.776	27.776	27.112	27.382	Night
2015-07-19 20:00:00	2015-07-19 20:00:00	27.505	27.801	27.727	27.727	27.112	27.382	Night
2015-07-19 20:15:00	2015-07-19 20:15:00	27.481	27.751	27.677	27.702	27.112	27.407	Night
2015-07-19 20:30:00	2015-07-19 20:30:00	27.431	27.677	27.628	27.653	27.087	27.382	Night
2015-07-19 20:45:00	2015-07-19 20:45:00	27.407	27.628	27.579	27.604	27.063	27.333	Night
2015-07-19 21:00:00	2015-07-19 21:00:00	27.382	27.579	27.53	27.554	26.989	27.333	Night
2015-07-19 21:15:00	2015-07-19 21:15:00	27.382	27.53	27.505	27.53	25.817	27.308	Night
2015-07-19 21:30:00	2015-07-19 21:30:00	27.358	27.505	27.431	27.456	25.307	27.259	Night
2015-07-19 21:45:00	2015-07-19 21:45:00	27.358	27.456	27.382	27.407	25.137	27.235	Night
2015-07-19 22:00:00	2015-07-19 22:00:00	27.333	27.407	27.333	27.358	25.331	27.161	Night
2015-07-19 22:15:00	2015-07-19 22:15:00	27.333	27.358	27.308	27.333	25.598	27.136	Night
2015-07-19 22:30:00	2015-07-19 22:30:00	27.308	27.333	27.284	27.284	25.914	27.136	Night
2015-07-19 22:45:00	2015-07-19 22:45:00	27.284	27.284	27.235	27.259	26.256	27.112	Night
2015-07-19 23:00:00	2015-07-19 23:00:00	27.284	27.259	27.235	27.235	26.5	27.112	Night
2015-07-19 23:15:00	2015-07-19 23:15:00	27.284	27.21	27.21	27.21	26.426	27.087	Night
2015-07-19 23:30:00	2015-07-19 23:30:00	27.259	27.186	27.186	27.186	26.036	27.063	Night
2015-07-19 23:45:00	2015-07-19 23:45:00	27.235	27.161	27.161	27.161	25.939	27.038	Night
2015-07-20	2015-07-20	27.235	27.112	27.136	27.136	25.695	26.989	Night
2015-07-20 00:15:00	2015-07-20 00:15:00	27.21	27.087	27.112	27.112	25.647	26.94	Night
2015-07-20 00:30:00	2015-07-20 00:30:00	27.21	27.063	27.087	27.087	25.671	26.891	Night
2015-07-20 00:45:00	2015-07-20 00:45:00	27.186	27.014	27.063	27.063	25.647	26.793	Night
2015-07-20 01:00:00	2015-07-20 01:00:00	27.161	26.989	27.038	27.038	25.598	26.695	Night
2015-07-20 01:15:00	2015-07-20 01:15:00	27.136	26.94	27.014	27.014	25.574	26.598	Night
2015-07-20 01:30:00	2015-07-20 01:30:00	27.136	26.916	26.989	26.989	25.574	26.524	Night
2015-07-20 01:45:00	2015-07-20 01:45:00	27.112	26.891	26.965	26.989	25.647	26.475	Night
2015-07-20 02:00:00	2015-07-20 02:00:00	27.087	26.842	26.965	26.965	25.695	26.5	Night
2015-07-20 02:15:00	2015-07-20 02:15:00	27.063	26.818	26.965	26.965	25.72	26.549	Night
2015-07-20 02:30:00	2015-07-20 02:30:00	27.063	26.793	26.94	26.965	25.768	26.524	Night
2015-07-20 02:45:00	2015-07-20 02:45:00	27.038	26.769	26.94	26.94	25.793	26.549	Night
2015-07-20 03:00:00	2015-07-20 03:00:00	27.014	26.744	26.916	26.916	25.817	26.549	Night
2015-07-20 03:15:00	2015-07-20 03:15:00	26.989	26.744	26.891	26.916	25.841	26.598	Night
2015-07-20 03:30:00	2015-07-20 03:30:00	26.965	26.72	26.891	26.891	25.89	26.598	Night
2015-07-20 03:45:00	2015-07-20 03:45:00	26.916	26.695	26.867	26.891	25.963	26.573	Night
2015-07-20 04:00:00	2015-07-20 04:00:00	26.891	26.695	26.867	26.867	26.085	26.549	Night
2015-07-20 04:15:00	2015-07-20 04:15:00	26.842	26.671	26.818	26.842	26.158	26.524	Night
2015-07-20 04:30:00	2015-07-20 04:30:00	26.793	26.671	26.793	26.793	26.231	26.524	Night
2015-07-20 04:45:00	2015-07-20 04:45:00	26.744	26.646	26.744	26.769	26.231	26.5	Night
2015-07-20 05:00:00	2015-07-20 05:00:00	26.695	26.646	26.695	26.72	26.256	26.5	Night
2015-07-20 05:15:00	2015-07-20 05:15:00	26.671	26.622	26.646	26.671	26.28	26.5	Night
2015-07-20 05:30:00	2015-07-20 05:30:00	26.646	26.598	26.622	26.646	26.304	26.5	Night
2015-07-20 05:45:00	2015-07-20 05:45:00	26.598	26.573	26.598	26.598	26.304	26.549	Night
2015-07-20 06:00:00	2015-07-20 06:00:00	26.573	26.549	26.549	26.573	26.304	26.5	Night
2015-07-20 06:15:00	2015-07-20 06:15:00	26.549	26.524	26.549	26.549	26.329	26.5	Night
2015-07-20 06:30:00	2015-07-20 06:30:00	26.524	26.475	26.524	26.549	26.353	26.5	Night
2015-07-20 06:45:00	2015-07-20 06:45:00	26.5	26.451	26.5	26.5	26.329	26.5	Night
2015-07-20 07:00:00	2015-07-20 07:00:00	26.475	26.426	26.451	26.475	26.378	26.5	Night
2015-07-20 07:15:00	2015-07-20 07:15:00	26.451	26.402	26.451	26.451	26.378	26.549	Night
2015-07-20 07:30:00	2015-07-20 07:30:00	26.451	26.402	26.451	26.451	26.378	26.671	Night
2015-07-20 07:45:00	2015-07-20 07:45:00	26.451	26.402	26.426	26.451	26.378	26.744	Night
2015-07-20 08:00:00	2015-07-20 08:00:00	26.451	26.402	26.451	26.451	26.426	26.793	Night
2015-07-20 08:15:00	2015-07-20 08:15:00	26.451	26.426	26.451	26.451	26.475	26.842	Night
2015-07-20 08:30:00	2015-07-20 08:30:00	26.475	26.451	26.475	26.475	26.5	26.891	Night
2015-07-20 08:45:00	2015-07-20 08:45:00	26.5	26.5	26.5	26.524	26.549	26.916	Night
2015-07-20 09:00:00	2015-07-20 09:00:00	26.549	26.549	26.549	26.573	26.573	26.94	Night
2015-07-20 09:15:00	2015-07-20 09:15:00	26.622	26.598	26.622	26.646	26.598	26.94	Night
2015-07-20 09:30:00	2015-07-20 09:30:00	26.695	26.695	26.72	26.72	26.622	26.965	Night
2015-07-20 09:45:00	2015-07-20 09:45:00	26.769	26.769	26.793	26.818	26.646	26.989	Night
2015-07-20 10:00:00	2015-07-20 10:00:00	26.842	26.867	26.891	26.891	26.695	27.014	Night
2015-07-20 10:15:00	2015-07-20 10:15:00	26.891	26.965	26.965	26.989	26.744	27.038	Night
2015-07-20 10:30:00	2015-07-20 10:30:00	26.965	27.087	27.087	27.136	26.818	27.038	Night
2015-07-20 10:45:00	2015-07-20 10:45:00	27.038	27.186	27.235	27.259	26.867	27.063	Night
2015-07-20 11:00:00	2015-07-20 11:00:00	27.112	27.308	27.333	27.382	26.94	27.087	Day
2015-07-20 11:15:00	2015-07-20 11:15:00	27.161	27.431	27.431	27.456	26.891	27.112	Day
2015-07-20 11:30:00	2015-07-20 11:30:00	27.235	27.579	27.505	27.554	26.622	27.161	Day
2015-07-20 11:45:00	2015-07-20 11:45:00	27.308	27.727	27.579	27.628	25.404	27.186	Day
2015-07-20 12:00:00	2015-07-20 12:00:00	27.358	27.85	27.677	27.702	25.016	27.21	Day
2015-07-20 12:15:00	2015-07-20 12:15:00	27.431	27.974	27.776	27.751	25.283	27.259	Day
2015-07-20 12:30:00	2015-07-20 12:30:00	27.505	28.097	27.825	27.801	25.501	27.284	Day
2015-07-20 12:45:00	2015-07-20 12:45:00	27.554	28.171	27.875	27.825	25.598	27.333	Day
2015-07-20 13:00:00	2015-07-20 13:00:00	27.579	28.245	27.875	27.825	25.574	27.358	Day
2015-07-20 13:15:00	2015-07-20 13:15:00	27.604	28.295	27.85	27.801	25.817	27.382	Day
2015-07-20 13:30:00	2015-07-20 13:30:00	27.604	28.394	27.85	27.776	26.182	27.431	Day
2015-07-20 13:45:00	2015-07-20 13:45:00	27.604	28.468	27.85	27.751	26.304	27.53	Day
2015-07-20 14:00:00	2015-07-20 14:00:00	27.628	28.518	27.875	27.751	26.5	27.579	Day
2015-07-20 14:15:00	2015-07-20 14:15:00	27.653	28.543	27.875	27.751	26.5	27.604	Night
2015-07-20 14:30:00	2015-07-20 14:30:00	27.677	28.568	27.875	27.776	26.451	27.554	Night
2015-07-20 14:45:00	2015-07-20 14:45:00	27.702	28.593	27.899	27.776	26.5	27.53	Night
2015-07-20 15:00:00	2015-07-20 15:00:00	27.727	28.593	27.875	27.801	26.524	27.53	Night
2015-07-20 15:15:00	2015-07-20 15:15:00	27.727	28.593	27.875	27.801	26.524	27.554	Night
2015-07-20 15:30:00	2015-07-20 15:30:00	27.727	28.568	27.85	27.801	26.549	27.579	Night
2015-07-20 15:45:00	2015-07-20 15:45:00	27.727	28.568	27.85	27.801	26.524	27.554	Night
2015-07-20 16:00:00	2015-07-20 16:00:00	27.751	28.543	27.825	27.801	26.5	27.554	Night
2015-07-20 16:15:00	2015-07-20 16:15:00	27.751	28.518	27.825	27.801	26.451	27.554	Night
2015-07-20 16:30:00	2015-07-20 16:30:00	27.751	28.468	27.801	27.776	26.475	27.235	Night
2015-07-20 16:45:00	2015-07-20 16:45:00	27.751	28.394	27.776	27.776	26.475	27.161	Night
2015-07-20 17:00:00	2015-07-20 17:00:00	27.751	28.32	27.776	27.776	26.475	27.014	Night
2015-07-20 17:15:00	2015-07-20 17:15:00	27.727	28.27	27.751	27.776	26.451	27.112	Night
2015-07-20 17:30:00	2015-07-20 17:30:00	27.727	28.221	27.751	27.751	26.475	27.112	Night
2015-07-20 17:45:00	2015-07-20 17:45:00	27.727	28.171	27.727	27.751	26.475	27.112	Night
2015-07-20 18:00:00	2015-07-20 18:00:00	27.727	28.122	27.727	27.727	26.475	27.112	Night
2015-07-20 18:15:00	2015-07-20 18:15:00	27.727	28.072	27.727	27.727	26.475	27.063	Night
2015-07-20 18:30:00	2015-07-20 18:30:00	27.727	27.998	27.702	27.727	26.524	27.063	Night
2015-07-20 18:45:00	2015-07-20 18:45:00	27.702	27.924	27.702	27.702	26.402	27.014	Night
2015-07-20 19:00:00	2015-07-20 19:00:00	27.677	27.875	27.677	27.702	26.304	26.94	Night
2015-07-20 19:15:00	2015-07-20 19:15:00	27.653	27.85	27.677	27.677	26.353	27.063	Night
2015-07-20 19:30:00	2015-07-20 19:30:00	27.628	27.825	27.653	27.677	26.451	27.087	Night
2015-07-20 19:45:00	2015-07-20 19:45:00	27.604	27.801	27.628	27.653	26.598	27.112	Night
2015-07-20 20:00:00	2015-07-20 20:00:00	27.579	27.776	27.628	27.628	26.671	27.112	Night
2015-07-20 20:15:00	2015-07-20 20:15:00	27.53	27.727	27.604	27.604	26.744	27.087	Night
2015-07-20 20:30:00	2015-07-20 20:30:00	27.505	27.702	27.579	27.604	26.769	27.112	Night
2015-07-20 20:45:00	2015-07-20 20:45:00	27.481	27.677	27.554	27.579	26.769	27.087	Night
2015-07-20 21:00:00	2015-07-20 21:00:00	27.431	27.628	27.53	27.554	26.793	27.038	Night
2015-07-20 21:15:00	2015-07-20 21:15:00	27.382	27.604	27.53	27.53	26.818	27.038	Night
2015-07-20 21:30:00	2015-07-20 21:30:00	27.333	27.579	27.505	27.53	26.818	27.014	Night
2015-07-20 21:45:00	2015-07-20 21:45:00	27.308	27.53	27.481	27.505	26.842	27.014	Night
2015-07-20 22:00:00	2015-07-20 22:00:00	27.259	27.481	27.456	27.456	26.842	27.038	Night
2015-07-20 22:15:00	2015-07-20 22:15:00	27.21	27.456	27.407	27.431	25.89	27.038	Night
2015-07-20 22:30:00	2015-07-20 22:30:00	27.186	27.431	27.358	27.382	25.453	27.014	Night
2015-07-20 22:45:00	2015-07-20 22:45:00	27.136	27.382	27.308	27.333	25.404	27.014	Night
2015-07-20 23:00:00	2015-07-20 23:00:00	27.112	27.358	27.235	27.259	25.55	27.014	Night
2015-07-20 23:15:00	2015-07-20 23:15:00	27.087	27.333	27.186	27.21	25.744	27.014	Night
2015-07-20 23:30:00	2015-07-20 23:30:00	27.063	27.284	27.136	27.161	26.012	27.014	Night
2015-07-20 23:45:00	2015-07-20 23:45:00	27.063	27.259	27.087	27.112	25.671	27.014	Night
2015-07-21	2015-07-21	27.038	27.235	27.063	27.087	25.695	27.014	Night
2015-07-21 00:15:00	2015-07-21 00:15:00	27.038	27.21	27.038	27.038	25.623	26.965	Night
2015-07-21 00:30:00	2015-07-21 00:30:00	27.014	27.186	26.989	27.014	25.598	26.891	Night
2015-07-21 00:45:00	2015-07-21 00:45:00	27.014	27.161	26.989	26.989	25.695	26.867	Night
2015-07-21 01:00:00	2015-07-21 01:00:00	26.989	27.136	26.965	26.989	25.817	26.891	Night
2015-07-21 01:15:00	2015-07-21 01:15:00	26.989	27.087	26.965	26.965	25.866	26.891	Night
2015-07-21 01:30:00	2015-07-21 01:30:00	26.989	27.087	26.94	26.965	25.866	26.842	Night
2015-07-21 01:45:00	2015-07-21 01:45:00	26.989	27.063	26.94	26.965	25.477	26.793	Night
2015-07-21 02:00:00	2015-07-21 02:00:00	26.989	27.038	26.94	26.94	25.331	26.695	Night
2015-07-21 02:15:00	2015-07-21 02:15:00	26.965	27.014	26.94	26.94	25.283	26.598	Night
2015-07-21 02:30:00	2015-07-21 02:30:00	26.965	26.989	26.916	26.94	25.355	26.646	Night
2015-07-21 02:45:00	2015-07-21 02:45:00	26.965	26.989	26.916	26.916	25.477	26.695	Night
2015-07-21 03:00:00	2015-07-21 03:00:00	26.965	26.94	26.891	26.916	25.525	26.72	Night
2015-07-21 03:15:00	2015-07-21 03:15:00	26.94	26.94	26.891	26.891	25.598	26.72	Night
2015-07-21 03:30:00	2015-07-21 03:30:00	26.94	26.916	26.867	26.891	25.647	26.72	Night
2015-07-21 03:45:00	2015-07-21 03:45:00	26.94	26.891	26.867	26.867	25.72	26.671	Night
2015-07-21 04:00:00	2015-07-21 04:00:00	26.916	26.867	26.842	26.867	25.695	26.646	Night
2015-07-21 04:15:00	2015-07-21 04:15:00	26.916	26.842	26.842	26.842	25.695	26.549	Night
2015-07-21 04:30:00	2015-07-21 04:30:00	26.891	26.818	26.818	26.842	25.89	26.475	Night
2015-07-21 04:45:00	2015-07-21 04:45:00	26.867	26.793	26.793	26.818	26.036	26.475	Night
2015-07-21 05:00:00	2015-07-21 05:00:00	26.842	26.769	26.793	26.793	26.109	26.475	Night
2015-07-21 05:15:00	2015-07-21 05:15:00	26.842	26.744	26.793	26.793	26.182	26.475	Night
2015-07-21 05:30:00	2015-07-21 05:30:00	26.793	26.72	26.769	26.793	26.256	26.475	Night
2015-07-21 05:45:00	2015-07-21 05:45:00	26.769	26.695	26.744	26.769	26.256	26.475	Night
2015-07-21 06:00:00	2015-07-21 06:00:00	26.744	26.695	26.744	26.744	26.304	26.451	Night
2015-07-21 06:15:00	2015-07-21 06:15:00	26.72	26.671	26.72	26.744	26.353	26.451	Night
2015-07-21 06:30:00	2015-07-21 06:30:00	26.695	26.646	26.72	26.72	26.402	26.451	Night
2015-07-21 06:45:00	2015-07-21 06:45:00	26.646	26.646	26.695	26.72	26.402	26.475	Night
2015-07-21 07:00:00	2015-07-21 07:00:00	26.622	26.622	26.671	26.695	26.426	26.5	Night
2015-07-21 07:15:00	2015-07-21 07:15:00	26.598	26.622	26.646	26.671	26.426	26.5	Night
2015-07-21 07:30:00	2015-07-21 07:30:00	26.573	26.598	26.622	26.646	26.451	26.5	Night
[truncated: 16,769 more rows]
